# Supplementary material for: Cancer-Preventive Role of Bone Marrow-Derived Mesenchymal Stem Cells on Colitis-Associated Colorectal Cancer: Roles of Gut Microbiota Involved
Source: Front Cell Dev Biol. 2021 Jun 4;9:642948. doi: 10.3389/fcell.2021.642948 (PMC8212064; doi:10.3389/fcell.2021.642948)
Supplement: Supplementary file 3 [file Table_3.XLSX]

## Sheet: Table 4
Summary of all the gens expressed and the fold change and Q value in AOM/DSS and AOM/DSS+MSCs groups.
Other Gene ID	AME1 FPKM	AME2 FPKM	AME3 FPKM	AD1 FPKM	AD2 FPKM	AD3 FPKM	log2(AD/AME)	Qvalue(AD-vs-AME)
Cd74	446.08	205.34	166.64	349.27	1142.6	228.52	1.07036	0
Ly6e	644.07	561.57	670.16	949.85	957.39	683.02	0.475083	0
Defa36	23.41	13.05	48.73	121.93	307.83	374.23	3.23103	0
Tpt1	1797.98	2646.13	2874.78	1635.08	1916.34	2393.66	-0.302848	0
Clca4b	91.12	188.65	115.81	180.12	323.83	352.13	1.10669	0
Lyz1	760.65	1125.1	641.57	888.19	1073.9	1267.23	0.349476	0
Defa22	40.39	19.47	35.84	142.73	286.34	262.89	2.84704	0
Sprr2a1	528.07	487.49	367.48	198.27	280.21	242.23	-0.945145	0
Defa2	8.87	64.69	110.69	320.05	355.24	793.64	2.99242	0
H2-D1	648.54	486.28	459.62	542.92	969	563.06	0.373829	0
B3gnt7	190.36	120.8	27.14	35.96	68.1	57.27	-1.07697	0
Hspa8	1669.29	1489.17	2468.61	1287.79	1356.95	1740.5	-0.361342	0
Tgm3	117.8	140.28	29.1	26.51	59.27	20.13	-1.4355	0
Ctsd	308.78	288.24	289.66	474.46	412.69	346.65	0.477463	0
Bgn	63.67	71.55	58.03	88.81	176.36	61.68	0.75139	0
Pglyrp1	1325.89	1117.99	2227.58	2051.72	1798.59	2078.18	0.344665	0
Rpl38	812.1	1348.46	1475.91	735.49	593.48	960.51	-0.659572	0
Rps12	1195.93	2246.34	2182.25	1332.35	1289.88	1728.57	-0.371815	0
LOC108168162	431.11	605.04	801.96	225.25	365.4	541.9	-0.722186	0
H2-Eb1	68.92	29.2	28.33	65.55	201.04	40.07	1.267	0
Car4	169.84	71.49	16.39	20.45	57.2	22.61	-1.37416	0
Krt14	101.53	36.04	85.45	45.4	7.07	43.87	-1.16509	0
Rps3a1	732.78	1446.49	1416.84	752.57	810.38	1263.65	-0.35016	0
H2-Aa	137.41	64.2	54.88	103.13	327.87	79.37	0.981035	0
Hspa1b	80.87	13.1	18.13	9.19	19.21	7.59	-1.64734	0
Selenbp1	190.61	85.34	24.26	23.62	61.07	44.84	-1.22363	0
Lgals3	961.58	677.89	819.09	431.37	543.17	535.75	-0.704326	0
Ifit1bl1	52.88	47.26	49.27	46.93	155.78	123.31	1.11377	0
Wfdc2	341.23	144.15	163.73	70.95	55.54	109.62	-1.46073	0
H2-K1	502.94	389.83	271.39	391.76	843.81	377.8	0.455382	0
Lyz2	164.34	180.09	123.25	327.16	507.2	277.83	1.24484	0
Krt8	2849.03	2180.37	2407.02	2026.63	1814.79	2203.16	-0.299661	0
Plet1	44.21	123.23	67.11	161.14	189.5	118.53	0.998088	0
Apcdd1	50.24	10.22	18.84	50.61	67.81	41.59	1.0089	0
LOC105244208	1161.33	1628.78	1675.94	1144.01	1012.24	1347.82	-0.350494	0
Mki67	7.81	25.81	31.19	6.91	8.94	19.23	-0.880995	0
Dmbt1	644.28	488.18	266.42	694.48	718.57	682.91	0.585272	0
Gsdmc4	330.41	392.72	65.14	61.89	256.89	77.62	-1.00291	0
Irf7	61.54	36.11	34.45	58.48	139.37	63.8	0.969588	0
Sprr2a2	678.83	502.02	334.22	110.98	361.4	196.08	-1.19208	0
Rpl28	1781.99	2369.82	2738.54	1815.4	1494.01	1869.09	-0.408746	0
Cd177	158.58	130.91	104.14	249	199.38	139.21	0.616415	0
H2-Ab1	164.76	64.28	45.74	131.06	395.77	68.13	1.10306	0
Hsp90aa1	70.16	181.32	339.17	59.68	72.89	174.22	-0.94862	0
Gm42368	4.65	15.45	1.58	16.54	62.26	1.93	1.88239	0
Gsdmc3	62.54	39.2	10.23	4.39	21.1	11.41	-1.60298	0
Muc2	450.5	492.37	115.5	240.87	334.41	203.68	-0.44743	0
Muc3	412.09	296.99	65.93	61.47	200.12	135.9	-0.963197	0
Gm39701	16.22	143.99	12.64	17.58	10	23.17	-1.76897	0
Npm1	123.43	435.22	549.13	170.09	170.4	377.5	-0.629375	0
Itln1	137.18	56.26	136.82	288.79	171.04	159.22	0.911925	0
Psap	347.68	267.54	176.34	418.61	482.61	260.34	0.551286	0
Crip1	893.27	515.94	555.3	336.92	340.04	458.66	-0.793223	0
Lgals3bp	132.25	134.75	101.37	226.47	286.5	130.31	0.801932	0
Pnliprp2	40.79	11.77	74.75	165.83	125.75	97.09	1.61492	0
Mpeg1	10.77	9.27	8.82	18.28	38.9	14.62	1.30803	0
Adamdec1	20.18	43.23	31.98	42.7	130.6	43.45	1.17373	0
Lgals4	2189.49	2208.62	1962.94	1357.67	1326.27	2169.68	-0.392834	0
Reg3g	58.67	189.99	78.66	405.13	63.99	260.48	1.16666	0
Lypd8	6747.9	5027.46	4334.05	4893.89	7107.2	7429.9	0.279724	0
Nos2	18.47	16.06	22.74	54.96	48.13	31.43	1.24376	0
Duox2	67.39	62.12	59.09	113.15	123.73	79.15	0.743578	0
Gsdmc2	223.34	292.88	67.06	37.61	203.19	99.41	-0.76105	0
Clca3b	196.45	185.46	174.17	366.19	477.94	281.47	1.01443	0
Defa30	25.98	46.23	58.26	219.7	358.05	428.98	2.94265	0
Ncl	37.23	113.64	136.73	45.93	41.8	109.63	-0.535894	0
Lamp2	107.5	164.5	175.88	206.38	196.4	279.12	0.595894	0
Agr2	590.37	908.12	442.59	293.02	371.74	459.11	-0.79328	0
Jchain	85.01	29.35	11.18	75.92	562.32	64.69	2.46671	0
Thbs4	98.32	54.05	14.17	21.49	27.48	29.29	-1.0952	0
Oasl2	27.72	24.97	16.56	29.33	95.1	34.93	1.23221	0
Oit1	622.82	693.9	358.67	317.65	402.19	437.45	-0.519131	0
B2m	253.26	357.75	346.8	305.12	791.06	392.21	0.627093	0
Sprr2a3	2114.92	1402.5	927.82	625.47	1270.65	631.28	-0.822496	0
Gm41476	62.67	10.36	5.94	82.71	14.69	102.95	1.34671	0
Krt19	2814.86	2198.4	2827.86	2109.61	1663.32	2269.36	-0.308776	0
Rpl7	704.85	1672.09	1934.72	833.93	884.53	1621.28	-0.371246	0
Zg16	1288.15	487.6	1129.99	375.66	696.3	948.83	-0.528863	0
Gpx2	854.31	1386.79	914.16	1613.32	866.21	1401.64	0.30201	0
Defa32	0.01	39.05	128.52	161.43	149.56	656.81	2.52768	0
Defa31	14.58	28.22	33.07	112.3	156.07	163.98	2.50686	0
Guca2a	367.54	484.98	159.83	94.18	183.88	144.17	-1.26997	0
Pigr	603.13	513.35	252.66	398.62	695.01	572.66	0.276128	0
Saa1	694.5	668.69	569.02	786.72	906.92	1170.87	0.564014	0
Wfdc18	306.76	555.47	926.9	1399	437.91	958.45	0.653122	0
Gm6958	27.65	156.12	139.77	79.15	3.02	9.05	-1.80171	0
Rnf213	11.48	6.51	5.93	11.38	27.95	10.18	1.04098	0
Rps20	125.58	243.75	249.61	129.65	130.87	182.7	-0.483589	0
Krt13	105.7	10.7	25.7	8.97	3	16.25	-2.39049	0
Krt6a	49.33	2.3	5.85	6.81	0.92	2.72	-2.44588	0
Ltf	85.87	3.26	3.57	8.82	4.19	12.1	-1.8851	0
Krt5	79.37	0.11	0	0	0.14	0	-9.15582	0
Spock2	244.99	99.08	239.03	384.57	400.49	232.93	0.796136	0
Defa24	133.97	292.13	232.49	552.21	644.03	865.5	1.64301	0
Pnliprp1	77.85	35.36	89.4	254.34	130.53	112.75	1.30414	0
Defa17	124.43	249.82	245.22	501.68	470.11	719.46	1.44755	0
Defa5	26.92	16.07	8.01	81.98	167.32	123.74	2.86212	0
Defa33	129.37	50.93	27.45	160.76	703.98	86.18	2.17964	0
Apoe	342.97	184.01	192.55	500.47	1088.18	369.27	1.43713	0
Mcpt1	32.2	46.86	12.35	49.67	261.19	10.65	1.79782	0
Defa21	21.42	18.9	30.84	99.22	229.61	195.68	2.87416	0
Defa20	128.81	50.13	0.69	215.22	684.33	9.22	2.32559	0
Clca4a	31.92	108.77	39.8	18.55	38.18	29.27	-1.07785	0
Clca1	883.53	224.71	141.96	210	1201.31	176.02	0.351863	0
Cldn4	175.32	152.15	288.31	417.84	280.44	220.82	0.582937	0
Rps18	1435.01	1997.11	2212.87	1477.63	1210.96	1718.29	-0.357068	3.15e-303
Ftl1	1440.52	1557.68	1543.81	2028.16	1752.14	1631.16	0.25336	6.16e-296
Adh1	373.01	266.88	62.15	100.92	173.93	178.57	-0.638862	7.25e-295
Mmp15	76.05	51.56	55.25	89.56	108.85	71.81	0.560982	7.13e-294
Nkd1	91.62	79.02	147.44	177.96	136.27	114.14	0.432907	1.48e-289
Rpl26	681.91	1461.01	1678.01	776.25	843.83	1261.16	-0.409636	6.42e-287
C1qc	43.94	27.4	28.22	71.05	134.45	48.63	1.34013	2.07e-285
Nedd4	82.9	89.97	45.4	102.76	104.61	92.48	0.456118	3.86e-284
Rpl17	813.24	1252.51	1448.71	879.95	803.67	1063.96	-0.35542	9.83e-284
Ptma	1123.46	1454.79	2041.85	1399.78	963.12	1536.79	-0.242696	5.8e-283
Rps2	1900.96	2380.24	2458.44	2343.68	1600.74	1838.71	-0.218101	5e-282
Rpl12	1341.77	1762.28	1867.2	1382.06	1109.57	1469.67	-0.327138	6.92e-282
Sycn	403.75	81.19	50.3	28.13	96.51	102.94	-1.24646	3.91e-275
C1qa	77.55	47.9	66.09	100.27	201.43	81.14	0.992475	4.35e-272
Rps7	816.97	1172.81	1180.18	803.24	739.27	992.68	-0.323338	4.81e-268
LOC100862455	387.37	941.8	954	396.91	388.64	743.08	-0.581231	2.71e-267
LOC100044627	387.37	941.8	954	396.91	388.64	743.08	-0.581231	2.71e-267
Rps24	636.71	1267.84	1202.46	680.59	719.99	1008.26	-0.385197	3e-266
Rps11	1225.28	1580.79	1869.23	1343.38	1054.33	1292.16	-0.340268	3.44e-266
Hspa1a	38.44	2.49	6.79	2.57	7.12	1.95	-2.04623	8.5e-266
Klf4	136.94	87.74	50.14	38.43	82.42	57.11	-0.63577	1.59e-263
C1qb	50.13	32.35	38.5	77.72	148.78	51.66	1.19485	3.74e-262
Defa3	9.88	0	13.95	53.6	54.13	104.67	3.15451	3.73e-258
Rps8	1389.65	1894.29	1964.52	1508.52	1236.3	1576.2	-0.280111	2.22e-257
Laptm5	22.58	20.82	8.55	35.22	68.1	15.85	1.18784	4.75e-257
Ctsb	345.49	375.91	369.98	424.15	480.08	432.38	0.350236	1.07e-254
Rps16	1586.81	1776.81	1735.6	1530.75	1214.7	1370.35	-0.308148	4.02e-254
Rps17	744.69	1115.41	1277.18	682.54	650.18	946.34	-0.462399	6.01e-253
Clu	146.5	353.15	466.48	620.04	257.26	354.23	0.370554	2.55e-251
Ly6a	542.1	596.46	767.34	711.92	774.33	958.07	0.358621	1.04e-250
Pmp22	141.01	112.59	92.28	58.54	102.43	48.07	-0.725238	2.9e-250
Rps23	1058.84	1650.76	1841.78	1195.71	1023.25	1379	-0.339135	6.6e-244
Spink4	878.41	1641.33	1033.66	748.86	773.94	1039.52	-0.474502	7.61e-243
Tapbp	116.25	70.21	71.06	125.69	159.12	90.7	0.541417	9.81e-242
Tgm2	41.23	65.82	58.66	109.63	67.89	70.31	0.584785	1.58e-238
Tmem176b	264.13	213.7	241.36	415.28	349.05	248	0.507622	2.62e-237
Cnbd2	285.21	287.76	406.21	277.73	210.57	258.05	-0.393007	8.54e-235
Mcpt2	17.76	30.39	7.74	28.94	135.69	8.78	1.61804	1.21e-234
Hspa5	248.41	292.07	389.34	173.83	230.15	332.43	-0.339988	6.53e-234
Rpl11	1001.68	1319.23	1514.84	1036.19	852.12	1109.79	-0.354108	8.09e-233
Oas2	2.72	4.23	3.9	6.57	24.27	6.29	1.76866	8.23e-232
Rplp0	1960.59	2218.8	1877.43	1963.76	1610.08	1785.52	-0.176077	2.09e-229
Naca	257.76	525.51	674.59	289.56	285.75	519.43	-0.412516	2.61e-229
Grn	148.28	108.72	147.89	175.83	224.58	157.88	0.460893	2.79e-228
Psca	60.43	0.63	0.82	0.57	0.33	0.65	-5.31755	6.15e-228
Atp2a3	196.04	143.66	60.65	93.03	122.29	92.94	-0.381114	1.33e-225
Gm20594	156.92	445.4	586.26	55.66	125.57	438.59	-0.947324	1.81e-223
Rps25	519.78	758.09	874.31	518.75	438.29	640.16	-0.430414	2.34e-223
Rbm25	12.72	44.09	68.74	13.82	18	43.32	-0.746264	4.52e-223
Hnrnpa3	107.58	180.05	238.49	128.01	115.71	203.58	-0.317071	1.12e-221
C3	32.67	29.61	8.11	25.05	81.13	13.08	0.840658	1.23e-221
Stat1	19.78	16.37	16.36	23.97	47.74	25.06	0.874433	1.49e-221
S100a16	468.53	437.37	559.61	362.44	310.64	423.65	-0.40779	1.05e-220
Rpl37a	670.57	1001.8	992.44	659.68	579.11	759.25	-0.415861	1.69e-220
Actb	1363.7	1278.98	1935.17	1541.87	1321.22	1214.95	-0.16534	4.25e-220
Rpsa	920.79	1161.33	1153.23	1049.05	842.79	919.06	-0.201837	7.52e-220
Hsp90b1	107.38	252.3	315.93	118.1	165.2	240.92	-0.370297	4.21e-217
Ubd	9.57	7.44	28.18	26.08	38.54	85	1.72296	6.98e-217
Krt36	99.68	44.72	153.49	61.36	45.37	66.97	-0.766712	3.09e-216
Itm2c	81.96	68.89	64.76	128.05	125.92	82.48	0.641565	6.37e-216
Lgals9	143.81	129.53	146.9	210.05	214.52	182.69	0.534835	3.13e-211
Tns3	38.24	36.07	35.08	58.44	54.09	40.08	0.500339	1.1e-209
Lmna	232.9	154.12	185.21	180.57	128.87	134.73	-0.394874	2.11e-209
Xlr4a	0	0.31	0.18	0.54	0.69	41.34	6.44489	5.04e-207
Emp1	62.07	71.09	48.19	35.1	47.32	25.75	-0.749464	8.9e-207
Slc7a8	9.54	5.23	11.54	28.09	18.56	15.59	1.27191	4.17e-206
Usp18	9.08	4.7	7.94	18.43	39.7	14.9	1.74234	1.32e-205
Klk1	508.68	338.4	126	118.47	249.96	306.31	-0.533764	1.48e-203
Rpl27a	634.3	826.22	945.62	685.22	580.81	690.01	-0.298324	1.94e-203
Ret	3.22	3.57	4.32	10.79	7.83	8.59	1.28267	7.08e-203
Ethe1	120.6	114.56	47.79	40.11	63.14	58.54	-0.813387	2.35e-202
Csf1r	11.87	7.56	6.56	16.29	33.98	9.58	1.19535	4.83e-201
Luc7l3	17.71	75.54	110.07	17.62	26.81	71.75	-0.743767	5.76e-200
2610528A11Rik	218.15	309.89	175.13	104.7	165.13	162.79	-0.706944	6.47e-194
Bmf	10.55	6.18	9.93	21.29	22.52	11.75	1.05719	1.37e-193
Eef2	1265.04	1038.73	725.24	1300.83	1157.39	881.34	0.141005	4.49e-192
Col18a1	25.62	24.77	22.13	42.09	50.47	21.58	0.654135	4.94e-192
Rnf43	50.17	44.45	58.56	82.05	71.42	59.71	0.500175	2.51e-191
Axin2	83.54	63.62	81.86	120.73	102.14	83.19	0.424106	3.92e-191
Mt4	144.17	43.86	60.14	170.88	208.92	192.29	1.2013	3.56e-189
Atp1b1	459.04	386.02	317.07	425.68	438.87	513.62	0.243565	7.11e-188
Ppia	1723.86	1921.11	2289.09	1778.44	1447.9	1859.07	-0.2221	6.95e-186
Xlr3a	0.67	0.31	0.36	0.52	0	28.23	4.37391	1.03e-185
Tmsb10	935.08	1382.4	2010.14	1288	893.55	1326.2	-0.301546	3.39e-184
Gtf2i	67.06	51.96	65.88	89.44	90.19	71.63	0.446685	5e-184
Tnfrsf1b	24.77	21.45	15.27	35.39	38.83	25.73	0.699101	4.93e-183
Prnp	230.75	143.29	101.34	168.7	154.17	267.45	0.308989	6.37e-183
Gprc5a	142.24	121.49	119.09	90.88	101.5	72.09	-0.535167	8.58e-182
Notum	99.68	81.7	160.94	180.74	167.65	112.64	0.462585	2.59e-181
Stra6	75.04	57.48	78.59	118.9	92.53	87.6	0.510078	2.8e-181
Oas3	4.29	3.58	2.37	5.7	18.51	5.15	1.5079	3.25e-180
Lrg1	69.52	129.21	60.32	230.38	50.56	122.58	0.649783	2.25e-179
Eif5b	8.38	27.48	43.31	11.04	13.15	28.08	-0.602259	4.88e-177
Stab1	5.02	3.38	3.86	8.04	14.63	3.97	1.11352	1.95e-174
Tmem176a	132.52	102.49	118.45	222.64	201.5	117.19	0.635649	6.67e-174
Hsp90ab1	1047.99	1175.5	1423.66	1297.36	965.89	1035.46	-0.142644	1.99e-171
Glul	204.15	191.62	147.46	261.01	249.59	168.04	0.321031	6e-171
Slc26a3	28.68	28.44	5.29	3.16	11.68	10.72	-1.26805	5.4e-170
Thbs1	25.15	37.59	29.12	65.33	36.12	29.74	0.520113	5.52e-170
Tlr2	12.08	15.86	15.55	26.67	36.32	23.87	0.995054	4.07e-169
S100a6	1828.81	1282.82	2312	1573.58	1397.33	1670.89	-0.224334	5.21e-169
Aqp4	12.83	46.02	10.42	9.37	14.95	15.6	-0.798187	2.95e-166
Rps28	1198.62	1497.82	1488.35	1139.53	906.6	1149.22	-0.385783	4.82e-166
Zbp1	27.05	29.13	19.15	38.29	70.74	37.32	1.05814	7.74e-166
Shisa5	138.94	121.98	103.13	167.74	200.09	138.63	0.483178	1.11e-165
Khdc1a	15.13	36.37	23.52	29.87	32.47	80.53	0.92437	1.17e-165
Dnaja1	44.81	69.04	122.29	38.14	48.91	79.43	-0.503117	2.11e-165
Anxa1	164.48	242.38	410.34	159.31	160.84	292.05	-0.418527	9.1e-165
Cfb	71.83	46.51	39.35	70.84	87.58	75.37	0.564935	7.47e-164
Ccdc88b	6.1	9.93	12.23	18.87	13.55	22.2	0.972173	2.12e-163
Isg15	24.82	14.11	11.44	29.66	96.77	29.49	1.6187	3.43e-163
Fn1	74.28	61.56	68.05	98.74	96.98	54.79	0.303446	1.17e-162
Rpl18	1730.83	1895.83	1870.66	1738.26	1358.46	1617.76	-0.219791	1.75e-162
Rpl23a	1281.56	1563.03	1740.84	1309.2	1195.77	1283.65	-0.275474	2.19e-162
Rpl14	744.47	814.33	944.54	766.76	598.11	687.97	-0.284882	3.42e-162
Sfn	239.44	205.91	245.11	184.45	130.74	200.98	-0.418646	4.28e-162
Creb3l1	115.19	94.65	32.46	48.32	63.95	47.07	-0.609421	1.03e-160
Rpl13a	1579.66	1557.84	1643.93	1578.2	1353.25	1257.32	-0.190118	2.95e-159
Ifit2	3.57	4.07	5.37	5.5	18.92	10.54	1.40719	1.74e-158
Cxcl5	35.63	24.44	51.89	53.42	51.9	92.46	0.81917	2.33e-158
Rpl36a	491.83	856.92	897.52	513.16	476.88	684.47	-0.424885	5.22e-158
Rpl6	1047.93	1449.18	1549.81	1177.46	1002.36	1304.57	-0.216741	1.87e-157
Rpl5	579.87	945.43	859.41	630.62	598.61	798.81	-0.254218	2.06e-154
Ets2	162.64	134.81	169.25	212.18	175.76	183.81	0.29381	3.51e-154
Htra1	89.36	74.14	96.51	164.84	125.96	76.34	0.501416	1.22e-153
Smc4	6.18	25.64	33.04	5.4	7.39	22.11	-0.898428	8.77e-153
Abat	31.44	13.39	3.7	4.26	10.59	9.87	-0.993842	9.41e-153
Tgfbr2	33.44	33.77	32	48.52	58.44	36.13	0.526484	2.37e-152
Hoxd13	86.59	0.32	88.68	0.48	4.99	105.21	-0.674814	1.06e-151
Arhgef11	21.05	13.48	13.63	18.95	21.35	34.57	0.654661	3.51e-151
Aplp2	123.2	104.72	119.99	161.89	145.26	131.58	0.334847	1.18e-150
Ctss	127.31	122.06	82.25	106.53	209.05	169.76	0.566105	6.93e-150
Reg4	563.35	669.26	336.61	251.36	497.86	504.32	-0.331274	1.23e-147
Rpl30	478.3	957.56	899.61	496.68	486.69	810.87	-0.382218	2.37e-147
Hmgb1	63.73	128.91	162.22	79.41	67.55	119.05	-0.415825	3.15e-147
Krt18	597.26	723.82	967.64	705.77	559.49	687.08	-0.228047	3.67e-147
Myh9	130.62	100.39	95.78	150.01	129.03	106.24	0.238318	1.59e-146
C1s1	19.39	15.94	10.46	18.78	52.65	15.24	0.907505	3.25e-146
Hmgb2	130.99	216.7	240.81	128.72	110.95	169.44	-0.504745	5.39e-146
Rere	57.46	46.84	46.61	74.93	73.14	45.53	0.361023	1.35e-145
Ube2c	97.9	129.82	162.53	94.32	64.82	74.04	-0.73991	5.11e-145
Defa37	69.66	70	17.34	115.17	155.58	112.13	1.281	5.9e-145
Rpl35	1139.73	1360.93	1576.65	1190.51	939.62	1155.22	-0.310519	6.2e-144
Rpl13	1425.15	1508.85	1503.29	1387.13	1182.67	1247.59	-0.216689	8.87e-144
Idh1	83.16	143.51	137.99	159.01	124.72	195.92	0.395506	2.24e-143
H2afz	367.82	430.75	546.74	360.44	280.3	418.55	-0.344046	3.8e-143
Rpl10a	979.83	1315.53	1148.21	1009.82	875.69	1033.91	-0.239303	3.83e-143
Ifit3	5.99	4.42	4.31	7.23	24.94	15.37	1.68977	7.94e-143
Neurl3	56.08	55.16	33.65	74.29	81.81	59.81	0.568294	8.14e-143
Hmgn2	201.64	261.74	370.32	241.56	174.29	212.14	-0.406283	9.4e-143
Fth1	1698.66	1516.93	1351.32	2069.35	1724.5	1379.5	0.181104	6.11e-142
H6pd	14	13.34	15.51	29.35	23.62	18.5	0.744753	3.11e-141
Ybx3	193.03	199.44	213.3	158.77	120.12	177.12	-0.406469	5.36e-141
Fam46c	12.8	8.59	7.51	16.42	24.87	11.78	0.855357	1.18e-140
Tns4	36.21	39.72	37.95	70.23	45.62	42.06	0.475563	1.21e-140
Lgmn	51.25	52.88	37.38	71.94	99.04	53.28	0.659199	3.5e-140
Irgm2	15.22	10.21	7.15	16.15	34.2	12.88	0.948208	7.03e-140
Zfp488	15.43	45.02	56.14	17.2	23.36	37.08	-0.590827	2.94e-139
S100a11	1098.1	1279.06	2538.56	1541.52	924.23	1631.64	-0.259258	1.59e-138
Sema3f	33.04	21.35	28.21	53.29	45.24	30.1	0.655527	2.45e-138
Rplp1	2400.23	2729.45	2406.35	2413.65	2055.32	2016.88	-0.216012	2.54e-138
Spp1	6.6	87.38	112.42	32.02	7.7	78.23	-0.80465	4.35e-138
Uba52	1908.97	2074.75	2015.47	1819.5	1573.25	1729.44	-0.227924	6.56e-138
Duoxa2	71.47	65.24	106.63	135.44	127.82	93.52	0.553258	1.1e-137
Mzb1	8.11	2.36	0.83	7.66	50.6	3.99	2.43643	1.32e-137
Slc9a3	22.38	54.15	41.89	69.01	50.6	41.08	0.442418	2.29e-137
Ckmt1	778.26	604.78	398.62	427.22	508	570.45	-0.240431	3.83e-136
Smpdl3a	124.63	97.1	49.04	85.57	146.14	151.89	0.495137	7.46e-136
Rps27a	562.53	941.61	927.76	610.2	563.53	802.5	-0.301927	7.51e-136
Timp2	39.2	21.77	23.32	41.44	60.11	27.19	0.607217	1.53e-135
Cxcl14	33.07	31.16	51.45	63.31	79.86	48.1	0.723215	1.8e-135
Dkk3	14.9	15.09	18.19	31.93	35.9	16.53	0.808035	1.95e-135
Ccnd2	63.18	52.75	63.85	27.51	50.51	60.74	-0.381379	2.68e-135
Pisd	117.18	116.26	102.29	157.66	141.62	140.69	0.401157	3.1e-135
Dynll1	111.39	114.72	190.33	94.55	90.98	122.02	-0.438009	9.66e-135
Tppp3	64.93	9.92	13.45	4.21	19.76	4.9	-1.55061	6.81e-134
Rpl31-ps12	263.86	325.84	377.64	213.36	183.72	230.04	-0.625188	1.01e-133
Gm40498	2.14	4.3	0.28	0.8	24.99	0.11	1.92261	1.46e-133
Rpl35a	703.31	838.37	988.56	719.19	603.83	643.19	-0.359609	3.52e-133
Cdh1	315.93	280.18	249.07	387.56	283.31	288.38	0.184555	4.31e-133
Scd2	484.78	293.2	259.71	321.21	219.77	388.19	-0.159326	7.49e-133
Prrc2b	29.97	21.38	23.43	37.31	37.19	24.15	0.418449	1.05e-130
Onecut2	0.62	6.12	6.57	2.45	1.52	2.52	-1.03312	2.72e-130
Aldh1a3	34.55	31.8	42.73	57.59	26.3	74.96	0.545167	3.45e-130
Rpl8	1265.64	1320.45	1163.64	1214.44	944.34	1070.56	-0.21462	4.12e-130
Fgfrl1	40.4	29.58	45.87	70.3	56.75	50.25	0.61261	3.11e-129
Ltbp4	37.3	17.36	11.42	29.66	54.25	15.03	0.576122	4.76e-129
Il4ra	26.12	32.6	25.53	56.92	37.11	29.07	0.584838	6.92e-129
Hao2	24.03	36.77	8.11	5.51	12.11	11.9	-1.21336	2.1e-128
Tuba1b	449.53	392.38	387.07	425.08	265.55	332.25	-0.259746	5.6e-128
B4galt1	69.01	63.88	70.71	95.33	75.21	93.49	0.391513	7.81e-128
H2-T23	134.54	97.31	88.72	126.01	211.42	123	0.514287	8.77e-128
Tpm3	260.71	253.01	151.15	338.6	253.73	211.51	0.29311	1.18e-126
Rps14	1390.77	1906.64	1529.32	1345.27	1179.53	1609.84	-0.224262	9.39e-126
Tbx3	22.68	25	39.88	44.1	44.31	36.56	0.512036	2.3e-125
Parp14	8.03	8.89	8.15	7.41	21.78	12.7	0.729956	5.22e-123
Scube1	5.29	4.47	4.59	9.17	11.88	6.63	0.940473	6.68e-123
Tmem254b	282.44	237.99	254.89	242.57	149.35	194.47	-0.369129	7e-123
Slc6a14	17.35	41.21	10.69	8.59	14.25	15.95	-0.843468	7.64e-123
Pwwp2a	6.27	20.48	31.29	6.02	8.84	18.4	-0.80317	8.4e-122
Zfp703	49.04	49.07	45.46	77.57	62.35	60.21	0.480288	1.39e-121
Oas1a	57.45	38.19	27.21	47.65	107.67	49.86	0.710546	2.64e-121
Ppig	4.23	17.76	27.9	4.37	5.47	20.2	-0.723778	4.71e-121
Cyp2f2	26.35	3.4	0.82	0.71	1.93	4.18	-2.17645	5.19e-121
Cd38	60.49	62.91	42.02	73.67	73.44	80.96	0.461295	7.33e-121
Calm1	196.65	247.07	297.7	178.66	191.86	272.39	-0.208148	1.44e-120
Ddx58	6.54	4.38	6.8	8.63	18.69	8.16	0.995286	2.18e-119
Gpnmb	3.52	2.09	0.45	3.43	5.54	11.03	1.71308	3.4e-119
Col4a1	44.59	46.48	41.93	68.21	71.26	29.81	0.348578	3.1e-118
Ifit1	3.8	7.18	4.8	5.21	23	12.42	1.35169	8.92e-118
Adamts15	19.73	9.47	4.09	5.31	6.82	4.73	-0.971284	1.21e-116
Gpx3	56.75	50.64	68.14	92.28	117.95	57.63	0.608026	1.53e-116
Scn2b	15.48	3.7	12.09	14.2	21.5	19.06	0.803248	1.97e-116
Rpl7a	1083.2	1235.67	1315.39	1126.59	921.66	1103.62	-0.204697	7.43e-116
Coro1a	20.25	13.08	14.42	26.52	53.46	17.53	1.02308	8.6e-116
Rpl31	311.55	480.3	547.83	337.73	312.4	429.69	-0.309853	1.82e-115
Eif2s2	35.14	139.3	155.45	45.47	62.81	141.42	-0.406885	2.11e-115
Top2a	30.12	48.11	54.08	28.24	25.56	43.34	-0.446955	3.11e-115
Kpna2	84.76	114.62	123.58	71.65	68.01	95.85	-0.456947	4.25e-115
Cox4i1	830.21	850.58	762.98	665.28	605.47	721.06	-0.274768	7.19e-115
Ddx60	1.52	2.04	1.33	1.63	8.97	4.66	1.65852	1e-114
Rpl4	742.75	1189.31	1005.31	797.66	795.82	1012.7	-0.174427	1.02e-114
Rpl19	1294.79	1401.42	1621.18	1385.61	1131.01	1225.99	-0.201672	1.03e-114
Sema7a	16.04	25.72	26.41	54.8	28.18	23.48	0.647155	3.49e-114
Lcn2	86.12	133.03	197.64	339.79	111.81	146.67	0.532743	3.94e-114
Tnrc18	21.41	13.33	13.36	23.77	26.01	15.62	0.451191	2.94e-113
Cox6a1	1012.7	995.63	891.07	801.77	774.87	783.88	-0.297697	3.41e-113
Muc13	920.13	926.27	700.65	748.8	963.66	1062.44	0.125129	3.57e-113
Gm2260	3.87	28.66	24.89	4.31	3.78	13.59	-1.40916	3.87e-113
Gm2274	3.87	28.66	24.89	4.31	3.78	13.59	-1.40916	3.87e-113
Ccdc3	28.61	40.8	31.47	71.49	35.23	43.85	0.583418	6.01e-113
Col3a1	84.86	84.28	91.99	88.76	166.86	60.27	0.268897	1.11e-112
Ahnak	83.04	81.16	77.2	59.07	65.39	79.18	-0.2079	2.07e-112
Rpl39	691.54	905.35	1050.06	727.27	588.56	760.02	-0.349958	3.16e-112
Oasl1	20.6	11.82	10.39	18.77	44.42	20.2	0.955338	9.57e-112
Stom	60.55	65.6	46.3	87.07	87.05	61.52	0.449634	2.04e-111
Abhd12	49.49	42.25	39.95	75.95	67.13	58.99	0.624952	1.28e-110
St3gal4	43.9	54.63	16.85	27.61	60.79	23.07	-0.600236	2.26e-110
Plp2	282.61	279.26	338.65	238.26	210.12	257.77	-0.350951	2.95e-110
Rpl15	1017.08	1108.07	1280.51	1062.5	826.82	1049.97	-0.209756	1.47e-109
S100a14	363.95	388.61	512.99	338.1	281.54	404.02	-0.306158	1.81e-109
Ifitm1	128.41	125.08	174.99	186.45	233.97	222.68	0.610491	2.39e-109
Lama5	16.21	14.77	23.68	27.26	26.24	18.35	0.394046	4.29e-109
Ccdc34	16.35	48.46	63.41	22.07	16.31	38.28	-0.734509	4.42e-109
Eef1a1	3823.24	4947.85	4201.06	4140.53	3917.03	4306.34	-0.0702517	1.38e-108
Sdc1	162.12	135.49	138.55	230.11	158.9	131.35	0.279171	1.57e-108
Atp5g3	747.04	636.8	608.79	548.01	477.54	597.06	-0.296524	5.1e-108
Rpl27	511.35	723.11	856.29	585.22	441.29	686.12	-0.287024	5.41e-107
LOC105247125	1.3	1.61	2.29	3.87	6.63	5.21	1.78221	1.07e-106
Ifit3b	2.06	1.56	3.53	4.19	12.65	11.19	1.96499	5.8e-106
B4galnt2	39.7	68.69	15.77	66.95	66.97	34.23	0.429481	6.62e-106
Hjurp	52.57	50.1	52.29	38.23	43.72	35.19	-0.420656	1.72e-105
C1ra	14.57	7.44	7.21	12.48	34.9	10.55	0.976749	6.21e-105
Btf3	417.62	606.92	740.72	488.45	402.31	567.09	-0.275377	2.8e-104
C4b	18.21	7.68	2.9	7.73	34.56	5.88	0.727961	3e-104
Dtx3l	14.54	14.78	16.22	17.14	31.18	21.2	0.604356	8.04e-104
Nans	208.87	203.78	119.62	137.24	133.51	148.71	-0.345688	8.92e-104
C4bp	7.73	7.38	8.6	13.34	25.71	17.13	1.27626	5.32e-103
Rpl32	1330.65	1498.55	1543.75	1353.03	1099.73	1260.14	-0.235323	9.82e-103
Rps5	1194.9	1372	1302.78	1263.94	1016.59	1089.24	-0.198604	1.18e-102
Slc30a2	43.7	37.42	44.66	54.99	63.34	56.37	0.475743	1.27e-102
LOC108169093	38.12	10.89	9.44	24.62	57.61	10.01	0.64898	2.06e-102
Ccar1	7.21	29.92	37.9	8.15	12.49	27.09	-0.645309	2.35e-102
Erbb3	31.9	21.26	8.51	35.06	40.16	17.57	0.587248	2.64e-102
Gpc1	35.41	21.74	36.81	49.07	47.14	37.21	0.525314	5.12e-102
Hmgcs1	67.22	72.24	74.42	46.17	41.46	74.51	-0.401999	6.75e-102
Stmn1	262.69	338.66	425.98	314.34	215.27	285.92	-0.330616	7.59e-102
Tubb4b	361.39	328.86	325.37	304.13	242.42	297.06	-0.267248	8.36e-102
Hsph1	39.31	28.51	48.54	21.18	26.99	28.85	-0.580237	8.47e-102
Podn	9.59	3.76	10.24	10.73	20.38	16.64	1.07387	9.26e-102
Rpl29	792.84	968.42	969.92	784.5	678.62	862.72	-0.231551	1.06e-101
Cox8a	812.21	968.73	898.49	707.46	676.16	810.69	-0.289405	1.21e-101
Rps15a	60.79	83.66	92.7	64.18	55.37	72.08	-0.307525	1.23e-101
Rpl22	138.12	203.38	220.34	153.67	134.43	164.59	-0.310182	1.99e-101
Gm7861	3.66	2.29	1.56	9.5	71.35	8.88	3.56216	2.22e-101
Ang4	162.12	104.89	106.37	101.55	391.14	72.14	0.584493	2.77e-101
Itm2b	362.19	286.12	268.76	303.19	443.04	342.7	0.243126	6.9e-101
Rpl10	1279.67	1647.06	1672.85	1295.39	1220.15	1558.28	-0.176222	7.96e-101
Cxcl16	25.33	21.34	24.67	43.05	57.26	24.72	0.778044	1.13e-100
Pfn1	1348.88	1166.14	1582.95	1335.57	1110.29	1176.48	-0.176948	1.21e-100
Cox7c	579.74	771.77	815.05	530.86	451.32	707.46	-0.359394	2.46e-100
Hint1	505.46	472.73	451.76	385.36	328.59	378.4	-0.388592	2.89e-100
Krt4	23.07	2.11	1.33	1.46	1.6	4.3	-1.8545	9.63e-100
Ssb	21.9	67.9	103.05	24.72	29.72	76.98	-0.557909	1.49e-98
Rdh10	47.39	52.53	54.86	89.63	61.17	66.35	0.49137	1.56e-98
Sephs2	40.62	44.4	31.87	51.41	69	53.26	0.567115	8.44e-98
Znfx1	18.62	10.78	11.22	17.09	28.85	14.03	0.629387	1.02e-97
Rps26	1103.82	1398.93	1487.1	1197.24	1004.01	1143.05	-0.254062	1.11e-97
Hspd1	102.44	174.38	153.59	108.06	89.85	143.95	-0.332732	9.71e-97
Col6a1	29.05	14	16.52	21.64	55.71	12.43	0.582902	1.81e-96
Rdh9	35.68	34.59	37.41	49.11	53.06	53.66	0.531346	8.24e-96
Hk2	44.4	48.05	33.39	54.22	57.1	53.7	0.356188	2.82e-95
Rpl9	924.53	1230.37	979.12	920.86	805.51	969.7	-0.217703	4.1e-95
Mafb	7.35	6.03	4.08	11.63	18.99	6.08	1.06609	6.56e-95
Ctnnd1	126.34	112.85	96.31	150.59	130.73	111.24	0.228218	1.07e-94
Cela1	234.72	128.7	73.34	100.17	79.27	132.06	-0.489455	1.08e-94
Helz2	12.14	7.45	7.09	11.33	20.37	7.34	0.543417	1.58e-94
Nr1d1	3.81	9.08	5.93	11.38	23.53	6.24	1.12108	2.12e-94
Lcp1	12.94	16.91	13.55	22.13	34.91	13.86	0.701708	6.05e-94
Ccna2	28.48	46.3	43.6	26.81	21.91	29.6	-0.59508	8.76e-94
Cox7b	90.55	166.41	174.23	74.2	88.99	147.46	-0.476912	2.64e-93
Sltm	10.48	38.38	55.17	13.09	16.04	38.51	-0.609899	8.35e-93
Ptn	27.72	24.5	32.57	43.87	50.11	51.12	0.787988	8.8e-93
Krt6b	9.58	0.09	0.28	0.29	0	0.15	-4.48086	2.26e-92
Cdh13	9.9	9.73	11.41	20.02	19.29	13.95	0.790688	6.26e-92
Wnt6	20.9	6.56	23.11	29.08	36.3	24.15	0.824494	6.69e-92
Rec8	12.99	22.26	0.23	27.59	28.73	14.75	0.980883	7.57e-92
Ube2s	188.14	183.62	234.62	177.04	127.36	144.38	-0.431836	2.81e-91
Igtp	10.9	7.07	6	10.91	30.97	11.09	1.1335	3.37e-91
Serbp1	45.04	74.51	90.8	52.82	44.81	76.92	-0.270021	5.2e-91
Tmsb4x	844.09	1206.11	2466.24	1105.9	1209.35	1666.74	-0.185062	6.31e-91
Rps13	860.88	1018.49	1013.89	880.19	736.16	812.74	-0.251744	7.17e-91
Col6a4	2.23	1.82	2.42	5.14	7.48	1.72	1.13859	7.67e-91
Ablim1	31.57	32.19	32.78	38.84	45.83	40.66	0.37319	1.87e-90
Tmem64	19.68	20.39	19.11	28.97	26.9	29.39	0.525944	6.14e-90
Aspa	9.42	11.64	14.33	17.23	29.01	30.17	1.10094	6.46e-90
Stxbp1	57.83	46.35	78.71	92.91	68.21	69.79	0.339315	1.09e-89
Hnrnph1	66	138.72	221.79	89.5	98.28	146.18	-0.345801	1.84e-89
Txn1	452.71	874.55	729.3	495.2	538.38	740.29	-0.21614	3.41e-89
Slc13a2	26.88	38.59	6.14	11.19	21.27	4.86	-0.938452	5.68e-89
Rps15	1409.24	1560.19	1524.54	1440.92	1173.98	1269.06	-0.210385	8.78e-89
Hnrnpa2b1	200.2	285.95	379.76	237.67	207.69	286.67	-0.23926	9.83e-89
Aqp8	54.01	45.49	3.83	10.49	38.95	6.24	-0.906817	1.08e-88
Rps4x	940.46	1365.28	1125.29	985.77	939.01	1107.05	-0.179369	2.17e-88
Zc3h12a	40.01	25.95	29.86	47.02	50.99	40.53	0.53017	2.31e-88
Atp1a2	2.62	0.89	2.27	5.12	5.65	3.17	1.26994	2.39e-88
Hmha1	4.24	4.13	4.93	6.54	18.4	4.65	1.1389	2.44e-88
Nov	24.19	42.39	5.71	8.92	13.07	18.56	-0.841697	5.34e-88
Tfrc	26.84	43.95	36.77	22.08	18.78	38.28	-0.44428	1.25e-87
Slc41a1	19.52	16.18	17.89	29.22	27.26	21.53	0.542002	6.77e-87
Slc16a1	47.27	34.63	16.51	20.83	23	26.36	-0.491229	7.38e-87
Cenpe	1.57	5.69	7.28	1.69	1.59	3.71	-1.05857	1.65e-86
Nt5e	31.76	40.49	31.02	34.2	53.55	54.06	0.451845	3.44e-86
Col6a2	29.12	12.95	16.86	20.14	56.11	11.3	0.568303	4.58e-86
Agrn	25.34	19.38	26.11	31.16	32.24	29.48	0.402567	5.73e-86
Ly6c2	4.06	1.99	1.15	3.97	34.13	2.36	2.47258	7.81e-86
Igfbp2	12.77	4.22	0.24	2.38	44.94	2.93	1.59328	8.8e-86
Rhob	182.49	156.14	201.98	268.87	195.26	180.42	0.256638	1.61e-85
C2	4.63	2.58	3.58	8	12.36	7.81	1.37946	3.42e-85
Mfge8	83.04	61.62	60.43	87.89	110.56	75.93	0.422142	3.53e-85
Il1rl1	27.37	24.58	31.22	26.78	7.76	17.66	-0.642394	3.77e-85
Rpl36	601.2	652.29	745.01	479.61	487.18	600.52	-0.35271	5e-85
Sqstm1	130.79	108.69	107.45	152.69	174.85	110.1	0.333882	1.17e-84
Siglec15	2.29	1.29	1.25	8.87	7.48	2.66	1.99249	2.34e-84
Itgax	3.58	2.67	2.74	6.38	11.57	3.43	1.24456	2.71e-84
Unc93b1	32.81	25.94	25.62	38.69	57.87	32.73	0.610322	8.28e-84
Dhx58	7.45	5.38	3.18	7.26	22.49	7.51	1.20752	1.04e-83
Dek	17.08	44.81	53.12	14.17	18.1	44.18	-0.593952	1.14e-83
Cdk1	24.07	28.65	35.86	21.59	14.99	19.71	-0.651607	1.46e-83
Me1	4.45	12.4	8.95	20.15	15.23	11.95	0.88057	1.54e-83
Defa34	13.39	9.94	8.9	27.61	46.96	52.66	1.97412	2.01e-83
Gm7849	7.97	12.15	6.11	11.2	67.79	23.93	1.95653	2.61e-83
Kif23	10.15	20.22	28.7	9.65	8.66	16.43	-0.750033	2.67e-83
Top1	14.89	47.97	64.41	17.63	21.47	54.31	-0.45056	2.7e-83
Mmp2	22.88	22.12	16.16	31.35	42.46	19.47	0.605666	4.26e-83
Ubb	1506.98	1336.91	1809.11	1651.21	1546.37	1797.54	0.118247	1.15e-82
Eif3a	25.91	70.4	81.78	32.97	40.35	69.77	-0.319265	2.17e-82
Vcam1	3.3	2.33	1.51	4.86	11.79	2.96	1.45044	2.56e-82
C130074G19Rik	32.22	26.54	37.73	46.22	47.94	43.04	0.507023	2.75e-82
Hspe1	127.59	186.31	228.99	141.05	99.18	145.44	-0.491464	5.44e-82
Ctnnb1	288.66	328.91	333.65	333.57	335.96	385.12	0.154892	6.53e-82
Mgst3	504.24	314.38	300.15	249.97	308.2	306.53	-0.37537	8.52e-82
Krt20	184.8	251.82	172.71	129.71	187.71	186.34	-0.279669	1.17e-81
Manf	86.87	80.15	115.72	61.87	66.91	86.83	-0.39315	1.23e-81
Nupr1	118.27	274.56	251.37	142.45	134.55	177.96	-0.502867	2.3e-81
Slc44a4	205.09	185.08	114.53	185.22	214.16	204.95	0.256786	3.84e-81
Banf1	145.52	205.41	267.33	161.22	109.82	166.84	-0.445744	4.88e-81
Atp5o	374.62	366.81	390.87	293.02	265.67	341.34	-0.33208	8.18e-81
Hmgn5	6.53	33.83	45.2	6.67	7.4	34.42	-0.824078	1.01e-80
Arap1	25.96	20.79	23.81	31.02	39	23.62	0.504823	1.33e-80
Gbp2	15.2	5.84	5.1	10.3	24.79	16.03	0.957908	2.09e-80
Ak4	2.36	3.68	2.65	6.67	8.33	5.21	1.21212	3.97e-80
Tnfrsf11b	24.81	30.46	47.98	49.36	42.97	52.44	0.488362	4.85e-80
Sema4g	104.48	96.01	55.36	54.16	88.52	68.12	-0.285752	6.58e-80
Tap1	21.89	12.62	9.58	17.04	40.06	15.14	0.70245	7.31e-80
Acsm3	20.37	25.52	7.96	5.6	12.59	11.15	-0.881463	9.63e-80
Muc4	6.84	8.81	5.05	14.23	9.42	6.28	0.536119	1.43e-79
Hmgcs2	10.04	46.74	24.81	43.41	42.95	29.39	0.504202	1.78e-79
Usmg5	254.92	466.59	624.91	266.6	239.27	475.6	-0.457554	3.63e-79
Cdca3	43.58	59.72	63.32	41.07	30.73	35.11	-0.63902	3.76e-79
Gbp3	2.21	3.22	3.33	4.17	13.04	6.88	1.45992	3.88e-79
Ptprj	16.43	16.71	12.35	24.07	24.04	14.16	0.456887	6.08e-79
Gm42102	38.23	16.66	2.97	44.47	18	29.15	0.676543	6.42e-79
Emilin1	12.94	8.12	7.6	16.26	25.8	7.53	0.784129	6.43e-79
Lrp1	13.15	7.24	4.35	11.27	16.28	5.92	0.431888	9.02e-79
Trpm6	5.79	3.06	1.88	1.09	1.46	1.63	-1.35113	1e-78
Mov10	13.48	10.12	11.24	15.98	26.57	14.82	0.720851	1.25e-78
Stip1	107.02	86.67	153.98	96.79	74.41	101.73	-0.34779	1.27e-78
Lamp1	253.56	210.71	180.19	266.34	273.46	215.16	0.227171	2.46e-78
Cfh	1.43	2.29	1.55	3.4	5.72	5.34	1.45004	2.64e-78
Anxa2	972.1	873.24	1288.85	1075.13	799.4	966.05	-0.140567	2.88e-78
Rpl18a	731.45	799.81	704.95	738.79	647.53	596.75	-0.172968	3.78e-78
Gm22	1.25	0.87	1.3	3.54	2.92	0.86	1.10836	4.63e-78
Abhd2	44.53	24.72	8.4	38.86	50.28	24.21	0.541521	6.96e-78
Mgat4c	7.57	39.36	11.13	8.36	14.79	13.38	-0.673394	2.16e-77
Hist1h2ap	2.49	188.92	228.73	1.23	3.94	243.53	-0.764916	2.56e-77
H2-Q4	52.24	48.79	54.48	47.28	107.78	64.79	0.491543	2.64e-77
Fau	1193.99	1384.83	1231.24	1156.48	1067.35	1087.68	-0.202176	3.12e-77
Ubr4	20.88	13.5	13.32	21.48	23.67	13.81	0.30439	5.15e-77
Pik3ap1	6.04	3.92	5.31	11.93	13.06	6.28	0.981774	7.28e-77
Igfbp7	157.27	115.7	137.37	191.67	236.52	110.39	0.390741	7.78e-77
Gns	45.85	38.3	36.04	56.34	60.87	39.83	0.384668	1.09e-76
Dlk1	5.48	1.08	0.79	7.13	6.84	13.52	1.88195	1.12e-76
Srsf11	35.53	67.27	90.86	36.81	41.9	65.26	-0.397183	1.25e-76
Fcgr3	11.24	11.77	10.59	20.38	34.46	17.04	1.09248	2.58e-76
H2-Q9	6.96	3.08	5.44	6.49	29.09	6.34	1.42358	2.83e-76
Pyy	127.02	91.16	103.13	46.56	55.95	85.32	-0.778864	3.32e-75
Trim25	28.28	25.41	17.72	26.92	46.31	21.68	0.407518	7.66e-75
Ldha	757.05	689.4	579.58	654.28	516.16	648.25	-0.155318	1.77e-74
Rps9	1665.09	2000.38	1824.67	1783.11	1530.45	1648.52	-0.146167	2.41e-74
Muc1	17.21	13.09	19.16	44.83	11.92	24.76	0.731289	2.69e-74
Plpp3	9.76	7.84	6.65	12.45	22.95	8.76	0.857812	2.9e-74
Parp9	17.95	20.78	22.43	20.2	38.18	32.51	0.57291	3.53e-74
Ifngr2	119.89	123	111.25	153.08	144.14	140.75	0.305877	4.51e-74
Rhoc	195.09	182.95	190.77	237.13	259.78	220.94	0.333967	1.19e-73
Pgd	224.08	229.24	202.24	285.72	212.56	252.51	0.23841	1.41e-73
Ndst1	25.25	16.4	12.75	27.61	25.11	19.64	0.41716	1.41e-73
Klhl24	6.75	11.38	8.98	12.72	15.26	11.23	0.529245	1.8e-73
Cct8	54.74	99.92	138.43	62.51	57.27	110.67	-0.34834	2.52e-73
Itgal	1.49	1.37	1.13	3.32	6.48	1.3	1.46971	4.3e-73
Fat1	27.78	18.98	12.96	25.91	29.29	17.28	0.27704	4.5e-73
Ybx1	446.88	498.3	493.82	448.43	340.92	477.34	-0.177685	8.78e-73
Ggt1	2.32	2.84	3.21	12.96	7.72	3.28	1.54534	1.45e-72
Cldn8	39.35	30.13	10.05	9.64	16.07	23.17	-0.710513	1.96e-72
Serpina3n	32.26	10.32	3.25	13.76	56.01	9.17	0.771012	3.13e-72
Dusp4	20.54	13.7	9.5	34.14	23.79	14.58	0.732894	1.21e-71
Ezr	210.66	139.75	146.78	149.9	150.31	124.65	-0.227722	1.6e-71
Ppa1	161.74	135.02	109.11	96.39	82.61	128.12	-0.403747	1.87e-71
Ifi44	1.25	1.76	1.25	1.77	10.19	2.79	1.79323	2.35e-71
Prox1	20.34	23.35	43.09	33.11	34.96	40.59	0.318666	4.05e-71
Rorc	36.81	8.55	8.61	6.37	10	14.12	-0.87487	4.24e-71
Slc5a8	19.58	20.61	3.29	4.94	15.4	8.17	-0.620746	4.72e-71
Trim14	18.43	12.39	11.26	20.53	28.61	17.84	0.663041	6.51e-71
Thbd	8.76	6.62	5.74	11.92	19.8	5.96	0.830769	8.81e-71
Pltp	10.39	3.7	2.53	6.1	29.58	4.36	1.25294	1.4e-70
Serping1	47.95	23.24	22.49	35.34	84	22.25	0.58721	1.51e-70
Rpl22l1	113.82	279.51	312.55	135.8	126.63	226.9	-0.521317	1.62e-70
Stard10	461.47	394.41	307.23	339.06	343.07	304.03	-0.233645	2.75e-70
Abcc4	15.68	17.23	17.35	25.23	22.31	21.78	0.468529	4.09e-70
Ldlr	61.45	36.36	32.9	37.32	27.36	36.46	-0.369437	4.27e-70
Selplg	5.38	4.54	3.38	10.08	18.63	4.47	1.31819	5.95e-70
Tmcc3	30.26	45.04	32.68	49.05	46.75	39.5	0.327377	6.21e-70
Cenpf	1.51	4.46	4.93	1.57	1.8	2.48	-0.903965	6.39e-70
Tuba1a	165.83	90.07	146.27	202.49	149.77	148.24	0.317991	7.78e-70
Kpnb1	53.79	69.46	77.63	55.96	46.86	65.45	-0.255579	8.8e-70
Ddr1	94.89	77.04	99.34	134.27	97.11	90.86	0.255395	1.11e-69
Sec62	10.78	40.14	55.98	12.05	16.77	43.12	-0.480625	1.11e-69
Basp1	21.11	38.6	80.29	87.8	40.78	66.21	0.48361	1.39e-69
Tmem173	46.07	37.69	62.66	87.42	60.66	53.16	0.450352	2.87e-69
Tle3	32.12	23.25	28.31	37.5	43.29	28.2	0.378686	3.14e-69
Col4a2	34.08	28.41	24.82	44.53	46.1	19.34	0.33312	3.18e-69
Gm14851	0.7	1.08	0	1.56	28.4	9.99	4.46388	3.88e-69
Mmp9	13.33	7.49	7.7	24.59	19.98	3.94	0.770549	4.98e-69
Gnas	500.12	528.9	815.94	524.14	519.97	548.97	-0.160794	5.82e-69
Erh	171.51	271	365.61	215.51	146.69	269.21	-0.353357	8.77e-69
Irgm1	18.81	18.86	17.18	19.28	41.13	27.91	0.687227	1.12e-68
Plac8	536.9	681.72	654.37	588.84	715.29	894.48	0.226111	1.21e-68
Eln	9.01	3.75	1.34	5.08	20.47	2.37	0.992254	1.56e-68
Tgm4	1.73	9.81	2.04	8.03	18.38	3.5	1.12007	1.76e-68
Apol9b	4.32	3.79	1.79	6.65	21.09	2.85	1.61242	1.98e-68
Hmga1	163.1	168.65	192.35	164.89	122.47	136.35	-0.297682	2.68e-68
Uqcrh	304.28	477.34	411.45	271.42	278.46	386.09	-0.35251	2.95e-68
Mafg	31.99	34.03	47.92	52.95	48.83	37.65	0.313406	6.29e-68
Wbp5	47.99	122.22	139.89	53.76	57.6	105.39	-0.519549	6.84e-68
Ddit4	142.64	98.95	118.38	203.95	117.06	127.16	0.32082	1.36e-67
Gsta4	74.03	85.76	115.36	56.06	37.95	91.52	-0.568567	1.79e-67
Kif1a	1.91	0.78	1.07	3.58	3.43	1.68	1.20588	2.93e-67
Ephb6	18.67	13.61	16.32	27.51	24	19.91	0.556216	3.28e-67
Vsir	4.96	2.79	1.88	5.09	11.79	2.7	1.01502	3.37e-67
Hdgf	175.37	200.53	232.64	192.4	138.82	180.64	-0.236182	3.74e-67
Eaf2	39.36	16.49	16.31	43.6	14.62	58.8	0.697366	3.97e-67
Dirc2	17.17	19.27	16.41	28.4	25.72	20.05	0.489355	4.42e-67
Tcp1	89.22	141.64	167.64	101.67	86.19	139.62	-0.276874	4.68e-67
Tnfaip3	14.98	9.31	8.35	14.98	20.92	14.1	0.618473	1.56e-66
Wnt10a	16.72	2.33	15.61	15.64	29.13	18.39	0.860144	2.34e-66
Sp100	9.7	7.16	6.06	8.02	24.03	9.66	0.898673	3.93e-66
Itgb2	6.03	5.05	4.44	10.23	16.92	4.56	1.03505	4.54e-66
Csrp2	180.17	167.44	140.69	131.96	119.85	110.36	-0.431311	4.55e-66
Ctsa	58.76	61.09	65.92	79.01	86.63	65.21	0.313394	4.85e-66
Atp5g1	330.51	313.28	290.84	252.09	210.55	284.89	-0.322275	6.12e-66
Mep1a	33.82	15.86	4.45	8.33	14.54	9.89	-0.733969	6.12e-66
Tra2a	45.93	87.43	127.81	44.31	63.8	92.38	-0.389883	1.15e-65
Gm11127	15.72	5.58	6.7	4.02	4.47	52.24	1.10771	2.31e-65
Nlrp6	31.81	21.53	10.35	11.53	20.06	12.73	-0.531296	3.54e-65
Psmb8	52.05	27.92	25.45	39.35	81.64	45.07	0.64776	4.16e-65
Fosb	4.8	1.41	8.85	2.65	1.69	1.35	-1.39685	8.68e-65
Rpl24	585.36	723.91	845.91	655.53	542.9	645.06	-0.224661	9.27e-65
Hcls1	6.87	5.79	6.06	12.71	20.03	7.3	1.09233	1.82e-64
Dnajc2	11.34	39.55	54.38	13.63	14.61	40.49	-0.618688	2.13e-64
Tyms	18.52	24.27	32.66	15.62	13.26	23.69	-0.522036	2.63e-64
Nectin4	9.93	7.74	12.34	19.23	14.6	14.92	0.701387	2.63e-64
Gpr182	5.67	3.1	5.35	11.88	11.54	11.95	1.3238	2.64e-64
Rpl21	119.99	178.19	156.05	115.94	117.02	138.47	-0.291182	4.85e-64
Nme2	340.33	377.1	442.29	348.23	249.57	331.66	-0.286794	5.07e-64
Tubb5	322.5	299.25	374.48	344.98	208.46	335.22	-0.162116	5.11e-64
Bcl2l11	7	7.91	9.23	13.52	14.42	10.54	0.659783	6.84e-64
Furin	49.69	43.23	39.69	72.47	50.35	42.31	0.322521	7.88e-64
Txnrd1	120.29	134.8	121.12	154.45	128.11	152.31	0.218292	9.71e-64
Smoc2	69.29	68.92	80.2	90.11	84.65	95.66	0.307325	1.24e-63
Epcam	721.97	950.94	1029.63	879.12	722.87	900.76	-0.110289	1.4e-63
Kcne3	133.28	211.3	234.92	168.25	91.45	177.17	-0.322652	1.4e-63
Cenpa	35.35	52.97	58.04	36.15	28.03	24.72	-0.696754	2.13e-63
Ly6d	88.89	76.41	110.39	99.92	182.72	119.54	0.539011	6.59e-63
Ctsc	23.53	18.26	14.4	29.89	33.92	19.7	0.416584	8.56e-63
Fxyd6	49.38	44.46	69.68	92.32	55.12	72.83	0.433968	1.09e-62
Fam210b	27.32	23.06	25.02	40.45	32.85	32.36	0.48598	1.13e-62
Fosl2	47.35	36.03	38.71	56.38	50.81	41.32	0.282928	1.55e-62
Chp1	95.27	119.33	78.34	117.79	131.09	106.08	0.2748	1.67e-62
Gulo	1.77	0.52	2.32	7.5	7.74	0.88	1.81067	1.92e-62
Ggh	66.16	117.17	49.72	42.99	55.46	67.77	-0.493135	1.93e-62
1810065E05Rik	29.96	107.3	17.88	19.17	56.97	15.46	-0.772047	2.04e-62
Neurl1a	6.96	5.22	8.31	14.45	11.27	9.44	0.789615	2.49e-62
Sirpa	7.55	8.54	7.4	10.93	19.28	9.3	0.775308	3.54e-62
Vwf	3.96	2.63	1.27	5.87	6.33	1.72	0.830686	5.79e-62
Slpi	134.3	82.35	67.47	46.5	67.15	80.29	-0.556606	9.52e-62
Rnf186	107.23	63.35	40.56	42.11	44.42	59.49	-0.535615	9.79e-62
Nfib	4.96	13.56	16.75	5.65	5.8	13.52	-0.499837	1.06e-61
Vmp1	61.2	88.23	154.39	77.5	66.21	105.31	-0.287166	1.07e-61
Zan	3.56	2.59	0.97	0.97	1.75	1.22	-0.850954	1.36e-61
Tgfbi	32.15	36.77	42.27	55.29	65.56	28.7	0.426901	1.56e-61
Birc5	46.68	76.56	71.76	49.54	33.25	44.75	-0.607303	1.56e-61
Ppbp	14.59	3.91	5.17	2.31	1.2	1.08	-2.3617	2.39e-61
Slc35a1	30.81	56.97	31.38	20.39	27.74	33.04	-0.548521	2.43e-61
Spon1	3.34	4.11	4.21	5.92	9.96	4.62	0.808285	2.7e-61
Anpep	5.56	2.27	2.7	6.87	10.85	4.2	1.07923	3.28e-61
Slc43a2	5.65	4.78	4.92	8.83	8.25	7.41	0.678595	3.55e-61
Cd52	36.74	30.68	37.9	46.4	117.78	37.19	0.926547	3.93e-61
Nop56	49.09	79.15	105.51	63.08	38.62	76.04	-0.393722	5.57e-61
Insig1	42.5	40.71	37.45	26.9	26.24	33.6	-0.478055	5.6e-61
Hnrnpab	217.27	266.51	326.02	254.87	188.47	270.63	-0.181593	6.06e-61
St6galnac6	321.38	316.59	117.32	211.71	257.17	192.34	-0.195002	2.1e-60
S100a10	503.9	557.85	747.12	484.67	412.36	630.1	-0.244204	2.15e-60
Gm41844	47.88	18.5	19.3	46.24	20.54	63.25	0.603162	2.18e-60
Pdlim4	54.08	33.62	71.22	77.79	69.33	81.68	0.526214	2.38e-60
Ncald	16.04	15.75	7.31	21.31	24.23	14.57	0.619916	3.22e-60
Tspan8	233.28	432.6	293.47	181.38	235.58	371.86	-0.255803	4.93e-60
Adgre1	2.79	2.25	0.88	3.8	9.93	2.33	1.42938	5.04e-60
Rarres2	41.78	16.5	21.86	26.87	92.44	30.94	0.901105	6.07e-60
Abca1	2.71	4.53	4.34	4.39	6.26	7.42	0.641736	7.11e-60
Cdx1	205.57	154.14	100.43	119.78	123.77	133.42	-0.29023	1.19e-59
Myo6	22.2	31.58	14.58	23.65	28.96	32.77	0.314993	1.85e-59
Per2	13.62	1.93	5.61	3.03	3.37	5.57	-0.823808	2.82e-59
Mettl7b	28.32	26.68	5.54	8.41	11.47	8.46	-1.10095	2.82e-59
Aspscr1	96.62	95.65	140.1	135.5	141.18	133.01	0.306798	6.77e-59
Trp53inp1	12.41	21.64	24.63	20.44	28.92	28.45	0.404574	7.35e-59
Cks2	49.92	76.09	81.41	42.03	33.45	47.78	-0.750469	9.17e-59
Gapdh	2265.8	1949.46	2464.48	2318.99	1843.16	2073.87	-0.0846043	1.04e-58
Sumo2	158.69	221.79	343.59	174.51	159.13	251.79	-0.307311	1.22e-58
Wdr6	22.02	15.03	16.43	30.11	25.49	18.69	0.475756	1.45e-58
Ranbp1	115.71	157.4	224.81	134.42	83.14	156.78	-0.409267	1.47e-58
Gstp1	506.57	577.57	608.25	498.33	416.16	527.83	-0.230533	2.46e-58
Irf4	0.55	0.26	0.11	0.53	4.26	0.21	2.42447	2.56e-58
Rsl1d1	28.99	69.23	87.62	36.04	33.26	66.71	-0.452052	4.51e-58
Zbtb4	7.48	4.48	5.62	8.95	11.56	7.45	0.64345	6.07e-58
Cybb	1.76	2	1.75	2.81	7.66	2.4	1.21399	6.51e-58
Pdia3	250.71	321.56	430.08	285.38	262.93	353.57	-0.152931	6.86e-58
Rpl36al	257.78	500.85	491.62	270.34	259.61	468.33	-0.32695	7.12e-58
Snrpd1	46.9	80.31	128.24	50.63	36.66	82.18	-0.591752	7.23e-58
Nop58	13.71	46.11	60.99	16.96	15.43	50.47	-0.546868	8.27e-58
Krt84	15.52	3.43	10.54	4.42	7.07	2.85	-1.06604	8.62e-58
B4galnt1	14.68	26.81	14.73	27.78	34.74	22.76	0.60577	1.4e-57
Axl	14.62	8.31	7.6	13	26.44	7.21	0.615371	1.93e-57
Fkbp4	271.64	223.72	275.7	254.12	180.97	238.19	-0.193957	2.1e-57
Nlrp10	1.29	0.98	1.35	2.54	4	3.51	1.46782	2.69e-57
Nudc	81.03	86.79	126.35	80.91	59.82	79.92	-0.413113	2.7e-57
Slc6a9	14.3	14.53	18.14	23.78	26.7	18.49	0.562446	3.06e-57
2010107E04Rik	251.56	383.84	402.65	199.53	216.07	346.67	-0.443226	3.38e-57
Pld3	44.57	32.3	47.09	58.51	58.25	49.74	0.424914	4.55e-57
Colgalt1	51.15	53.09	42.27	78.52	52.91	53.01	0.332659	6.52e-57
Atp6v1b2	53.59	53.46	39.39	63.62	61.17	62.98	0.357286	6.88e-57
Amot	9.21	8.72	10.55	12.84	14.68	12.46	0.506795	7e-57
Uqcrb	161.31	252.87	320.58	139.01	151.98	251.19	-0.44126	7.2e-57
Rtn4	55.63	60.97	65.7	82.9	67.25	68.86	0.276429	9.66e-57
Pou2af1	2.59	1	0.77	2.32	10.9	1.06	1.69501	9.96e-57
Smim6	117.11	91.91	98.32	70.34	58.94	90.68	-0.483432	1.21e-56
Stat2	13.99	10.88	11.14	13.03	27.57	12.26	0.549102	1.38e-56
Cacybp	19.15	32.81	55.29	16.65	18.4	38.08	-0.555475	2.55e-56
Rtp4	16.95	14.37	13.72	16.7	40.69	21.22	0.784624	2.69e-56
Tnc	15.96	16.99	17.13	12.45	14.98	8.76	-0.473382	5.62e-56
Itgb5	28.32	21.37	19.92	33.53	43.21	19.15	0.459432	5.91e-56
Cisd3	141.05	170.7	175.82	121.52	99.92	139.89	-0.432569	6.28e-56
Muc6	0.83	0.57	1.04	3.38	1.57	1.05	1.31248	6.58e-56
Tacc3	24.22	37.12	38.67	24.92	18	23.82	-0.554335	6.77e-56
2900026A02Rik	25.33	19.25	15.35	27.34	30.08	18.46	0.350931	8.81e-56
Atp5e	452.77	453.76	520.43	419.1	333.58	374.03	-0.339675	1.24e-55
Anxa7	84.82	100.45	90.49	118.64	113.72	99.55	0.269292	1.46e-55
Gm42226	4.63	16.26	3.75	3.69	2.85	3.48	-1.30027	1.49e-55
Calcoco1	14.52	11.89	16.44	22.81	26.77	16.01	0.612982	1.84e-55
H3f3b	403.73	471.31	515.43	437.98	346.23	471.23	-0.1468	2e-55
Pfkfb3	6.67	6.2	6.33	11.69	12.2	7.38	0.716011	2.21e-55
Klf3	40.26	39.97	23.58	46.61	48.87	39.51	0.351245	3.86e-55
Tnfrsf19	11.36	8.27	13.21	17.43	18.11	13.47	0.579298	4.02e-55
Rtcb	97.83	94.67	42.88	107.19	93.45	95.18	0.32875	4.18e-55
Igfbp3	26.76	21.99	20.09	43.33	36.94	18.68	0.526029	5.05e-55
Etv5	23.04	30.81	28.76	52.88	39.43	15.56	0.390767	8.99e-55
Mad2l1	19.82	35.68	50.32	22.77	16.87	29.06	-0.623517	1.04e-54
Snrpd2	233.21	273.24	389.84	251.81	175.45	257.81	-0.385679	1.18e-54
Ccnb2	30.51	45.57	53.33	35.78	26.41	23.72	-0.588036	1.42e-54
Anxa8	144.61	144.34	219.86	139.39	115.62	172.06	-0.251966	1.44e-54
Adar	17.4	13.57	12.49	17.04	26.04	15.74	0.431642	1.54e-54
Nav2	11.37	7.92	13.77	15.39	14.94	11.92	0.366168	1.78e-54
Foxp1	14.01	16.69	19.12	10.41	13.47	13.19	-0.421536	2.25e-54
Anp32b	128.57	202.43	198.21	159.48	113.06	159.59	-0.291051	2.29e-54
Eif5	47.16	99	100.38	54.55	59.04	92.7	-0.249695	2.9e-54
Nfix	31.22	20.05	20.83	32.85	36.82	22.31	0.349424	2.93e-54
Olfr613	3.1	10.87	13.95	3.72	4.7	8.84	-0.697732	4.3e-54
Apol9a	6.1	4.43	2.48	6.15	22.73	4.97	1.32481	4.89e-54
Inpp5d	3.9	2.89	2.19	4.95	10.55	2.94	1.04187	5.1e-54
Gda	15.43	23.89	18.18	18.95	23.73	33.23	0.401236	5.51e-54
Gpa33	387.81	296.7	272.79	355.72	362.35	348.11	0.153795	5.52e-54
Xdh	23.61	18.59	12.27	21.83	31.91	20.96	0.481412	7.21e-54
Svep1	2.32	0.99	1.39	1.93	5.68	1.02	0.870626	9.9e-54
Slc16a3	52.14	46.66	72.92	94.89	55.49	65.84	0.345824	2.02e-53
Optn	20.54	16.25	31.47	28.21	30.74	36.39	0.538674	2.61e-53
Slc10a2	0.95	2.08	2.98	1.99	3.14	8.76	1.20399	3.3e-53
Cnnm4	64.58	47.26	22.97	31.24	44.59	33.21	-0.311464	3.83e-53
Gbp9	1.98	1.97	4.26	3.4	7.74	4.74	0.939361	4.28e-53
2021-09-08	27	17.27	16.99	26.65	33.07	21.93	0.414843	4.78e-53
Trim30a	2.46	3.25	1.56	2.57	9.91	3.7	1.14686	6.12e-53
Gpld1	14.42	10.32	12.19	19.76	19.8	15.53	0.560659	9.38e-53
Taf1d	8.65	34.74	38.24	10.51	10.34	24.45	-0.845336	1.73e-52
Bst2	34.82	31.39	24.88	46.79	77.34	27.98	0.734645	2.28e-52
Eif4a2	70.92	129.87	156.63	75.7	101.01	122.2	-0.26296	2.31e-52
Gm2a	15.44	9.65	10.49	15.81	23.91	12.14	0.53872	2.69e-52
2200002D01Rik	213.19	246	194.23	134.12	149.46	199.65	-0.438674	3.35e-52
Pdgfra	6.69	6.88	7.56	9.04	15.88	6.33	0.558264	5.4e-52
Igfbp4	225.68	302.16	333.87	450.55	287.08	226.76	0.167506	7.44e-52
Zmynd15	2.6	1.86	3.85	5.45	11.17	3.8	1.33411	7.44e-52
Cdhr5	264.49	181.27	119.12	172.47	267.03	204.08	0.18919	1.55e-51
Fos	45.35	44.6	78.04	43.69	39.71	42.64	-0.413863	2.36e-51
Evx1	17.16	13.42	21.87	28.79	29.6	16.43	0.569134	2.65e-51
Ptges3	66.85	98.29	139.38	74.61	60.03	110.43	-0.313527	3.08e-51
Tma7	131.96	227.39	293.34	153.56	126.62	218.83	-0.387553	3.22e-51
Trf	63.37	130.57	43.51	165.83	59.46	63.59	0.291894	3.27e-51
Fam43a	11.6	7.53	9.89	18.14	17.01	11.26	0.678278	4.46e-51
Itgb4	86.1	75.07	77.09	81.86	63.81	62.12	-0.195963	5.19e-51
Srsf7	58.22	75.98	105.8	60.03	53.36	76.78	-0.3104	6.44e-51
Sorcs2	15.84	14.15	12.4	25.79	16.33	14.73	0.427255	7.31e-51
Rps21	846.95	1093.37	833.13	857.55	718.64	778.95	-0.235532	7.93e-51
Snrpg	142.88	261.24	313.47	167.26	130.05	214.93	-0.485905	8.39e-51
Ptgfrn	56.13	45.04	37.21	65.22	56.22	42.12	0.242867	1.18e-50
Pld4	4.49	2.54	4.02	6.36	14.73	5.13	1.24755	1.25e-50
Spc24	19.69	29.88	41.5	17.63	12.09	24.57	-0.743862	1.45e-50
Heg1	7.51	5.91	6.61	11.36	9.21	8.15	0.521423	1.57e-50
Apol7c	5	2.29	0.97	2.36	15.97	3.37	1.37448	2.06e-50
Pcdhgc3	21.32	13.09	10.25	27.56	17.89	15.65	0.455811	2.3e-50
Psg16	10.63	21.83	28.19	14.24	12.75	16.69	-0.473473	2.52e-50
Hvcn1	3.86	2.02	2.47	4.49	12.3	2.72	1.23541	2.65e-50
Mrfap1	139.69	188.38	228.05	151.52	134.34	182.31	-0.248697	4.38e-50
Cyp2c55	23.13	19.33	1.57	3.33	12.85	7.68	-0.894253	7.93e-50
Strap	48.27	78.12	96.77	53.21	45.63	81.38	-0.309209	8.87e-50
Racgap1	22.51	27.54	29.48	22.12	15.22	18.15	-0.509687	9.62e-50
Slc25a3	555.2	543.14	515.67	483.37	437.95	515.8	-0.150584	1.24e-49
Prex1	6.28	5.82	4.65	9.35	9.99	6.22	0.608835	1.29e-49
BC005537	51.71	49.06	35.52	58.33	69.71	46.95	0.357956	1.47e-49
Tmem86a	5.33	5.54	7.34	11.93	16.06	9.55	1.04136	1.7e-49
Polr2a	31.64	28.88	29.89	42.25	35.65	31.23	0.272587	2.66e-49
Gpr55	1.42	1.1	0.67	2.85	6.06	2.34	1.83222	3.81e-49
Cbx3	54.26	107.8	142.58	70.73	65.09	112.29	-0.318484	5.67e-49
Cbr2	60.17	27.35	26.04	25.24	57.94	90.45	0.598277	6.65e-49
Atp10a	10.43	3.48	9.95	8.49	17.05	9.61	0.562714	7.22e-49
Tra2b	69.47	97.35	106.41	60.11	66.62	94.76	-0.306977	7.28e-49
Fetub	2.49	2.61	3.26	11.73	3.39	8.32	1.54534	9.03e-49
Ccnb1	17.48	25.36	27.72	17.05	12.97	16.09	-0.612467	1.25e-48
Trpv6	14.69	8.52	12.37	13.56	12.61	28.5	0.616554	1.42e-48
Kif11	6.05	13.41	13.36	5.65	5.6	10.18	-0.617669	1.74e-48
Tmbim6	456.94	386.19	270.15	427.67	447.48	346.85	0.13271	1.84e-48
Tagln2	382.9	311.87	384.79	377.31	255.95	312.1	-0.188986	1.86e-48
Cyth4	5.85	5.28	6.09	9.03	14.1	8.44	0.869673	2.32e-48
Csf2rb	4.57	5.91	4.17	7.89	12.95	4.3	0.807795	2.61e-48
C77080	103.2	59.84	46.62	85.52	90.81	65.56	0.207509	3.47e-48
Ypel3	32.82	32.76	40.1	43.87	83.9	34.07	0.628915	5.18e-48
Neu1	27.24	20.31	21.29	28.59	35.79	26.6	0.399483	5.49e-48
Prrc2a	105.75	71.55	73.49	107.37	99.96	73.31	0.16317	6.11e-48
Car2	173.97	158.08	111.64	117.42	131.41	120.43	-0.265891	7.67e-48
Set	92.86	134.34	162.56	110.52	84.17	139.11	-0.219323	8.18e-48
Acox1	54.78	45.76	32.26	48.6	60.95	54.05	0.289958	9.61e-48
Asprv1	14.09	16.37	40.91	34.4	45.09	28.71	0.599314	1.43e-47
Thoc2	3.17	9.5	13.4	3.36	4.75	9.92	-0.537145	2.31e-47
Irf9	31.31	30.9	32.02	36.71	58.31	31.69	0.428998	2.63e-47
Mtss1l	4.46	1.62	2.74	3.85	10.31	2.39	0.907841	2.85e-47
Naa15	5.4	16.89	22.15	6.87	7.58	18.07	-0.453879	3.36e-47
Ssr1	39.91	46.05	48.14	33.59	29.4	47.06	-0.271769	3.9e-47
Sqle	56.41	38.82	42.64	34.71	27.13	44.18	-0.379405	4.42e-47
Fam84a	13.2	9.06	9.99	18.26	18.59	11.87	0.59451	4.83e-47
Mat2a	95.39	117.35	105.19	120.68	103.63	146.88	0.222674	4.93e-47
Pa2g4	85.36	102.67	128.14	97.26	64.89	101.35	-0.260921	5.45e-47
Nme1	110.94	120.11	144.96	113.59	69.62	112.71	-0.342967	5.94e-47
Isx	5.98	5.17	5.08	9.49	9.5	15.12	1.06714	6.87e-47
Bzw2	75	92.55	94.65	82.22	69.43	144.87	0.282052	7.4e-47
Serinc5	16.78	16.64	11.94	20.18	24.99	15.2	0.409262	7.93e-47
Slc25a5	703.84	594.32	529.98	530.12	520.97	604.29	-0.144982	9.7e-47
Odc1	79.38	101.94	70.68	82.53	54.36	69.56	-0.285535	1.2e-46
Retnlb	86.84	91.82	35.63	17.19	98.36	24.41	-0.630652	1.26e-46
Pex5l	1.35	1.05	0.93	2.16	5.34	2.6	1.60052	1.35e-46
Wdfy4	0.69	0.35	0.19	0.68	2.46	0.35	1.50113	1.44e-46
Cmah	9.82	16	11.22	8.64	7.27	12.25	-0.395403	1.72e-46
Plac9a	111.27	70.62	45.36	34.55	65.99	33.15	-0.772736	2.12e-46
Tyrobp	25.32	23.79	23.44	43.6	61.75	32.27	0.920054	2.45e-46
Rac2	7.44	5.3	5.21	8.37	17.4	5.79	0.807248	2.5e-46
Mrpl51	47.2	58.49	69.85	40.83	35.82	51.27	-0.457003	3.61e-46
2810417H13Rik	22.26	40.25	45.5	22.85	16.17	39.41	-0.462238	4.09e-46
Gm21596	106.46	191.76	253.59	129.64	106.27	196.62	-0.351703	4.36e-46
Capn5	57.49	38.71	40.03	56.03	57.32	50.48	0.266662	4.76e-46
Hs3st3b1	3.46	2.56	3.09	6.34	6.53	3	0.801567	5.13e-46
Nbl1	45.38	30.51	32.95	44.86	69.41	35.43	0.457796	5.24e-46
Krt7	354.35	302.38	575.59	442.22	250.8	407.72	-0.158859	5.38e-46
Ube2h	35.31	36.51	39.84	47.32	48.12	40.59	0.292761	6.51e-46
Cd68	10.02	8.99	10.76	18.97	23.74	14.95	0.95171	6.57e-46
Rps19	807.64	925.67	892.8	819.05	698.11	767.31	-0.175612	6.92e-46
Rnf44	74.84	54.24	47.55	77.71	75.62	56.32	0.251783	8.03e-46
Sptbn2	6.11	3.93	7.67	10.29	8.71	6.28	0.520195	9.09e-46
Rnaset2a	160.77	153.57	101.4	176.24	191.93	153.76	0.326096	9.2e-46
Atp5j	217.87	342.11	458.22	210.31	199.21	349.7	-0.31161	1.01e-45
Mark1	4.3	0.97	4.56	5.28	7.47	5.66	0.899803	1.01e-45
Larp7	7.71	24.66	34.63	11.06	8.77	23.26	-0.637655	1.01e-45
Mknk2	120.69	91.15	85.3	125.13	122.63	94.08	0.20899	1.21e-45
Serpina3g	6.83	7.86	4.19	10.26	20.22	5.84	0.936405	1.24e-45
Gusb	48.72	70.01	48.31	83.63	57.44	61.21	0.330591	1.7e-45
Slc39a8	16.16	6.57	21.76	13.34	20.96	29.99	0.530779	1.82e-45
Glb1	37.83	39.9	27.79	52.11	46.18	40.84	0.39878	2e-45
Ces1g	3.74	2.96	2.7	5.63	5.54	10.34	1.1921	2.07e-45
Ivns1abp	98.45	154.79	112.35	88.82	91.03	139.45	-0.191682	2.29e-45
Larp1	44.09	56.32	58.52	44.4	38.33	53.36	-0.22121	2.39e-45
Spink1	221.36	122.16	282.77	208.82	192.23	429.05	0.404354	2.48e-45
Gm10045	362.42	703.11	518.11	351.93	402.24	566.79	-0.26521	2.52e-45
Srsf3	80.88	114.39	143.34	87.74	76.28	123.06	-0.238812	3.04e-45
Lgr6	4.86	4.99	8.2	11.1	4.98	10.54	0.564319	3.45e-45
Tpx2	15.67	25.31	27.34	16.69	12.93	19.03	-0.481277	3.57e-45
Tenm4	9.3	7.45	11.55	13.52	12.57	10.13	0.353583	4.02e-45
Vgll4	57.52	38.23	39.93	68.9	64.99	43.53	0.361837	4.41e-45
Mvp	158.73	129.49	134.96	152.38	189.58	141.26	0.190078	4.72e-45
Itpripl2	5.57	3.55	3.05	4.79	8.86	5.62	0.656021	4.72e-45
Ube2n	72.07	104.43	147.62	76.61	71.05	111.06	-0.298591	4.77e-45
Slfn2	14.49	10.74	10.52	17.84	32.81	10.41	0.765943	4.9e-45
Dnajb1	45.7	26.51	38.71	24.91	30.24	29.35	-0.395598	4.97e-45
Hs6st1	63.89	45.76	50.7	72.77	59.08	60.47	0.263255	5.84e-45
Chd3	19.17	16.78	21.57	22.83	23.98	24.55	0.311535	5.88e-45
Gbp4	1.2	0.98	1.63	1.45	5.74	2.55	1.34163	7.87e-45
Col1a1	61.24	91.43	118.73	90.39	97.05	53.37	-0.172278	8.32e-45
Ndufa4	287.64	389.79	518.14	310.44	248.09	410.94	-0.302306	9.1e-45
Pnisr	8.93	26.91	36.37	10.96	17.37	26.24	-0.421513	9.51e-45
Numa1	30.34	25.39	21.3	34.91	34.43	23.69	0.275209	1.02e-44
Upf3b	4.99	20.58	30.2	5.01	7.88	22.56	-0.654209	1.05e-44
Ihh	43.12	40.89	25.49	49.82	53.73	39.24	0.391343	1.11e-44
Lyar	15.45	29.25	41.71	14.25	11.71	28.56	-0.652619	1.22e-44
Nccrp1	13.53	2.42	1.7	1.78	1.74	1.68	-1.76436	1.44e-44
Cdv3	30.58	50.66	58.57	31.31	29.56	47.57	-0.321237	1.44e-44
Tap2	26.36	12.43	12.23	19.19	36.25	19.25	0.542853	1.61e-44
Cox5b	415.49	364.38	363.88	329.56	291.09	321.59	-0.279893	1.65e-44
Ankrd12	1.1	4.38	8.24	1.01	2.02	5.22	-0.665468	1.77e-44
Vdac2	231.37	240.81	247.91	198.52	179.87	248.22	-0.20173	2.08e-44
H2-T22	38.65	32.66	27	34.29	65.12	37.7	0.479357	2.14e-44
Dync1h1	36.81	26.05	23.51	33.5	36.98	27.71	0.183034	2.7e-44
Eif1	430.74	451.11	548.32	429.97	411.13	437.33	-0.162301	3.03e-44
Col7a1	1.34	1.71	2.34	0.85	0.42	1.15	-1.15324	4.43e-44
Cycs	68.54	91.7	110.71	64.69	60.08	104.61	-0.24195	4.58e-44
Phgr1	260.74	260.99	174.11	126.53	141.74	269.05	-0.377767	5.79e-44
Plat	27.21	47.68	41.69	76.49	46.28	26.42	0.36229	6.02e-44
Pycr1	18.78	9.76	29.27	35.1	28.94	20.27	0.579698	7.39e-44
Gcnt2	7.4	8.16	10.8	13.05	13.86	12.08	0.576283	7.62e-44
Arhgdib	15.59	11.78	6.35	18.38	35.31	9.5	0.914178	8.33e-44
Atp12a	54.78	16.64	20.04	23.54	66.37	25.92	0.330111	8.33e-44
Robo1	5.01	3.63	8.1	8.4	8.33	7.49	0.536429	9.15e-44
Man2b1	60.49	43.14	40.96	56.39	71.26	50.76	0.293975	1.04e-43
Itgb7	2.63	1.76	1.8	3.38	10.24	1.73	1.30038	1.09e-43
Cdca8	31.39	39.9	44.37	31.99	20.62	27.06	-0.534759	1.15e-43
Tmed5	5	14.32	20.31	5.45	6.29	13.47	-0.615372	1.27e-43
Dtx3	9.03	11.13	12.95	16.49	24.4	12.53	0.690077	1.36e-43
Ido1	2.64	2.29	1.51	2.5	6.88	10.57	1.61625	1.5e-43
Slc20a1	25.41	25.35	20.25	16.23	16.73	19.23	-0.454594	1.71e-43
Ifih1	5.15	9.71	6.9	5.43	14.31	13.11	0.634907	1.8e-43
Nhsl1	26.51	25.21	32.64	40.29	32.46	28.32	0.262839	1.8e-43
Tppp	7.7	2.3	1.64	1.77	2.81	1.17	-1.02682	1.91e-43
Man2b2	21.89	19.35	15.82	27.54	28.85	19.44	0.497902	2.44e-43
Nudt4	77.77	91.97	90.86	53.92	75.44	92.53	-0.237245	2.96e-43
Cx3cr1	2.18	1.99	2.86	4.18	7.59	3.04	1.06897	3.04e-43
Marcksl1	248.54	310.43	471.66	457.81	268.14	421.41	0.15859	3.94e-43
Cpxm2	4.46	3.61	2.39	8.6	8.77	4.17	1.01844	4.11e-43
Zfp36l1	47.82	48.79	59.64	63.55	67.23	60.5	0.290769	4.45e-43
Krt15	16.31	3.96	6.46	2.7	2.53	6.4	-1.20501	4.45e-43
Trafd1	29.4	20.45	19.06	26.74	44.54	24.21	0.464138	4.75e-43
Vav1	5.47	2.92	3.41	6.63	7.47	6.65	0.81812	4.89e-43
Nusap1	7.75	19.69	22.29	7.36	9.46	13.91	-0.658035	5.56e-43
Bcl9	10.64	9.22	11.16	15.82	15.04	11.23	0.445174	6.31e-43
Prom1	45.95	124.9	69.33	91.22	95.65	96.74	0.222335	6.54e-43
Rab43	28.7	21.52	20.17	32.87	33.92	22.86	0.349128	6.98e-43
Plxnb2	88.75	57.02	52.21	78.09	84.63	61.83	0.179248	7.61e-43
Mfsd4a	110.91	126.54	100.4	129.98	111.15	141.03	0.178727	8.5e-43
Pycard	55.43	48.33	30.26	32.58	31.1	36.7	-0.419144	8.71e-43
Noct	16.36	13.04	28.14	10.44	10.93	15.87	-0.631781	9.38e-43
Hsd3b3	11.43	11.42	1.85	2.34	5.66	2.1	-1.26961	1.07e-42
Esf1	2.3	11.03	15.98	2.93	3.44	10.83	-0.762424	1.15e-42
Dbn1	19.64	9.69	21.94	29.69	20.25	22.03	0.493984	1.22e-42
Cerk	15.96	10.7	12	17.65	21.36	14.83	0.481124	1.33e-42
2010109I03Rik	44.54	79.02	57.59	55.44	51.28	32.4	-0.380002	1.77e-42
Slfn5	1.52	2.73	2.29	1.99	7.3	2.94	0.893902	1.95e-42
Egln3	50.15	51.24	53.14	65.07	65.42	60.49	0.30467	2.15e-42
Ldb1	74.92	69.78	101.1	102.64	103.36	86.82	0.279298	2.31e-42
Ero1l	15.23	20.03	15.81	17.31	23.53	26.95	0.404019	3.13e-42
Utp11l	27.46	42.27	50.81	20.62	22.43	37.45	-0.656056	3.88e-42
Ppt1	19.59	22.22	19.13	27.64	32.94	24.98	0.487145	4.13e-42
Plin2	59.38	74.73	52.36	78.23	91.52	65.26	0.337132	4.79e-42
Actg1	1672.64	1700.42	1572.49	1920.73	1384.32	1406.42	-0.0677426	6.08e-42
Trim40	20.36	31.19	25.19	28.23	38.41	42.99	0.488644	6.41e-42
Eml1	17.8	13.7	13.89	22.45	21	18.6	0.455076	7.06e-42
Cyp2s1	28.85	13.41	5.02	8.4	12.23	9.53	-0.65452	7.83e-42
Scarb2	22.05	27.78	19.54	30.44	31.7	25.61	0.337749	8.08e-42
Limd2	26.79	20.38	33.69	43.87	41.66	32.05	0.538394	9.81e-42
Nlrc5	1.56	1.13	1.07	1.43	5.1	1.24	1.04445	1.35e-41
Hnrnpu	88.26	128.77	170.37	101.61	94.88	150.01	-0.168298	1.39e-41
Capg	147.64	187.51	204.06	212.47	189.67	229.41	0.24227	1.78e-41
Cox7a2	149.16	201.14	193.72	121.84	125.69	181.32	-0.345597	2e-41
Pirb	2.89	2.55	2.92	5.01	8.81	3.23	1.18066	2.29e-41
Padi4	11.57	16.03	16.39	22.47	17.81	24.11	0.550777	2.39e-41
Ppp3ca	10.35	21.65	26.71	9.04	13.5	19.47	-0.427534	2.61e-41
Tubb4a	20.67	11.24	29.53	31.5	28.27	27.34	0.504589	3.22e-41
Itga9	3.05	1.85	2.02	3.5	6.89	1.95	0.865276	3.67e-41
Mphosph8	3.1	12.24	18.49	3.87	4.39	12.18	-0.731718	3.86e-41
Tbc1d16	4.74	2.88	2.97	5.99	6.7	4.14	0.664479	4.23e-41
Calml3	6.5	0	0.04	0.08	0.04	0	-5.80235	4.35e-41
Chmp4b	223.02	195.35	183.96	267.03	225.86	199.06	0.200939	4.77e-41
Calm2	275.14	453.53	520.96	286.5	314.47	490.91	-0.178209	5.35e-41
Hmgcr	52.09	39.85	37.47	36.88	28.09	41.55	-0.280831	5.45e-41
Extl1	6.12	7.09	7.06	11.22	13.39	10.13	0.770205	5.45e-41
Gaa	21.9	18.85	9.16	26.92	24.2	17.06	0.448635	6.34e-41
Rpl37	232.02	390.08	375.09	268.31	230.58	351.18	-0.23103	6.89e-41
Atl3	14.48	13.34	11.04	16.98	17.88	15.75	0.380189	7.29e-41
Aff4	11.63	15.36	13.42	14.54	17.49	17.84	0.304396	7.49e-41
Mep1b	12.09	20.4	7.25	11.05	26.04	23.87	0.60747	7.67e-41
Grk4	5.03	17.2	19.78	5.33	7.73	14.59	-0.613432	9.6e-41
Capns1	343.48	324.65	464.71	334.05	311.08	354.48	-0.169508	1.21e-40
Tubb2b	28.11	22.16	33.32	46.43	26.53	42.38	0.467782	1.21e-40
Dbi	187.52	381.81	321.7	240.5	214.41	267.61	-0.30293	1.27e-40
Dgat2	41.95	53.84	50.99	66.11	58.92	59.86	0.333167	1.37e-40
Oplah	9.33	5.83	4.9	10.89	11.38	9.02	0.640323	1.63e-40
Gna12	16.83	8.86	5.73	17.82	22.21	12.38	0.735011	1.7e-40
LOC641025	4.65	0.34	0	3.42	18.03	1.76	2.19981	1.81e-40
Tomm7	48.44	84.57	95.16	55.41	45.5	67.92	-0.43439	1.96e-40
Dock2	1.04	0.97	0.69	1.22	4.53	0.94	1.31291	2.12e-40
Tnnt2	11.84	9.41	10.34	4.28	3.45	4.87	-1.32453	2.16e-40
Tmem184b	29.39	24.18	26.4	34.58	40.35	27.26	0.379402	2.78e-40
Fcer1g	18.84	19.16	30.7	30.8	56.24	35.05	0.824069	3.22e-40
Pde2a	24.6	20.83	6.12	9.91	17.61	9.61	-0.477275	3.77e-40
Phgdh	34.09	45.9	58.07	42.17	26.27	33.92	-0.428015	4.28e-40
Exoc4	12.04	9.33	11.58	17.19	16.28	13.93	0.527836	4.33e-40
Emid1	3.74	2.62	2.67	5.38	12.33	2.93	1.26903	4.37e-40
Atg9b	8.7	30.26	29.56	15.74	13.48	22.1	-0.417618	4.58e-40
Clmn	17.56	16.59	9.07	17.4	21.19	13.53	0.266396	4.91e-40
Pik3cd	2.71	1.8	1.76	3.19	7.1	1.73	1.02163	5.25e-40
Midn	77.32	58.08	60.15	92.89	77.71	58.16	0.22828	5.99e-40
Spint1	119.29	90.55	100.75	126.27	129	108.89	0.229675	6.28e-40
Dkc1	6.58	21.91	21.38	7.43	7.58	18.19	-0.594192	7.19e-40
Tgfa	14.61	11.83	12.19	19.77	18.92	13.8	0.442182	7.79e-40
Gtf3c1	22.49	16.11	15.92	26.92	23.81	16.78	0.308929	7.85e-40
Nap1l1	65.68	122.07	128.75	85.66	84.81	101.17	-0.245835	8.14e-40
Rnf114	57.19	48.73	50.03	64.94	72.09	55.88	0.304269	8.57e-40
Parp12	26.85	19.59	11.84	21.97	39.91	16.61	0.422809	8.76e-40
Igsf23	28.89	51.12	34.17	60.9	48.95	45.29	0.44719	9.05e-40
Atp13a2	18.81	12.56	13.88	22.09	24.79	14.65	0.423352	9.54e-40
Zdhhc9	26.86	24.5	24.22	36.19	31.95	31.08	0.393095	9.63e-40
Gvin1	7.02	19.02	12.12	5.03	13.83	10.8	-0.372538	1.01e-39
Sp5	26.35	19.59	31.07	42.81	25.18	37.77	0.461218	1.02e-39
Abhd4	37.07	39.89	41.62	51.94	55.55	44.27	0.351138	1.35e-39
Akap13	21.2	17.87	14.07	22.04	25.93	15.58	0.267496	2.08e-39
H2-Q8	2.04	0	0	0	14.03	0	2.75672	2.27e-39
Sh3bgrl2	46.12	57.16	39.19	60.93	54.17	56.62	0.268852	2.58e-39
Cdkn1c	15.95	12.36	26.98	29.69	32.32	19.27	0.553715	3.25e-39
Adam19	3.83	4.1	3.41	5.81	9.55	2.66	0.702586	3.41e-39
Uba7	15.89	12.63	12.14	15.26	24.54	18.21	0.507019	4.23e-39
Serinc3	134.76	160.32	106.04	136.27	200.76	124.78	0.184509	4.63e-39
Gfpt1	72.24	78.35	24.07	37.63	59.54	56.05	-0.195791	4.71e-39
Tpm4	108.23	160.77	234.84	149.77	131.27	157.04	-0.201173	5e-39
Ifi47	14.13	12.23	14.36	12.11	29.36	23.47	0.666353	5.21e-39
Rps10	1086.66	1090.88	1015.71	1066.69	872.42	926.1	-0.154004	5.32e-39
Xaf1	7.32	6.8	6.75	9.78	22.67	10.48	0.959049	5.63e-39
Sft2d2	46.03	42.48	30.96	53.52	49.09	37.87	0.233572	5.75e-39
St14	191.91	162.61	170.1	216.55	206.41	159.05	0.150429	6.31e-39
Arhgef2	30.41	29.62	46.38	49.54	42.45	37.45	0.259592	6.75e-39
Dennd4c	13.76	17.09	18.91	15.18	23.66	22.67	0.360397	6.81e-39
Lrrc19	7.45	12.87	9.32	8.84	14.02	22.79	0.619885	6.96e-39
Dnase1l3	2.81	1.09	1.6	2.27	8.21	1.72	1.13524	7.81e-39
Lrrc59	111.5	108.22	88.86	97.75	69.89	97.05	-0.220461	1.04e-38
Tcf4	10.76	23.2	53.29	13.45	24.14	31.23	-0.278914	1.17e-38
Slfn4	22.79	61.15	73.03	30.48	87.03	66.27	0.260454	1.21e-38
Arf3	84.5	73.44	65.37	89.14	93.1	77.29	0.215395	1.22e-38
Ptms	626.3	544.84	804.16	673.11	553.24	570.7	-0.135023	1.32e-38
Kcnq1	44.91	33.66	34.5	50.52	39.81	50.65	0.326054	1.39e-38
Hbp1	20.77	32.24	25.28	33.87	40.35	30.08	0.38774	1.39e-38
Tmem37	29.72	24.68	36.77	47.89	41.93	47.56	0.591807	1.39e-38
Hsd11b2	157.67	54.11	41.2	57.08	50.28	98.2	-0.302818	1.42e-38
Vwa5a	16.45	13.32	12.05	18.27	20.88	17.56	0.439507	1.44e-38
Psrc1	4.07	13.75	12.28	6.03	5.29	3.34	-1.03497	1.69e-38
Cotl1	70.52	58.63	38.7	79.55	84.33	50.9	0.354421	1.85e-38
Bcl9l	14.19	8.48	10.66	16.97	16.6	10.19	0.388767	1.95e-38
Ndufb8	258.09	238.72	215.97	191.42	174.53	207.16	-0.307704	2.46e-38
F3	39.88	51.4	131.06	89.58	25.84	61.02	-0.323265	2.5e-38
Ckap2	4.89	11.52	10.33	5.21	4.59	4.87	-0.866784	2.51e-38
Cd79a	7.93	2.2	0.45	2.81	22.74	1.36	1.32644	2.85e-38
Esr1	2.37	2.27	3.51	3.6	4.53	5.46	0.787524	2.86e-38
Klf6	43.25	50.76	51.05	37.62	38.33	45.14	-0.262213	3.03e-38
Sh3pxd2b	14.88	11.64	13.12	22.25	14.72	13.05	0.339786	3.11e-38
Phb2	221.2	234.47	219.85	221.97	153.78	206.11	-0.213683	4.3e-38
Plcg1	11.06	11.05	10.13	18.24	13.24	13.29	0.476068	4.43e-38
Slc18a1	8.05	7.37	12.23	15.45	12.9	13.56	0.600787	4.49e-38
Snrpd3	96.05	145.89	216.45	105.73	87.83	151.51	-0.409782	4.76e-38
Slc6a6	29.03	23.59	19.54	34.65	29.7	23.06	0.284664	4.79e-38
Cadps	1.82	2.39	1.86	3.57	5.84	2.34	0.943443	5e-38
Steap4	15.06	29.54	24.05	34.86	27.72	27.51	0.393687	5.05e-38
Cltc	43.53	58.34	41.8	47.68	54.23	63.62	0.199662	5.1e-38
Gimap3	2.54	2.51	1.41	2.79	11.73	1.82	1.32321	5.93e-38
Gm13304	0	0.04	0	0.01	11.58	0	8.04906	6.82e-38
Gm10591	0	0.04	0	0.01	11.58	0	8.04906	6.82e-38
Ceacam10	85.22	84.47	93.45	93.4	134.27	102.36	0.368094	7.05e-38
Cbx6	18.38	9.61	19.55	22.74	21.83	16.39	0.359605	7.38e-38
Ociad2	23.92	25.11	13.01	13.19	16.13	13.33	-0.544074	8.08e-38
Fam174b	30.36	25.02	18.45	15.5	19.37	18.32	-0.476902	8.5e-38
Ncor2	23.38	14.77	16.13	26.76	22.69	15.82	0.284437	8.73e-38
Lcp2	1.22	1.47	1.21	3.29	5.09	1.6	1.34912	8.92e-38
Ppid	20.09	35.29	55.38	24.89	21.54	32.13	-0.482811	1.04e-37
Erlin2	34.58	30.21	23.26	41.53	35.36	32.63	0.311554	1.1e-37
Vim	156.62	151.35	242.46	261.68	215.14	149.14	0.18843	1.11e-37
Rock1	3.58	11.34	16.32	3.89	5.88	12.67	-0.483777	1.12e-37
Il2rg	7.78	6.62	6.39	11.92	20.82	6.52	0.903581	1.15e-37
Lhpp	24.49	13.03	20.56	33.23	29.66	22.86	0.595828	1.3e-37
Bzw1	67.48	112.22	115.06	75.01	70.78	111.3	-0.210347	1.46e-37
Cers6	16.77	22.6	20.05	24	25.61	22.75	0.2794	1.47e-37
Cyp51	47.11	47.72	50.94	41.12	31.23	49.83	-0.254504	1.64e-37
Ctdsp2	81.78	72.12	53.72	79.57	96.9	59.51	0.195002	1.88e-37
Slc25a4	67.59	77.22	150.46	72.82	77.58	79.81	-0.359677	1.92e-37
Tanc2	1.5	2	2.22	3.89	2.48	2.68	0.660399	2.05e-37
Hdac5	17.28	10.73	12.01	18.68	23.97	12.4	0.452662	2.14e-37
Sdc3	7.81	3.12	2.71	6.22	12.28	3.34	0.671428	3.43e-37
Pea15a	45.89	37.17	52.16	63.79	60.14	44.31	0.316165	5.17e-37
Sumo1	59.18	109.75	145.34	67.05	68.53	114.46	-0.331864	5.25e-37
Spn	1.01	0.56	0.42	1.78	4.04	0.67	1.66538	5.35e-37
Ptgr1	39.03	71.88	77.21	53.59	50.61	34.94	-0.424493	5.82e-37
Slc17a9	23.74	34.45	17.53	17.86	18.93	16.16	-0.529709	5.96e-37
Extl3	15.75	11.5	11.46	18.94	19.67	11.74	0.376576	6.53e-37
Arhgef19	13.65	8.98	12.75	17.9	17.53	14.9	0.498761	6.56e-37
Myo1f	1.84	1.94	1.85	3.51	6.38	2.1	1.08588	6.72e-37
Spns2	17.94	22.86	28.18	37.48	19.96	30.8	0.391315	7.77e-37
Fmnl1	3.33	2.78	2.97	5.48	8.73	2.43	0.888618	7.78e-37
Alox12	36.49	39.29	53.1	45.23	15.05	36.03	-0.371648	7.88e-37
Irf5	4.31	2.55	3.41	6.68	11.39	3.79	1.07995	8.09e-37
Ptprc	1.96	2.94	2.14	2.49	8.18	2.35	0.886656	9.17e-37
1810037I17Rik	70.21	90.97	101.26	57.12	56.62	84.06	-0.409926	9.92e-37
H2-Q7	6.93	8.07	4.43	4.31	27.64	6.89	1.01255	1.06e-36
Focad	8.79	7.08	8.16	11.53	10.76	11.48	0.479904	1.14e-36
Hoxd11	14.31	0.17	13.11	0.07	0.72	16.9	-0.649634	1.19e-36
Atp10b	40	40.53	40.93	42.17	49.13	48.79	0.203299	1.22e-36
Apobr	1.28	1.26	2.37	3.43	3.69	3.84	1.20324	1.34e-36
Zap70	4.88	3.71	5.9	10.35	10.58	4.86	0.998001	1.42e-36
Car1	130.56	237.63	95	115.62	239.29	199.27	0.250215	1.51e-36
Il17rd	3.12	2.3	2.27	4.88	4.52	2.92	0.683293	1.56e-36
Esyt3	1.61	1.55	2.09	4.6	4.06	2.61	1.11029	1.59e-36
Tifa	25.26	38.8	25.32	41.75	30.17	43.3	0.392607	1.76e-36
Dnmt3a	7.63	4.64	6.02	8.51	10	6.02	0.432067	1.83e-36
Mapk4	2.5	1.24	4.35	5.39	4.55	4.43	0.887508	1.9e-36
Cmpk1	128.3	176.82	117	99.06	111.15	152.07	-0.224225	1.9e-36
Fbln5	4.16	5.76	5.69	10.15	12.13	5.8	0.84018	1.91e-36
Rps29	743.57	886.94	857.15	781.38	701.03	691.81	-0.194196	2.03e-36
Hexa	79.94	81.09	52.52	91.19	93.59	73.12	0.297561	2.08e-36
Rbm39	36.57	89.15	99.57	40.64	59.97	95.79	-0.244813	2.19e-36
Gdf11	8.58	3.28	3.63	12.15	11.62	6.54	0.967934	2.8e-36
Mmp28	6.91	6.34	3.63	10.31	10.62	6.32	0.69586	2.86e-36
LOC108167725	0.38	0	0	0.14	4.3	0.02	3.52796	2.96e-36
Hypk	85.32	157.9	211.42	112.69	82.3	150.64	-0.394688	2.96e-36
Tcn2	40.85	32.42	27.84	48.71	50.49	34.23	0.402368	3.09e-36
Ptp4a2	92.77	139.02	145.01	92.35	112.23	129.4	-0.172959	3.12e-36
Gbp6	1.92	2.65	3.29	2.7	8.15	3.81	0.888984	3.31e-36
Nckap1l	2.88	2.05	2.23	3.33	7.78	2.21	0.88825	3.34e-36
Prpf38b	19.79	46.27	60.07	25.14	26.63	44.08	-0.328413	3.62e-36
Psmd1	33.57	56.29	71.73	39.44	34.77	59.35	-0.275707	3.64e-36
Lgr5	11.02	18.24	23.74	24.23	19.19	24.44	0.357984	3.67e-36
Rrm1	28.35	29.86	37.48	27.63	16.12	32.5	-0.325678	3.85e-36
Msi1	3.37	6.12	5.68	12.24	9.6	4.48	0.780226	4.05e-36
Mxra8	12.6	11.52	7.42	14.74	26.98	8.3	0.692567	4.54e-36
Tpsb2	5.69	3.05	2.06	7.34	18.87	2.19	1.39309	5.6e-36
Pcdhga5	0.22	0.24	0.67	0.57	1.63	2.06	1.90383	5.6e-36
Spint2	1038.4	860.09	959.43	925.84	868.08	872.46	-0.100315	7.15e-36
Csf2rb2	2.77	2.93	1.82	4	8.01	2.02	0.872942	8.23e-36
Plekhg5	9.7	7.93	9.47	13.81	12.95	12.44	0.534736	8.71e-36
Kif20b	1.63	5.42	7.93	1.5	2.1	4.83	-0.834978	8.84e-36
Shfm1	119.58	210.92	276.08	154.51	131.07	179.19	-0.383785	8.84e-36
Cxcl2	8.52	5.16	22.93	24.3	17.28	23.5	0.834037	9.09e-36
Cdk2ap2	145.57	112.61	148.43	102.54	105.5	115.37	-0.326424	9.22e-36
Fbxl20	4.81	6.29	6.66	8.89	9.31	5.95	0.450153	9.26e-36
Stard4	24.61	27.41	19.51	16.99	16.95	23.51	-0.337885	1.06e-35
Rpl34	772.86	964.57	957.62	810.88	714.58	872.68	-0.173551	1.1e-35
C330027C09Rik	3.44	10.66	14.62	4.06	3.71	8.76	-0.734913	1.15e-35
Sppl2a	31.06	56.23	34	43.46	56.9	48.71	0.22802	1.19e-35
Knstrn	12.32	19.1	18.54	12.68	9.49	10.46	-0.592294	1.24e-35
Tgtp1	1.65	1.45	1.37	3.34	5.47	2.53	1.33848	1.42e-35
Ikzf1	1.12	0.77	0.57	1.42	4.21	1.1	1.4209	1.56e-35
Cdhr2	82.54	60.8	31.15	53.36	91	58.96	0.213912	1.66e-35
Nucks1	19.79	30.45	31.8	24.94	19.52	23.09	-0.279154	2.02e-35
Grb7	71.76	76.75	91.04	106.82	99.68	77.18	0.253081	2.4e-35
Ahcy	77.2	92.72	95.45	73.6	62.95	88.45	-0.238531	2.41e-35
Cgref1	28.1	33.82	9.06	13.62	16.67	13.27	-0.699412	3.36e-35
Rpl41	2825.6	2422.77	1922.1	2752.75	2178.09	1708.53	-0.109352	3.41e-35
Nebl	5.27	5.15	9.39	6.41	8.4	13.42	0.450693	3.76e-35
Cd4	1.22	0.72	0.69	1.6	5.33	1.11	1.57819	3.93e-35
Pde4dip	19.82	15.26	14.9	20.12	22.41	19.47	0.314715	4.12e-35
Rinl	2.14	2.31	2.19	5.59	6.74	2.13	1.12133	4.14e-35
Tbc1d14	19.33	16.95	12.72	24.04	20.58	18.64	0.390739	4.54e-35
Rab11fip1	26.19	22.66	25.76	28.44	32.31	26.03	0.24538	4.93e-35
Cnbp	149.77	201.53	236.12	166.39	138.28	208.31	-0.1934	5.27e-35
Lamc1	13.06	9.52	10.14	14.64	18.17	8.98	0.351399	6.83e-35
Gm15293	2.79	0	1.96	4.68	10.71	27.14	3.1536	7.14e-35
Snrpf	49.31	71.78	99.96	61.3	40.54	57.38	-0.47045	7.36e-35
Cyp27a1	21.7	24.01	38.34	38.87	39.84	34.68	0.428089	8.07e-35
Ncstn	98.24	85.15	84.21	112.04	103.67	94.58	0.209983	8.61e-35
Znrf3	7.43	7.64	8.81	11.25	11.33	9.54	0.422357	1.25e-34
Atf4	140.78	128.33	152.79	121.11	111.45	121.93	-0.245484	1.28e-34
Inhba	0.6	3.94	14.57	2.03	1.15	5.39	-1.18628	1.37e-34
D630039A03Rik	37.96	35.72	35.06	42.98	50	42.31	0.312761	1.4e-34
Pcdhgb5	0.37	0.05	0.08	1.45	1.43	0	2.51952	1.51e-34
Atp5h	356.53	353.31	419.47	312.2	278.83	358.03	-0.246126	1.55e-34
Cdc20	41.88	45.34	42.19	42.36	28.86	25.49	-0.416921	1.72e-34
Fam214a	1.71	3.37	3.52	3.72	8.31	3.41	0.834182	1.88e-34
Nr1d2	3.27	7.5	7.52	8.32	10.31	8.7	0.576236	1.96e-34
BC005561	0.35	3	4.44	0.29	0.58	2.72	-1.12145	1.99e-34
Pabpn1	97.49	147.24	205.09	126.2	98.95	151.62	-0.222725	2.12e-34
Ogn	2.85	2.73	1.45	1.34	11.17	3.19	1.1411	2.29e-34
Cep55	6.67	14.96	15.62	7.56	5.82	9.16	-0.699093	2.61e-34
Cfdp1	26.29	58.85	81.25	31.94	29.07	60.88	-0.45048	2.61e-34
Tlr12	1.82	0.57	0.94	2.34	5.46	1.12	1.41069	2.93e-34
Fdps	233.8	175.94	175.94	195.78	133.28	170.18	-0.224022	4.24e-34
Bag1	153.84	174.47	203.4	140.83	130.61	183.08	-0.227414	4.62e-34
Nedd9	20.43	21.6	18.15	28.2	24.39	23.42	0.34397	4.69e-34
Por	55.46	39.99	31.38	62	49.92	45.08	0.310916	5.24e-34
Adgrg1	46.62	37.67	42.98	59.47	43.75	49.15	0.267013	5.39e-34
Kif1b	11.92	12.11	11.75	13.43	16.21	14.06	0.30501	5.92e-34
Tnfaip2	7.71	5.11	4.33	9	13.68	4.51	0.667346	6.7e-34
Aldh2	242.77	179.67	64.03	183.93	206.05	159.91	0.155694	8.7e-34
Ndufa8	139.93	148.19	159.3	114.82	101.4	135.95	-0.346073	1.07e-33
Eprs	21.48	39.95	51.13	21.98	21.08	43.66	-0.300827	1.34e-33
Cox6c	246.77	276.57	269.16	201.35	210.11	229.19	-0.308687	1.35e-33
Ddb1	137.14	105.94	86.79	146.81	120.85	98.61	0.151991	1.38e-33
Gm41035	0	3.93	0	0	0	0	-8.30132	1.41e-33
Ncf1	4.41	3.64	4.12	6.8	11.58	3.87	0.866913	1.65e-33
Foxm1	13.62	12.19	14.74	11.58	8.69	8.96	-0.470106	1.81e-33
Sepp1	125.24	74.72	40.41	61.02	139.4	87.86	0.252124	1.87e-33
Ptpre	6.63	6.13	7.6	9.27	11.08	8.64	0.513131	2.16e-33
Ndufa9	96.28	112.31	120.11	88.22	75.44	104.44	-0.294415	2.17e-33
Tln1	33.58	20.57	25.14	31.73	39.12	21.2	0.217008	2.43e-33
Tcf7l1	20.23	23.41	11.66	8.94	14.74	15.51	-0.502463	2.58e-33
Cmpk2	5.52	4.34	4	4.52	12.78	6.32	0.758575	2.59e-33
Sectm1b	77.12	47.93	72.71	75.3	98.41	61.3	0.260374	2.91e-33
Oas1g	14.36	12.4	7.15	10.58	28.54	13.68	0.62878	3.27e-33
LOC102634296	3.82	0	0	0	0.03	0	-7.13805	3.43e-33
Mfap4	7.79	10.22	4.28	8.83	26.47	5.64	0.856956	3.96e-33
Fam133b	5.07	14.49	19.49	4.88	6.63	12.84	-0.685652	4.02e-33
Itga6	79	67.82	77.72	90.72	69.69	89.16	0.15388	4.67e-33
Itpr3	33.59	19.89	19.76	31.8	28.52	24.69	0.21488	4.72e-33
Gm40991	36.45	46.7	47.97	43.7	25.09	36.07	-0.318688	5.11e-33
Zc3h7a	18.7	35.51	50.87	17.45	26.41	38.1	-0.334107	5.12e-33
Eif5a	645.68	681.51	691.46	715.22	511.43	607.94	-0.11828	5.72e-33
Ndufa12	164.29	163.75	191.73	141.4	109.89	151.1	-0.36865	6.19e-33
Lipa	14.84	16.92	10.65	18.33	23.64	16.92	0.469902	6.61e-33
Entpd1	3.86	2.3	1.83	4.85	7.62	1.85	0.855983	6.77e-33
Atg2a	16.22	13.45	15.56	20.51	21.93	13.41	0.374524	7.15e-33
Aldh1l1	92.9	87.23	79.81	115.24	82.54	99.88	0.195824	8.11e-33
Wasf2	46.18	30.98	26.8	47.16	44.94	30.12	0.230742	8.68e-33
Tmem254a	9.31	9.37	14.52	5.69	4.89	8.84	-0.785567	9.5e-33
Gimap1	6.06	4.54	3	4.54	10.96	13.1	1.06121	1.05e-32
Pabpc1	408.23	865.41	636.23	711.19	502.47	640.59	-0.0802872	1.06e-32
LOC108169043	66.13	56.76	67.05	62.57	92.25	70.73	0.263958	1.1e-32
Rhbdl2	40.38	42.9	34.15	20.64	26.29	37.17	-0.481845	1.1e-32
Thoc7	47.11	71.63	113.22	46.9	43.12	80.53	-0.431214	1.1e-32
Bud31	69.23	103.01	150.46	78.43	70.47	101.28	-0.368368	1.14e-32
Cyp4f18	2.68	2.06	2.97	4.74	10.63	3.15	1.26298	1.23e-32
Arg1	25.78	22.55	39.65	48.93	14.27	57.69	0.463987	1.24e-32
Ncapg	3.03	9.02	10.36	3.26	3.36	7.13	-0.709651	1.59e-32
Slc1a4	14.24	19.99	14.79	25.77	22.16	16	0.384285	1.59e-32
Tubb6	35.74	23.94	43.38	30.26	25.75	19.1	-0.454203	1.72e-32
Amd1	46.28	59.54	56.44	39.98	39.51	56.05	-0.261568	1.75e-32
Sla	1.69	1.55	1.33	2.93	6.65	1.81	1.29524	2.02e-32
Ulk1	18.89	15.54	18.65	24.63	23.82	17.57	0.337456	2.02e-32
Trim10	1.5	1.07	2.96	3.59	4.87	5.08	1.29524	2.02e-32
Xbp1	128.65	120.28	113.7	129.69	161.93	123.6	0.192722	2.1e-32
Iigp1	1.44	2.36	1.68	2.11	6.55	3.8	1.15882	2.32e-32
Cyba	385.05	383.57	706.72	587.58	488.41	580.13	0.167968	2.36e-32
Minos1	32.97	39.85	50.36	30.84	27.37	39.14	-0.339969	2.38e-32
Eif2s3y	9.28	29.26	4.9	12.29	19.44	33.48	0.592585	2.59e-32
Celsr1	26.58	17.67	17.98	30.21	22.26	19.54	0.242061	2.71e-32
Cct4	66.16	107.83	119.45	71.63	70.77	105.01	-0.247878	2.85e-32
Sema4c	13.93	12.56	17.61	21.38	17.85	17.97	0.424074	2.9e-32
Il2rb	0.96	0.92	0.53	1.96	4.3	0.9	1.45504	2.96e-32
Ndufb9	287.04	266.38	231.68	210.88	202.25	238.97	-0.269353	3e-32
Mycl	28.34	27.25	24	38.83	29.01	31.57	0.327458	3.15e-32
Sult1c2	9.34	8.42	1.85	0.89	1.62	5.25	-1.34534	3.43e-32
Sorl1	20.72	15.45	7.73	16.6	21.11	15.51	0.260735	4.16e-32
Pnn	12.94	32	39.23	15.63	19.9	30.57	-0.352297	4.45e-32
Myo1g	1.55	1.36	1.14	2.57	5.79	1.35	1.25222	4.66e-32
Ran	149.42	155.84	148.73	155.84	105.01	138.78	-0.181673	5.1e-32
Ppp1cb	45.02	66.5	51.1	51.62	61	76.12	0.213031	5.1e-32
Uqcr10	360.03	443.7	378.77	296.82	306.04	379.71	-0.268217	5.36e-32
Ednra	2.93	1.95	1.49	3.45	7.02	2.23	0.988354	5.45e-32
Jun	112.66	83.14	144.93	153.36	113.68	114.69	0.166716	5.69e-32
Ces1d	12.94	1.97	0.3	0.8	3.79	1.66	-1.29815	5.7e-32
Aqp3	5.96	0.08	0.03	0.28	0.48	0.1	-2.83251	6.26e-32
C3ar1	0.95	1.11	0.95	1.89	3.83	1.52	1.26155	6.35e-32
Hp	15.34	36.4	31.79	52.5	18.76	45.52	0.489796	6.64e-32
Dync1li2	26.47	24.42	19.37	28.81	30.1	26.98	0.295191	6.69e-32
Fabp2	4.36	18.36	1.4	2.6	4.64	1.11	-1.53765	6.72e-32
Eml2	21.17	17.58	13.11	28.38	24.2	19.73	0.480982	6.77e-32
Smc6	4.09	11.69	14.67	3.83	5.32	12.68	-0.50443	7.36e-32
Atp5j2	447.64	401.48	435.86	391.39	339.98	356.02	-0.24063	7.92e-32
Cystm1	199.61	174.93	171.45	242.04	223.91	208.54	0.304616	7.99e-32
Tfcp2l1	27.35	21.54	7.28	10.2	21.8	15.22	-0.257991	8.92e-32
Rbm8a	23.44	30.6	43.29	23.34	20.8	30.84	-0.376563	9.21e-32
Ccnl2	62.22	97.53	136.08	61.77	83.5	94.89	-0.213427	9.76e-32
H2afx	87.02	71.24	80.75	75.04	53.05	62.26	-0.326366	1.08e-31
Asap2	15.18	11	11.08	17.2	17.64	12.92	0.371876	1.14e-31
Qsox1	58.03	59.51	37.91	65.22	60.57	61.39	0.25878	1.14e-31
Rsad2	1.93	2.32	1.39	1.89	6.59	3.07	1.01839	1.15e-31
Adcy7	1.91	1.41	1.58	2.08	5.71	1.37	0.909951	1.33e-31
Zbtb7c	6.84	5.96	6.26	9.53	9.83	8.4	0.551715	1.5e-31
Pbk	19.6	25.5	29.28	15.25	12.54	22.04	-0.562604	1.56e-31
Cnp	34.27	33.79	27.03	46.09	37.85	36.95	0.362746	1.8e-31
2510009E07Rik	8.32	7.37	7.99	9.19	14.39	9.24	0.466411	2e-31
Sprr1a	19.22	15.88	32.54	14.37	10.47	11.29	-0.901154	2.5e-31
Aldh3a2	30.8	31.39	23.25	35.69	40.41	30.53	0.32259	2.78e-31
Papss1	73.01	41.66	39.84	37.42	46.41	42.43	-0.292442	3.11e-31
Tomm6	129.96	153.02	168.89	133.29	103.65	134.31	-0.282991	3.21e-31
Ctsl	80.75	98.93	122.86	104.17	112.07	141.29	0.239766	3.39e-31
Ldhb	12.37	5.47	13.95	15.14	18.53	19.93	0.759971	3.8e-31
Il10ra	1.78	1.53	1.78	3.28	5.65	1.96	1.09171	3.86e-31
Strip1	30.74	29.26	32.13	41.25	36.31	36.3	0.305641	4.03e-31
Rnase1	13.9	14.29	26.16	27.85	28.44	31.31	0.688138	4.32e-31
Tnfrsf13b	0.86	0.54	0.44	0.83	4.68	1.15	1.86401	4.47e-31
Nek2	12.98	15.76	11.7	10.39	8.23	9.3	-0.534123	5.37e-31
Tmem119	14.76	16.17	15.02	24.18	28.82	12.69	0.514576	5.43e-31
Bglap3	34.78	15.55	47.14	25.54	49.07	75.3	0.604101	5.53e-31
Gbp5	1.08	0.88	0.69	1.46	4.06	2.1	1.51195	5.68e-31
Slc5a3	3.02	3.57	2.91	1.46	2.09	2.73	-0.603593	5.86e-31
Map1lc3b	99.73	94.47	91.97	119.57	128.03	91.07	0.241997	6.13e-31
Arhgap30	1.91	1.68	1.4	2.2	6.13	1.63	0.984581	6.86e-31
Fcgr2b	7.9	7.07	6.83	9.87	21.85	8.05	0.862212	9.69e-31
Gsta1	23.18	16.73	12.05	7.63	8.51	9.9	-0.999922	1.05e-30
Gabarapl1	25.7	29.02	26.54	40.19	41.21	28.11	0.429999	1.09e-30
Lrrk1	17.93	16.59	19.38	24.68	22.2	16.77	0.294697	1.2e-30
Dyrk1b	10.02	10.24	9.99	16.24	16.09	9.28	0.41794	1.21e-30
Trp53inp2	64.76	49.88	54.63	62.28	73.92	59.32	0.206378	1.23e-30
Smarca5	12.48	28.83	36.68	13.97	15.97	33.32	-0.305326	1.3e-30
Mrpl33	59.14	112.62	137.66	63.41	57.17	96.87	-0.509948	1.45e-30
Antxr1	4.16	4.12	3.33	5.32	9.04	3.67	0.631031	1.45e-30
Natd1	5.02	3.68	3.01	7.27	7.48	4.27	0.699821	1.51e-30
Tcof1	18.77	18.53	20.96	18.43	11.9	14.69	-0.36098	1.53e-30
Lasp1	167.51	126.21	125.07	158.03	161.76	141.9	0.142047	1.61e-30
Man2a1	16.32	21	17.71	19.93	24.43	22.89	0.286045	1.62e-30
Pdcd5	41.1	76.04	101.62	46.37	41.15	64.87	-0.522023	1.64e-30
Ppp1r9b	44.01	29.73	38.51	48.76	49.16	34.59	0.239216	1.76e-30
Derl3	2.77	1.62	1.39	2.59	12.24	1.66	1.577	1.84e-30
Slfn9	4.96	9.67	15.94	3.73	5.03	13.75	-0.447657	1.94e-30
Rad21	45.13	64.39	64.48	48.31	47.86	50.96	-0.233018	1.97e-30
Nsf	25.34	20.85	15.06	26.84	24.77	26.06	0.341554	1.99e-30
Hspa9	85.41	130.84	119.16	93.81	75.25	127.72	-0.177131	2.06e-30
Hist2h3c1	12.08	0	0	0	0	0	-8.12621	2.07e-30
Wdr81	7.59	5.28	4.44	8.56	10.18	5.26	0.464763	2.29e-30
Fblim1	58.11	44.97	48.17	63.62	59.09	55.93	0.244252	2.3e-30
Tlx2	1.28	0.38	0.68	3.89	3.6	2.55	2.10435	2.32e-30
Tnks	3.91	2.98	1.61	4.76	5.42	3.28	0.660775	2.48e-30
Ifitm3	759.09	589.74	1262.14	997.61	944.63	920.99	0.133714	2.61e-30
Irf6	43.95	46.08	50.99	55.21	58.03	50.89	0.218698	2.89e-30
Denr	29.91	56.28	72.82	34.82	29.47	54.7	-0.440562	3.15e-30
Ccl21b	3.69	13.85	10.51	0	0	9.98	-1.49995	3.23e-30
Wdfy3	4.47	3.15	2.88	5.04	5.76	3.25	0.415926	3.3e-30
Ckap2l	6.97	11.1	12.35	6.16	6.13	7.37	-0.626417	3.31e-30
Tspan32	2.85	20.67	0.72	14.7	5.79	21.24	0.78387	3.77e-30
Cyfip2	0.93	0.45	0.21	0.74	2.89	0.49	1.3527	4.15e-30
Htra3	7.67	3.68	4.5	4.7	18.56	3.83	0.773421	4.83e-30
Serpine1	12.78	8.31	7.23	10.05	2.52	5.18	-0.663585	4.9e-30
Fam162a	86.95	145.96	136.45	81.13	81.99	118.88	-0.391492	5.27e-30
Etv4	13.33	16.36	12.79	10.6	9.88	7.14	-0.617743	5.34e-30
Ace	8.36	6.08	3.12	8.7	10.99	5.59	0.583664	5.36e-30
Cxcl9	0.82	1.2	1.01	1.64	4.56	2.06	1.43501	6.04e-30
Rasal3	1.05	0.78	0.72	1.54	4.75	0.65	1.41035	6.15e-30
Zc3h15	20.03	56.03	73.08	26.12	31.98	60.03	-0.339971	6.33e-30
Tor3a	13.39	8.95	8.69	11.53	22.26	10.21	0.497295	6.67e-30
Cd53	2.92	3.74	3.76	5.45	9.71	3.96	0.869637	6.76e-30
Xpo1	14.12	26.36	37.78	15.75	19.04	28.46	-0.310474	6.92e-30
Hmga1-rs1	1.65	3.78	5.5	5.01	5.39	12.95	1.0947	7.19e-30
Fzd1	14.17	13.42	10.23	16.31	20.3	13.2	0.39417	8.34e-30
Syncrip	26.87	39.18	32.91	27.26	26.05	38.26	-0.255736	8.44e-30
Sptbn1	44.29	35.07	33.43	38.73	46.92	41.54	0.172028	8.89e-30
Fbln1	34.34	28.66	30.56	50.29	40.88	25.19	0.325903	9.01e-30
Atp5f1	125.67	160.9	153.89	109.66	112.81	158.65	-0.211226	9.56e-30
Man2a2	6.81	6	6.27	7.98	12.08	6.53	0.502873	9.72e-30
Fbn1	2.65	2.17	1.11	2.95	5.19	1.09	0.635759	1.08e-29
Eef1b2	242.07	340	277.96	295.79	227.8	257.89	-0.137059	1.13e-29
H2-Q6	5.81	4.54	1.7	4.66	20.25	4.69	1.28189	1.24e-29
Nemf	4.3	16.31	23.19	5.9	7.69	18.28	-0.459891	1.46e-29
Eif3f	253.04	202.21	192.63	275.42	247.65	205.45	0.169492	1.76e-29
Kdm2a	25.15	25.51	23.1	29.9	31.78	25.93	0.249035	1.78e-29
Ola1	25.14	44.53	46.29	25.76	21.47	42.06	-0.368242	1.82e-29
Serpinb6a	136.21	205.22	126.34	117.85	132.76	151.42	-0.21866	2.16e-29
Sptan1	49.22	39.06	43.35	49.33	50.72	47.22	0.161774	2.64e-29
Pcna	125.2	153.1	195.88	121.67	87.17	194.95	-0.232063	2.87e-29
Vdac3	116.1	142.6	146.52	105.75	102.65	136.01	-0.236141	2.97e-29
Ecm1	93.38	38.77	74.71	78.51	112.99	56.58	0.260321	3.08e-29
Gnl3	13.89	25.5	30.53	13.54	12.78	22.89	-0.508203	3.53e-29
Tmod1	0.91	2.06	8	1.61	1.89	1	-1.26707	3.63e-29
Eps8l3	111.01	108.45	83.47	104.39	130.45	113.31	0.195949	4.41e-29
Msmo1	71.8	73.22	69.02	54.36	45.44	75.72	-0.287362	4.69e-29
Mmp12	4.55	13.61	8.81	13.96	10.11	19.02	0.681952	4.73e-29
Rac3	27.28	20.01	33.81	34.91	44.94	37.52	0.530816	4.79e-29
Sult1a1	28.95	21.79	5.96	4.23	13.72	15.9	-0.687934	4.98e-29
Col1a2	45.75	61.31	71.81	60.62	97.63	43.62	0.170403	5.02e-29
Tmem229b	3.5	3.38	3.33	6.46	7.11	3.86	0.752998	5.8e-29
Eif4a1	347.56	409.33	537.34	421.18	316.62	459.83	-0.110767	6.74e-29
Lgals7	24.36	2.34	3.58	3.89	1.68	3.42	-1.73598	7.38e-29
Csnk1d	80.74	68.81	63.61	86.84	79.04	76.39	0.183693	7.6e-29
Dhcr7	71.02	52.69	44.18	53.3	38.75	44.91	-0.283607	7.65e-29
Dock10	0.42	0.62	0.28	0.54	2.45	0.43	1.32263	7.76e-29
Ppfia4	0.82	0.8	0.65	1.28	2.8	1.06	1.1747	8.17e-29
Ugt1a6b	7.08	13.03	6.97	3.5	5.62	6.73	-0.779242	8.51e-29
Ahsa2	14.97	19.2	35.21	12.9	16.2	24.08	-0.387043	9.46e-29
Zfyve1	13.54	11.67	14.07	18.54	19.04	12.81	0.423638	9.53e-29
Sash1	11.03	10.47	7	10.62	16.35	9.64	0.363283	9.71e-29
Ces2f	1.45	1.61	1.61	2.75	3.15	3.11	0.866023	9.9e-29
Clec4n	9.23	9.47	11.5	15.17	26.18	10.35	0.785587	1.01e-28
Cs	210.65	163.99	136.57	158.51	154.53	149.97	-0.144186	1.04e-28
Avil	29.26	34.67	39.51	51.18	36.11	38.4	0.28619	1.1e-28
Il6st	21	9.92	8.38	15.87	23.95	10.19	0.342991	1.11e-28
Pik3ip1	2.87	3.13	4.29	6.71	9.45	3.71	0.932917	1.12e-28
Gstm7	15.57	12.02	17.57	25.47	18.86	24.89	0.64008	1.24e-28
Fxn	16.03	25.7	35.08	16.73	11.87	19.96	-0.659997	1.26e-28
Zswim4	7.5	5.84	6.37	11.01	10.91	6.45	0.525455	1.26e-28
Foxk1	13.58	9.12	6.54	15.34	14.03	7.8	0.348241	1.32e-28
Spsb1	11.49	5.75	9.12	14.42	16.88	7.18	0.536343	1.32e-28
Nsrp1	2.72	9.7	14.05	3.4	3.87	9.57	-0.656348	1.45e-28
Rassf3	42.93	34.84	33.82	44.13	47.87	41.59	0.264032	1.54e-28
Apol10a	1.59	11.37	0.3	1.01	5.6	0.17	-0.997376	1.67e-28
Tmem59	210.57	178.99	169.07	213.87	221.91	195.89	0.175856	1.7e-28
2610507B11Rik	51.6	41.22	30.16	47.84	47.45	43.16	0.168822	1.75e-28
Ptch2	0.79	0.36	0.3	1.3	2.62	0.82	1.68673	2.13e-28
Cygb	11.51	5.73	3.02	5.66	22.23	4.88	0.705186	2.14e-28
Mybbp1a	53.11	54.2	61.11	61.39	36.88	47.32	-0.206366	2.23e-28
Prom2	1.18	0.47	0.92	2.05	2.3	1.93	1.28161	2.32e-28
Zfp950	3.68	10.74	18.6	4.12	6.64	11.8	-0.51388	2.33e-28
Kif26b	4.57	1.87	3.37	4.51	5.08	3.51	0.459543	2.36e-28
Snrpe	103.35	181.83	220.44	127.14	102.43	163.21	-0.364116	2.52e-28
Adarb2	3.49	7.72	7.38	3.16	2.65	6.2	-0.632695	2.57e-28
Synj2bp	5.37	13.82	17.27	5.96	8.52	14.42	-0.318658	2.7e-28
Dnm1l	14.3	30.05	40.01	13.58	16.71	34.98	-0.322383	2.72e-28
Abce1	15.46	34.09	40.26	18.96	18.63	35.39	-0.301503	3.08e-28
Ltb	7.89	3.34	2.97	7.36	19.55	3.88	1.10759	3.11e-28
Atp11a	18.22	11.79	22.1	19.21	21.75	19.65	0.245477	3.43e-28
Calcb	6.01	0.34	1.77	0.52	1.55	0.77	-1.71318	3.44e-28
Nectin2	78.48	53.07	76.83	88.22	88.09	67.55	0.231073	4.16e-28
Dgkd	26.1	24.18	17.34	29.97	29.53	21.52	0.256044	4.42e-28
Fgfbp1	32.34	28.46	17.14	14.01	13.72	23.45	-0.612042	4.5e-28
Srsf1	42.56	61.81	66.27	46.93	44.46	59.62	-0.178796	5.15e-28
Sema4d	11.54	7.75	8.8	14.78	15.03	8.22	0.435772	5.23e-28
Myo7a	5.13	4.24	6.25	7.73	6.39	7.24	0.459091	5.55e-28
Cox6b1	558.75	574.85	552.44	509.22	459.89	506.43	-0.192845	5.67e-28
Ak2	121.37	122.19	112.2	101.48	92.2	112.02	-0.219656	6.22e-28
Unc5b	19.03	10.09	6.94	13.11	20.29	12.42	0.340386	6.53e-28
Lef1	10.02	6.54	16.33	15.29	16.16	12.52	0.49211	6.76e-28
Tmpo	58.86	66.36	79.42	59.1	45.64	69.45	-0.204651	7.74e-28
Mrpl42	54.89	108.33	118.15	52.01	52.58	103.81	-0.420797	7.86e-28
Tbrg4	39.65	42.97	37.84	36.34	30.5	34.12	-0.283179	8.19e-28
Mrc2	2.47	2.46	1.47	3.76	5.4	1.64	0.752679	8.94e-28
Ptpra	16.06	17.19	11.56	19.14	21.01	17.69	0.41091	9.35e-28
Rcc1	40.94	37.83	38.41	36.52	22.4	33.49	-0.339729	1.13e-27
Gm12250	2.07	1.52	0.36	1.02	6.72	1.99	1.2861	1.14e-27
Abcc2	3.86	4.39	4	7.94	8.49	1.89	0.580665	1.19e-27
Rack1	1042.01	1077.88	990.07	1082.39	920.93	926.1	-0.0858592	1.26e-27
N4bp1	14.26	13.3	12.64	17.76	17.1	14.95	0.307225	1.26e-27
Tmem131	30.36	26.84	17.77	32.13	32.77	22.8	0.225786	1.44e-27
Ccng1	11.47	38.58	27.37	17.46	21.07	22.95	-0.336787	1.5e-27
Tor1aip1	18.2	17.14	13.1	18.94	25.8	16.94	0.377188	1.51e-27
Fermt3	3.83	3.19	3.25	4.94	10.75	3.28	0.875369	1.62e-27
Ifitm2	496.5	486.34	558.09	690.55	458.48	575.17	0.164798	1.64e-27
E2f8	9.42	7.06	7.8	5.25	3.92	6.52	-0.632927	1.65e-27
Zc3h14	16.06	24.67	33.38	13.37	16.55	27.4	-0.38055	1.77e-27
Cd300a	1.36	1.07	1.58	2.78	6.03	1.79	1.0988	1.81e-27
Ndufa5	53.13	94.75	103.72	43.63	42.98	91.77	-0.500217	1.88e-27
Grina	46.64	38.59	53.61	57.61	65.79	50.06	0.319481	1.98e-27
Cfl1	728.88	912.02	1252.52	1042.58	751.38	918.19	-0.0909253	2.14e-27
Nfe2l1	65.19	53.81	50.23	65.45	67.13	56.57	0.195235	2.24e-27
Cry1	16.53	6.65	8.26	5.72	6.54	8.21	-0.625777	2.28e-27
Cd72	3.38	3.85	4.09	4.66	15.58	3.54	1.10095	2.29e-27
Utrn	16.75	17.23	26.65	19.95	24.48	26.99	0.257673	2.3e-27
Coro2a	73.43	64.2	45.25	44.55	57.31	57.66	-0.201935	2.57e-27
Mcpt4	2.21	2.73	0.57	3.35	13.63	0.92	1.6851	2.67e-27
Ppif	50.29	43.35	27.73	29.91	27.78	33.47	-0.408764	3.65e-27
Fcrls	1.96	2.82	1.92	4.36	8.37	2.16	1.16368	3.65e-27
Bcap31	131.65	145.86	193.31	132.81	122.66	147.74	-0.22333	3.84e-27
Selm	67.34	75.28	33.48	41.27	55.62	31.88	-0.455816	3.89e-27
Ube2l6	17.45	12.87	12.15	16.47	32.19	16.44	0.609444	4e-27
Capn11	0.44	0.21	4.99	0.42	0.61	0.03	-2.13796	4.22e-27
AI467606	3.13	6.33	2.08	4.36	15.92	2.07	0.93587	4.37e-27
Eif4ebp3	35.62	49.93	33.34	22.45	33.02	29.66	-0.48702	4.51e-27
Tstd1	97.68	91.22	64.74	53.81	64.77	62.34	-0.491035	4.55e-27
Ldhd	4.59	6.59	6.43	10.8	7.31	11.05	0.729547	4.76e-27
Prc1	17.42	22.84	25.15	17.13	13.78	18.8	-0.397529	5.11e-27
Gng5	258.11	257.87	399.57	240.52	227.02	301.76	-0.251764	5.11e-27
Adck3	13.96	6.79	2.48	4.03	6.49	3.26	-0.751301	5.22e-27
Ahnak2	3.61	1.32	1.75	1.06	2.11	1.07	-0.663177	5.44e-27
Rab11fip5	6.9	10.09	7.92	16.74	8.57	8.08	0.443035	5.45e-27
Dctpp1	63.2	75.81	81.15	57.81	48.62	51.11	-0.482071	5.48e-27
Gm5431	1.22	1.64	1.02	1.51	5.57	2.11	1.23011	5.94e-27
Pla2g2e	3.61	5.46	6.7	16.25	12.56	6.84	1.17609	7.05e-27
Trip12	18.64	24.07	23.8	22.86	26.13	28.46	0.218827	7.14e-27
Manba	12.83	11.23	8.63	14.61	16.3	13.37	0.435573	7.22e-27
Ifngr1	84.33	86.01	73.3	90.76	102.59	90.94	0.220275	7.56e-27
Eny2	11.18	20.06	26.52	10.71	10.75	20.44	-0.460605	7.67e-27
Ndufa6	223.49	226.64	247.35	167.09	184.62	223	-0.281853	7.86e-27
Rbm3	256.41	237.08	236.54	195.57	170.93	288.84	-0.167056	8.22e-27
Cx3cl1	40.98	25.78	15.88	32.06	42	28.2	0.303148	9.21e-27
Uqcr11	340.97	313.55	316.6	291.72	235.43	276.47	-0.272608	9.22e-27
Perp	130.32	143.97	134.2	110.19	112.36	135.56	-0.191845	9.23e-27
Stat3	67.75	60.31	45.87	75.12	62.99	58.65	0.177921	9.33e-27
Pcbp2	243.43	257.2	299.86	256.67	232.8	238.02	-0.140878	9.34e-27
Spi1	9.24	6.13	8.03	12.26	18.78	7.89	0.788055	9.38e-27
Aqp1	19.92	17.43	6.92	23.83	22.54	13.38	0.432488	9.52e-27
Psma4	66.36	114.37	155.82	75.27	74.06	126.71	-0.283322	1.02e-26
Tcf12	20.07	22.23	27.64	27.4	30.2	27.28	0.284988	1.07e-26
Spef1	15.13	13.72	28.49	15.37	13.94	11.38	-0.493144	1.09e-26
Son	24.06	35.5	40.54	24.29	30.74	33.72	-0.184986	1.12e-26
Ltbp1	5	2.45	4.97	4.65	10.15	3.84	0.559873	1.17e-26
Srsf6	62.56	90.7	106.69	77.82	68.68	83.85	-0.174355	1.21e-26
Ncapd2	30.82	27.3	23.05	26.23	20.48	19.94	-0.282245	1.22e-26
Eef1d	141.34	176.81	210.28	161.68	130.94	156.19	-0.23036	1.28e-26
Ptch1	5.17	5.61	3.59	6.61	8.82	4.63	0.501505	1.44e-26
Kmt5a	62.5	81.04	83.5	62.51	64.91	67.63	-0.216549	1.5e-26
Dynlrb1	129.67	168.39	293.29	146.64	139	205.36	-0.268348	1.64e-26
Ndufb4	188.82	181.27	225.43	150.44	119.91	199.22	-0.343044	1.65e-26
Rbbp6	9.95	20.04	26.6	12.02	13.38	20.81	-0.311086	1.74e-26
Cxadr	32.99	39.55	35.15	39.07	45.56	40.62	0.218292	1.8e-26
Atxn7l3	46.58	33.89	36.88	49.69	45.88	41.33	0.239333	1.81e-26
Srek1	5.87	15.85	21.1	8.05	8.84	15.73	-0.367277	1.95e-26
Gm3776	25.15	22.47	8.08	7.63	6.41	16.65	-0.863924	2.26e-26
Lbh	15.58	12.91	11.12	16.1	27.52	9.94	0.42996	2.59e-26
Fndc1	2.79	4.01	2.52	4.87	6.12	3.25	0.618258	2.68e-26
Kcnab2	1.3	0.55	0.46	1.69	3.72	0.68	1.39892	2.77e-26
Hnrnpdl	32.41	64.23	62.29	40.96	42.16	51.02	-0.242851	2.91e-26
Pam	41.49	41.22	37.7	36.65	56.17	48.64	0.227093	3.04e-26
Gm4070	1.66	3.38	1.93	0.59	4.14	5.88	0.592509	3.04e-26
Usp22	44.97	47.51	55.32	65.52	49.8	53.32	0.192145	3.07e-26
Tmem140	6.94	7.17	8.05	11.74	14.69	11.01	0.646386	3.13e-26
Asah1	58.13	74.21	72.72	68.77	76.09	96.23	0.227067	3.3e-26
Ppp1r14b	217.19	233.43	330.9	270.76	174.2	234.06	-0.199648	3.43e-26
Phf11d	1.51	2.57	2.01	2.09	7.48	3.13	1.04886	3.53e-26
Parm1	77.52	41.14	32.97	58.28	70.67	54.64	0.272614	4.02e-26
Eif3j1	17.2	38.29	45.75	21.01	19.76	39.07	-0.344649	4.05e-26
Elf1	19.83	22.32	18.07	22.11	27.64	25.16	0.317944	4.1e-26
D8Ertd738e	126.73	150.71	182.91	127.89	112.53	133.84	-0.306092	4.15e-26
Zc3h11a	29.82	53.28	71.67	34.85	42.09	57.75	-0.199515	4.36e-26
Npm3	58.24	69.62	65.99	53.02	35.91	54.9	-0.429265	4.39e-26
Syt13	3.73	2.47	2.1	3.54	8.9	2.05	0.79251	4.47e-26
Tef	10.22	3.71	8.05	10.43	10.93	9.5	0.489532	4.48e-26
Sash3	2.19	1.32	1.01	2.62	6.14	1.61	1.18539	4.49e-26
Sema4a	53.56	47.63	28.64	51.25	57.36	44.94	0.240602	4.61e-26
Fbln7	0.56	0.52	0.31	1.07	3.76	0.55	1.8464	4.7e-26
Fzd10	2.37	0.53	1.08	3.64	2.59	2.88	1.19354	4.77e-26
Usp19	38.25	30.68	33.12	43.48	46.37	29.24	0.2219	5.11e-26
Zfp970	6.9	16.58	20.7	12.18	9.78	12.03	-0.376794	5.19e-26
Sox17	9.46	13.16	18.22	18.77	15.06	19.38	0.392567	5.34e-26
Taldo1	268.6	265.14	229.64	323.14	265.62	263.39	0.159434	5.52e-26
Pim1	18.49	15	22.58	26.18	31.35	20.28	0.471508	5.66e-26
Slc6a8	138.43	79.24	63.28	80.5	78.32	93.83	-0.155494	6.07e-26
Cenpc1	7.69	17.35	19.27	7.85	10.09	15.28	-0.421499	6.79e-26
Tet3	16.66	11.56	12.08	16.67	18.88	11.78	0.230008	7.11e-26
Ces2a	28.4	10.04	3.66	6.07	10.7	10.76	-0.62119	7.64e-26
Zfhx3	1.78	3.41	6.41	2.13	3.12	3.31	-0.436051	7.73e-26
Esyt1	30.35	18.72	15.56	26.72	32.8	20.75	0.309654	9.24e-26
8030474K03Rik	3.29	0	0	0	0.04	0	-6.71848	9.77e-26
Prss56	3.9	1.15	0.94	5.91	6.81	0.36	1.15768	1e-25
Myl12a	220.89	179.99	249.88	272.66	232.99	214.56	0.184651	1.07e-25
Arid5b	7.32	7.59	7.75	10.14	10.13	8.84	0.370704	1.11e-25
Plk1	46.95	50.24	50.38	49	35.07	36.09	-0.293988	1.2e-25
Gm2436	4.71	2.36	9.78	1.36	1.69	2.73	-1.83342	1.24e-25
Topbp1	11.3	16.56	18.47	11.06	9.08	16.34	-0.346493	1.26e-25
Ube2e2	17.05	13.57	12.9	23.3	21.53	20.18	0.580227	1.29e-25
Itgae	0.91	1.09	1.54	2.14	4.43	1.18	1.11506	1.37e-25
Sidt1	20.05	25.24	27.41	33.88	25.61	27.38	0.284462	1.43e-25
Hspg2	12.19	5.95	5.09	10	13.45	4.49	0.263179	1.44e-25
Csnk1a1	113.36	111.24	94.53	120.76	126.4	126.31	0.145681	1.44e-25
Slamf7	0.43	0.41	0.25	0.61	2.85	0.77	1.91196	1.47e-25
5031439G07Rik	18.77	14.59	10.1	20.86	19.15	14.29	0.320792	1.49e-25
Ctbp1	122.6	113.43	113.19	123.09	106.52	72.01	-0.180963	1.56e-25
Pdgfrb	6.39	5.37	5.82	9.81	10.12	4.32	0.475257	1.62e-25
Golph3l	47.69	64.95	37.75	32.21	46.81	44.93	-0.260869	1.64e-25
Smpd3	66.03	54.47	55.99	77.42	56.19	63.83	0.163709	1.7e-25
Atp5k	221.23	245.98	218.75	188.47	160.5	186.04	-0.358633	1.82e-25
Gsr	84.24	70.97	69.62	96	71.96	89.64	0.197221	1.92e-25
Tnf	7.47	6.01	18.52	17.32	14.94	16.93	0.622451	2.11e-25
Pald1	3.8	1.81	3.06	5.28	5.83	3.25	0.732237	2.13e-25
Kifc1	20.48	21.72	22.59	19.13	12.79	13.6	-0.462161	2.21e-25
Gpcpd1	12.97	17.53	23.26	22.55	21.54	24	0.342279	2.23e-25
Rab3il1	2.95	2	2.62	4.83	7.66	3.02	1.03552	2.3e-25
Ankfy1	15.88	13.39	10.88	16.38	18.73	14.14	0.279361	2.41e-25
D17Wsu92e	69.1	56	52.93	70.67	69.7	61.24	0.188484	2.54e-25
Slc38a10	40.32	32.36	27.44	43.98	42.99	30.68	0.24393	2.64e-25
Dtx4	14.39	11.12	13.82	16.19	16.41	16.44	0.334408	2.73e-25
Fnbp1	14.1	9.74	13.75	12.34	24.13	11.41	0.354341	2.84e-25
Luc7l2	26.61	42.54	45.19	27.4	29.81	39.45	-0.235351	2.84e-25
Dcaf8	36.3	42.92	43.19	49.2	47.43	46.45	0.222549	2.87e-25
Bora	5.47	9.62	11.63	5.51	4.36	7.47	-0.658815	3.16e-25
Zfp503	9.28	4.24	9.27	8.93	12.73	9.92	0.46728	3.17e-25
Timm8a1	29.34	48.26	56.22	29.65	22.08	48.31	-0.420073	3.38e-25
Adam28	0.94	1.16	2.03	0.95	0.92	7.3	1.02752	3.45e-25
Mcl1	115.48	93.59	82.32	82.72	98.19	80.12	-0.160613	3.59e-25
Pdia6	118.25	138.4	142.2	122.21	103.72	126.84	-0.177082	3.77e-25
Tbc1d9	1.94	1.11	1.3	3.01	3.71	1.21	0.874189	3.99e-25
Specc1l	16.12	14.21	10.52	15.66	21.4	13.35	0.29915	4.1e-25
Tspo	293.62	228.49	261.25	322.7	263.69	305.3	0.187371	4.45e-25
Ptprb	1.11	1.11	0.55	1.59	2.29	0.81	0.754639	4.77e-25
Dab2ip	39.33	26.3	24.32	40.47	36.77	24.74	0.208322	5.24e-25
Calr	625.6	519.37	663.11	604.82	519.06	579.9	-0.0853602	5.42e-25
Caprin1	69.75	100.35	87.83	90.74	85.2	109.97	0.148414	5.42e-25
Ip6k1	30.28	24.35	22.11	30.08	38.56	23.26	0.257244	5.58e-25
Ptp4a1	37.24	63.91	63.83	41.49	42.95	59.78	-0.195978	5.61e-25
Dtymk	78.49	73.61	80.22	64.43	46.32	66.98	-0.388228	5.67e-25
Lax1	1.56	0.4	0.35	0.81	5.96	0.39	1.61792	5.98e-25
Mob1a	31.8	33.33	20.74	33.44	39.12	32.27	0.277866	6.34e-25
Mtcl1	2.54	3.02	2.26	4.76	3.84	3.2	0.592327	6.34e-25
Ptprs	16.52	12.19	18.94	20.77	20.8	16.08	0.295924	6.64e-25
Bpifb1	0.84	0.16	0.36	0.46	5.71	0.27	2.24746	6.64e-25
Pak1	48.42	55.26	71.18	67.5	56.63	77.67	0.206813	7.24e-25
Il17rc	42.71	33.3	20.66	23.63	30.8	21.72	-0.352863	7.51e-25
Chordc1	21.14	29.68	42.58	17.6	23.83	31.09	-0.368721	8.27e-25
Smc2	4.14	10.77	11.29	4.51	4.25	10.46	-0.44527	8.73e-25
Etv6	23.97	22.02	26.59	31.64	28.29	25.72	0.243839	8.88e-25
Csf1	9.95	8.93	15.79	13.6	17.45	12.44	0.405842	9.79e-25
Nr5a2	2.15	3.7	0.59	0.51	1.41	1.16	-1.10064	1.06e-24
Ndufa2	108.64	134.05	154.38	93.01	92.64	126.68	-0.347989	1.09e-24
Rnf10	128.76	115.18	109.07	135.59	131.08	116.22	0.152465	1.12e-24
Acp1	13.97	30.16	37.41	17.48	17.49	30.07	-0.328133	1.21e-24
Pcgf3	19.42	14.72	7.33	19.9	19.67	14.79	0.375413	1.24e-24
Slc7a11	1.81	3.98	3.48	3.36	2.96	6.86	0.497602	1.37e-24
Nedd8	176.81	232.09	286.76	198.75	161.72	220.96	-0.258254	1.4e-24
Rgs5	7.52	12.84	7.23	9.57	19.53	8.46	0.42947	1.4e-24
Abca9	0.26	0.25	0.17	0.41	1.56	0.39	1.77963	1.45e-24
Dpep1	10.97	15.78	2.73	4.92	10.49	2.67	-0.702371	1.53e-24
Ms4a7	4.28	5.08	4.75	5.2	15.75	6.78	0.968274	1.55e-24
Lsm5	26.5	42.48	55.26	24.65	16.71	34.13	-0.717964	1.57e-24
Gmnn	19.01	24.65	38.11	12.91	11.76	28.84	-0.614761	1.61e-24
Olfml3	8.71	7.91	9.88	11.97	21.27	8.5	0.650145	1.92e-24
Atf6b	43.82	31.38	28.53	46.93	40.37	39.13	0.285597	2e-24
Kazn	8.52	6.91	5.78	12.31	9.61	7.76	0.492513	2.01e-24
Catsperd	1.4	1.37	1.4	3.42	3.52	3.6	1.3544	2.02e-24
Pck1	16.96	15.42	2.21	4.75	10.64	8.08	-0.569755	2.02e-24
Trim62	5.17	3.59	4.33	7.55	6.89	5.77	0.65377	2.1e-24
Lamb1	9.98	8.92	10.51	12.32	18.02	7.24	0.356693	2.2e-24
Krtcap3	106.46	105.74	130.57	88.17	88.33	102.66	-0.297393	2.23e-24
Mboat1	53.93	53.38	35.07	38.22	44.69	36.94	-0.25324	2.3e-24
Mettl2	8.58	15.48	17.18	9.73	8.24	11.08	-0.52282	2.3e-24
Sord	43.19	46.79	22.16	46.31	58.9	32.53	0.293161	2.45e-24
LOC108167440	1.86	0.99	0.56	2.41	4.55	0.74	1.11939	2.61e-24
Bola2	108.52	141.16	182.52	108.25	80.18	124.94	-0.462755	2.75e-24
Srsf10	23.15	40.41	51.76	22.99	26.61	46.35	-0.274282	3.09e-24
Efemp1	4.01	2.97	1.94	3.26	11.07	2.97	1.06297	3.12e-24
Grb14	2.3	1.48	1.06	5.16	4.38	2.21	1.27668	3.15e-24
Wsb1	21.63	43.41	41.95	26.06	28.68	30.63	-0.314887	3.2e-24
Nrp2	6.29	5.61	2.34	6.53	9.86	3.49	0.474975	3.34e-24
Tgfb1	23.15	12.94	17.42	26.79	27.88	16.97	0.420451	3.43e-24
Tmc4	156.25	149.14	160.59	175.12	184.64	155.67	0.144336	3.45e-24
Plek2	43.78	66.47	63.4	52.82	33.65	53.01	-0.313952	3.64e-24
Sbspon	5.54	6.82	7.81	14.08	8.93	7.29	0.59239	3.68e-24
Tgtp2	3.15	1.92	2.38	2.18	8.45	3.5	0.910084	3.79e-24
Cd244	2.91	1.09	3.27	4.18	5.64	3	0.814018	3.9e-24
Entpd4	7.68	5.11	6.52	11.01	9.85	7.89	0.57815	4.04e-24
Gipc2	107.51	91.72	85.12	58.7	74.72	97.68	-0.273133	4.13e-24
Psat1	16.65	20.65	16.05	14.21	9.91	13.7	-0.494039	4.66e-24
Gale	215.43	207.16	203.75	188.68	154.51	217.92	-0.163542	4.7e-24
Amer2	1.17	1.31	3.11	2.73	3.13	2.29	0.892195	4.85e-24
Nuf2	5.43	10.66	13.03	5.52	4.31	8.26	-0.704428	4.91e-24
Mgat4b	107.75	99.16	51.92	73.32	85.74	66.57	-0.20117	5.21e-24
Pura	7.95	10.7	14.08	6.76	7.59	10.85	-0.421726	5.25e-24
Blvrb	64.86	90.99	75.67	120.02	85.3	84.04	0.333071	5.34e-24
Deptor	10.18	16.04	10.15	7.15	10.12	12.58	-0.29052	5.36e-24
Ndufb7	173.14	168.33	182.23	137.58	131.11	152.23	-0.316213	6.41e-24
Dlx3	2.72	0.35	1.83	2.94	4.32	3.41	1.12086	6.54e-24
Hhip	0.44	0.19	0.13	0.41	1.4	0.54	1.48472	6.76e-24
Pla2g7	13.11	12.92	25.24	18.44	35.54	16.82	0.476934	6.76e-24
Tk1	38.43	39.67	39.2	32.82	22.32	33.52	-0.415548	6.84e-24
Msn	18.33	17.12	20.4	27.06	30.03	12.32	0.313379	7.09e-24
Slc15a1	13	13.99	3.97	6.18	10.95	4.24	-0.541424	7.28e-24
Cytip	3.24	3.46	2.5	5.33	8.56	2.91	0.8353	7.85e-24
Hmmr	4.47	11.93	13.14	6.02	6.69	8.34	-0.490185	7.89e-24
Zhx2	7.87	7.12	6.53	10.99	10.48	8.16	0.465476	8.35e-24
Ksr1	13.24	9.51	9.5	12.64	18.14	9.71	0.32655	8.4e-24
Klf10	26.88	27.91	30.76	25.13	21.34	22.69	-0.314259	8.76e-24
Ccl22	1.15	0.65	1.31	2.78	5.19	1.23	1.56189	8.95e-24
Nasp	23.5	36.3	46.04	23.06	17.57	44.3	-0.335512	9.69e-24
Dcxr	77.3	72.91	66.55	88.12	90.2	94.03	0.327401	9.78e-24
Hnrnpl	170.01	142.85	185.52	171.38	133.24	144.19	-0.151867	1.01e-23
Psip1	8.31	17.43	32.69	10.97	12.36	20.74	-0.433352	1.08e-23
Ndc80	2.77	8.83	14.15	3.39	3.47	8.67	-0.730681	1.08e-23
Esd	120.6	149.01	164.58	121.57	110.79	147.51	-0.210264	1.08e-23
C6	0.31	0.28	0.17	0.68	2.29	0.63	2.22418	1.09e-23
Trim34a	4.21	5.86	6.07	5.46	12.71	7.57	0.670653	1.2e-23
Rhoj	22.46	23.36	24.76	39.84	27.18	22.87	0.352568	1.21e-23
Prpf39	5.34	12.78	19.89	6.2	8.95	13.32	-0.445002	1.21e-23
Itgav	9.99	11.2	11.7	14.71	15.03	10.79	0.299274	1.23e-23
Reg3b	12.86	256.79	24.84	294.61	12.62	53.03	0.310885	1.44e-23
B4galnt3	25.14	11.75	7.63	11.98	11.97	11.94	-0.305915	1.46e-23
Itgam	3.12	2.96	2.35	5.13	5.76	2.63	0.679993	1.5e-23
Pdgfc	1.99	1.07	1.54	3.29	4.08	2.07	1.14384	1.51e-23
Galnt2	22.65	14.48	15.01	22.29	26.25	16.2	0.31041	1.53e-23
Ppih	35.06	49.38	64.39	33.02	27.81	45.91	-0.469076	1.59e-23
Net1	89.92	87.63	83.34	97.66	84.01	107.43	0.147272	1.6e-23
Gm14137	7.54	6.9	10.28	11.18	12.95	11.04	0.506306	1.62e-23
Ilf2	42.71	53.56	75.6	45.86	39.53	56.64	-0.275069	1.62e-23
Dbf4	7.88	17.08	21.93	9.58	8.63	15.22	-0.491716	1.64e-23
Mcu	37.6	40.01	36.15	29.33	29.18	35.32	-0.279084	1.81e-23
Tead1	8.24	9.36	10.44	11.23	11.7	10.94	0.280605	1.85e-23
App	242.4	158.77	192.1	210.14	213.04	215.28	0.105842	1.88e-23
Mpzl2	41.8	31.23	47.66	52.36	39.41	48.7	0.235305	1.89e-23
Flnc	9.64	1.42	0.61	1.17	6.39	0.66	-0.509674	1.9e-23
Pip5k1c	28.89	22.82	26.48	35.16	32.21	25.67	0.251679	1.98e-23
Mcm6	35.07	38.72	38.44	31.86	20.37	40.89	-0.271595	2.05e-23
Phyh	63.45	66.4	56.81	62.04	65.66	99.07	0.277605	2.07e-23
Ets1	5.87	5.67	5.68	9.75	9.77	4.15	0.479204	2.12e-23
Cbl	7.39	4.51	1.91	6.19	7.96	4.06	0.396702	2.23e-23
Col23a1	1.87	0.55	1.33	1.33	2.93	2.7	0.892491	2.33e-23
Fbxw11	27.37	20.33	15.69	26.87	28.15	22.05	0.281744	2.34e-23
Lrrc45	50.69	55.08	95.05	69.82	93.79	75.96	0.245402	2.38e-23
Tbc1d10b	30.08	27.27	25.43	31.16	39.64	28.84	0.264408	2.46e-23
Ogfr	36.64	34.3	32.42	41.32	51.69	33.52	0.296722	2.68e-23
Naa50	18.52	30.13	34.74	19.58	18.61	31.68	-0.257013	2.82e-23
Slc25a45	4.45	6.56	10.59	10.75	12.66	9.97	0.650545	2.91e-23
Cpa3	0.85	1.92	1.11	2.02	8.59	0.85	1.54739	2.98e-23
Srgn	14.74	26.5	24.3	30.3	43.4	25.32	0.526895	3.13e-23
Mcm3	30.68	27.16	34.29	27.67	14.74	31.81	-0.30936	3.27e-23
Asb2	4.21	1.14	0.75	1.75	9.31	1.19	0.99036	3.46e-23
C5ar1	2.77	2.64	2.33	5.44	7.57	1.75	0.928328	3.7e-23
Tcp11l2	4.69	5.04	3.84	7.41	11.21	4.07	0.737159	3.7e-23
Ston1	3.87	2.58	0.73	3.37	7.67	2.35	0.898614	3.79e-23
Cd300c2	2.93	3.44	3.21	5.74	11.79	4.4	1.18797	3.84e-23
Fyco1	5.21	5.3	4.88	6.03	7.35	7.08	0.406179	4.08e-23
Arhgef12	11.19	9.28	10.29	12.47	14.21	10.04	0.258771	4.36e-23
Ankrd10	47.06	41.6	52.73	37.66	36.08	41.86	-0.280353	4.39e-23
Gm42267	28.73	9.83	12.26	34.38	16.29	24.99	0.578629	4.57e-23
Gm14295	6.77	21.64	29.66	13.91	11.1	15.68	-0.512092	4.72e-23
Slc11a2	29.49	21.13	24.33	28.33	33.1	29.06	0.285398	4.81e-23
Aes	380.85	333.52	402.9	350.78	341.93	335.91	-0.119938	4.92e-23
Nol8	2.02	7.04	9.2	2.37	2.95	6.54	-0.602618	5.28e-23
Higd1a	28.56	35.35	32.32	24	22.75	27.67	-0.377081	5.58e-23
Pdxdc1	100.22	114.81	62.28	72.68	85.91	90.75	-0.150549	5.84e-23
Pacsin3	15.27	14.49	18.6	26.78	21.02	18.74	0.461291	6.12e-23
Mdh2	307.66	279.8	300.9	288.27	231.43	283.62	-0.144632	6.13e-23
Twsg1	18.72	21.15	22.09	24.18	29.09	22.29	0.284254	6.15e-23
Col12a1	4.39	8.38	3.52	7.29	7.37	5.66	0.326848	6.59e-23
Pik3cg	1.29	1.29	1.28	2	3.49	1.44	0.821098	6.66e-23
Unc13b	12.99	11.67	12.78	14.72	13.19	17.9	0.290526	6.82e-23
Sh3bp1	6.42	3.86	4.63	9.42	9.9	4.61	0.691255	7.48e-23
Blnk	52.58	44.69	43.94	58.47	59.22	51.96	0.263661	8.03e-23
Bclaf1	9.51	28.09	31.67	11.62	16.47	26.16	-0.278728	8.5e-23
Adrbk2	1.67	1.93	3.41	3.06	3.95	3.81	0.623117	9.26e-23
Npl	3.04	1.73	0.73	5.14	6.27	2.68	1.35505	9.53e-23
Ndrg2	86.91	64.55	46.04	44.27	52.92	69.47	-0.247682	9.61e-23
Mbd3	87.36	94.25	118.76	96.06	75.63	84.27	-0.226771	9.61e-23
Hpf1	10.13	21.74	38.27	12.64	11.87	23.8	-0.531987	1.04e-22
Il16	1.83	0.86	0.92	1.78	5.65	0.78	1.13324	1.14e-22
Magoh	56.8	70.64	124.82	61	53.36	78.07	-0.390405	1.17e-22
Vopp1	20.83	19.09	26.97	27.23	25.2	30.62	0.321269	1.25e-22
Setd7	7.25	6.55	6.16	6.95	9.56	9.26	0.363814	1.32e-22
Slc15a3	4.42	3.8	3.68	6.78	8.65	5.05	0.780199	1.42e-22
Ugt1a7c	33.3	22.96	3.08	14.6	21.11	10.79	-0.357818	1.46e-22
Fbxo10	2	2.71	2.16	5.31	3.1	2.94	0.731655	1.52e-22
Tomm22	100.35	134.5	153.47	110.63	100.28	115.78	-0.249445	1.52e-22
Acer1	7.54	7.1	3.3	2.17	5.01	3.03	-0.822748	1.55e-22
Kbtbd11	3.52	2.24	0.53	2.21	4.35	3.28	0.638458	1.61e-22
Rhoq	11.43	14.07	15.89	19.32	14.74	18.21	0.33739	1.68e-22
Mvb12b	2.81	5.26	3.96	8.39	5.82	2.42	0.576376	1.69e-22
Hmbox1	12.19	11.24	13.06	13.64	15.51	11.77	0.306194	1.73e-22
Inhbb	3.09	3.63	4.08	8.63	4.14	3.75	0.62113	1.84e-22
Plbd2	21.32	15.52	11.9	22.95	22.32	16.21	0.334276	1.93e-22
Ggt5	3.68	2.98	2.99	5.27	8.77	3.11	0.857626	1.95e-22
Slc30a1	3.85	3.25	2.05	4.73	6.27	3.11	0.611692	2.03e-22
Rab7	132.1	118.73	118.54	138.22	147.67	124.7	0.16214	2.04e-22
Cbx7	10.78	6.79	6.66	9.26	15.15	10.07	0.503071	2.07e-22
Wnk1	16.21	17.6	17.34	18.38	22.15	18.33	0.20129	2.11e-22
Hnrnpa1	141.63	240.01	278.11	211.28	159.7	227.64	-0.138736	2.14e-22
Ddx17	117.11	117.26	145.72	135.97	149.05	127.47	0.120363	2.18e-22
Dnajc9	21.77	23.74	39.5	20.84	15.63	26.53	-0.431291	2.29e-22
Shmt2	34.36	39.9	43.7	40.4	23.17	31.94	-0.299885	2.44e-22
Mvd	69.52	57.26	72.88	62.73	44.73	58.78	-0.262539	2.44e-22
Crlf2	14.65	10.63	14.69	22.48	22.9	15.86	0.584126	2.57e-22
Pkdcc	20.46	16.01	4.4	8.07	13.25	6.77	-0.523657	2.8e-22
Mis18bp1	0.98	4.53	5.58	1.46	1.71	3.2	-0.801708	2.93e-22
Kif15	3.16	7.39	7.18	2.83	2.95	5.54	-0.626585	2.99e-22
Trp63	1.13	0	0.02	0.03	0	0.04	-4.53765	3.01e-22
Bmp5	3.04	4.25	4.19	4.65	8.23	4.97	0.630766	3.24e-22
Scnn1b	4.37	1.92	3.62	4.67	2.52	9.93	0.788891	3.44e-22
Dpysl3	11.82	12.43	15.45	19.23	16.25	13.54	0.303245	3.48e-22
Nolc1	28.92	32.06	34.51	29.07	19.77	30.76	-0.260806	3.53e-22
Tardbp	24.96	41.56	56.19	31.59	32.91	45.31	-0.158356	3.58e-22
Slc45a3	28.57	22.05	21.49	31.76	26.39	30.81	0.289481	3.61e-22
Sox4	46.56	87.22	137.65	71.79	59.11	110.55	-0.168982	4.23e-22
Gjb3	34.37	26.11	19.7	24.88	17.63	16.83	-0.427328	4.24e-22
Pfdn1	31.44	38.45	58.8	29.93	24.06	41.45	-0.431096	4.27e-22
Lmtk2	15.07	8.71	8.62	14.44	13.99	10.68	0.27249	4.57e-22
Lepr	0.7	0.59	0.7	0.92	2.3	1.19	1.1466	4.77e-22
Ptk7	23.24	17.38	22.91	32.34	24.78	19.7	0.274757	4.86e-22
Cps1	2.61	0.85	0.55	0.25	0.5	0.98	-1.22483	5.35e-22
Fyb	1.33	2.61	2.25	2.1	5.63	2.37	0.771566	5.47e-22
Arhgap25	0.73	0.76	0.65	1.29	3.25	0.87	1.35868	5.52e-22
Gm29975	0.06	0.26	0.52	0.05	0.06	0.18	-1.5298	6.1e-22
Map3k13	4.22	3.6	3.6	4.94	6.32	4.38	0.428718	6.13e-22
Trim31	30.99	24.47	18.24	24.99	36.86	31.8	0.340288	6.27e-22
Sectm1a	14.57	8.95	18.51	18.14	22.53	18.68	0.511096	6.32e-22
Slc12a8	22.5	28.42	7.57	13.29	16.29	13.35	-0.417938	6.47e-22
Mmp13	12.92	46.22	34.51	32	4.88	38.38	-0.309036	6.94e-22
Plekhs1	2.33	3.23	6.69	3.92	7.77	8.71	0.769782	7.54e-22
Btbd11	1.86	2.29	1.55	3.64	3.51	2.52	0.790158	7.58e-22
Lipg	8.92	4.19	1.47	2.07	4.1	2.82	-0.704609	7.73e-22
Anln	6.34	11	11.61	6.09	5.88	7.57	-0.479537	8.23e-22
Lmnb1	54.89	46.73	55.16	54.56	32.13	47	-0.22662	8.69e-22
Ndufb5	124.57	148.95	134.42	97.69	98.23	133.74	-0.286638	8.75e-22
Ern1	9	4.3	1.74	7.53	10.77	3.68	0.542576	9.07e-22
Snx1	62.42	58.78	59.93	69.21	74.4	69	0.22936	9.15e-22
Snrpb2	19.93	43.37	63.91	23.87	24.86	47.88	-0.399415	9.22e-22
Ifrd2	39.72	43.52	38.7	38.21	26.5	33.2	-0.314705	9.72e-22
Btg2	38.51	41.38	37.25	47.25	46.89	43.64	0.233194	9.84e-22
Spats2l	11.76	9.33	8.43	9.17	18.21	15.66	0.446126	1.01e-21
S100a13	44.52	43.03	39.62	22.81	35.44	31.16	-0.52883	1.14e-21
Ptpru	4.09	2.03	1.8	4.28	4.42	3.72	0.629303	1.19e-21
G3bp2	36.02	47.65	36.85	41.66	45.75	51.08	0.19676	1.28e-21
Chst15	7.67	7.46	6.01	10.72	10.38	7.22	0.427249	1.37e-21
Eif3e	64.71	113.09	123.89	69.11	76.91	112.96	-0.223029	1.38e-21
Narf	12.51	9.66	7.01	13.1	15.17	9.73	0.378097	1.38e-21
Fgfr1op	7.17	8.96	11.46	5.71	5.54	7.65	-0.544959	1.57e-21
Slc25a23	11.07	6.16	11.16	12.33	14.41	11.73	0.434858	1.6e-21
Islr	4.37	2.4	1.97	3.53	10.5	2.59	0.90207	1.81e-21
Mgst2	93.4	166.23	125.77	76.33	87.44	144.41	-0.317042	1.87e-21
Ccnl1	19.59	34.4	57.22	21.22	28.53	38.99	-0.303842	1.87e-21
Arhgap11a	6.56	12.1	10.51	7.5	6.05	8.47	-0.405471	1.88e-21
Spag5	9.6	12.68	15.84	9.72	7.12	9.34	-0.468918	1.89e-21
Degs2	113.27	109.45	71.39	119.6	111.7	111.83	0.217341	1.9e-21
Cacna1h	2.66	1.2	0.56	1.74	4.45	0.9	0.67259	2.03e-21
Uchl5	13.59	24.95	33.76	14.15	12.32	27.7	-0.455781	2.15e-21
Rangap1	84.75	84.77	91.29	89.62	67.02	75.04	-0.169724	2.25e-21
Ccl8	13.22	5.68	3.95	6.54	33.81	10.14	1.12786	2.26e-21
Arel1	12.2	11.11	9.73	13.17	16.24	12.07	0.33123	2.34e-21
Uba5	14.26	24.25	32.67	13.94	17.4	26.07	-0.387061	2.59e-21
Ifi27	28.25	32.15	26.46	34.46	51.17	33.28	0.45849	2.68e-21
Pink1	54.3	44.02	37.4	54.53	60.8	45.68	0.244511	2.72e-21
Acot11	13.75	15.03	9.95	16.57	15.19	15.55	0.291836	2.73e-21
Foxp3	0.29	0.27	0.6	1.11	2	0.5	1.65098	2.81e-21
Mtmr3	17.64	14.07	13.41	18.38	21.76	14.23	0.279442	3.1e-21
Sgol1	2.87	4.94	5.7	2.46	2.18	3.47	-0.740894	3.48e-21
Ndufv3	139.34	98.31	107.44	89.41	83.99	84.85	-0.334981	3.68e-21
Ciita	1.71	1.02	0.53	1.13	4.24	0.66	0.878033	3.72e-21
Cnot1	28.24	24.6	15.23	26.48	28.69	23.02	0.189683	3.9e-21
Adcy1	2.24	1.55	2.35	2.81	3.62	2.16	0.479415	4.18e-21
Llph	28.33	65.25	87.51	41.15	32.47	70.22	-0.332239	4.2e-21
Atf3	21.79	15.47	38.79	20.92	21.74	15.03	-0.397997	4.26e-21
Tifab	1.46	0.97	1.33	2.19	4.2	1.8	1.08512	4.28e-21
Gm11545	18.58	20.88	14.41	23.6	20.49	24.49	0.35444	4.7e-21
Nudcd2	22.06	32.99	34.37	19.14	17.82	30.32	-0.410081	4.81e-21
Slc35f5	36.48	34.7	27.76	35.93	43.35	40.27	0.269411	4.91e-21
Abcg1	4.64	3.23	3.65	4.58	4.92	6.89	0.505816	5e-21
LOC108169061	49.38	25.31	24.89	44.94	14.27	75.57	0.437875	5.09e-21
Sort1	64.25	48.09	27.84	54.85	58.52	41.63	0.141823	5.26e-21
Chd4	58.13	49.29	58.61	67.26	58.76	56.32	0.134346	5.32e-21
Slc9a2	16.44	17.51	4.81	6.81	17.7	4.72	-0.417997	5.5e-21
Ndufa1	91.44	148.25	193.43	81.39	99.23	164.59	-0.330903	5.62e-21
Mlph	33.92	23.78	18.93	29.55	34.9	26.02	0.235186	6.39e-21
Lig1	25.98	28.2	29.9	25.08	15.75	27.72	-0.293904	6.63e-21
Ttyh1	3.46	7.74	4.83	3.31	2.86	3.41	-0.73946	6.68e-21
Vat1	36.55	36.81	26.34	46.22	42.21	31.09	0.261743	6.99e-21
Ndufc1	130.06	158.4	189.9	131.16	97.2	145.27	-0.355443	7.04e-21
Nfkb1	34.65	24.47	32.12	36.29	38.48	32.49	0.230526	7.29e-21
Kif4	5.48	11.74	12.46	6.05	5.09	8.99	-0.469377	7.76e-21
Rbms1	10.59	21.52	37.51	14.8	18.33	25.05	-0.283429	7.83e-21
Smim15	19.34	42.29	48.08	20.01	25.4	41.79	-0.333591	7.91e-21
R3hdml	41.94	46.1	86.29	55.06	39.79	38.78	-0.340068	8.17e-21
Wdr72	0.12	0.11	0.1	0.34	0.7	0.62	2.28832	8.33e-21
Slc38a4	1.3	3.46	5.23	3.17	1.33	1.38	-0.83675	8.33e-21
Gpd1	21.86	21.78	17.97	31.11	20.41	25.49	0.324128	8.43e-21
Nbr1	26.77	33.88	30.22	29.1	41.16	34.78	0.212089	8.46e-21
Dlgap5	5.62	8.84	10.48	5.66	4.59	6.18	-0.589559	8.47e-21
Lif	2.65	3.15	6.11	7.71	3.59	6.33	0.583761	8.5e-21
Cpne3	14.12	14.07	12.11	15.88	16.68	16.2	0.291142	8.97e-21
Src	56.84	44.8	44.04	62.21	56.96	46.12	0.183401	8.98e-21
Dusp16	8.24	11.4	10.3	11.52	12.49	13.39	0.354218	9.69e-21
Sgol2a	1.2	3.48	5	1.41	1.2	2.8	-0.77458	9.88e-21
Flnb	97.36	68.59	61.06	97.26	81.48	63.72	0.097118	9.97e-21
Polr1d	134.34	181.63	164.17	141.43	126.16	147.93	-0.209389	1.01e-20
Tbcel	9.25	8.3	13.58	14.79	12.28	12.05	0.3435	1.01e-20
Lrp5	43.41	30.21	28.84	51.9	35.61	28.99	0.188545	1.07e-20
Rapgefl1	23.95	19.99	13.26	12.63	15.14	16.88	-0.336928	1.07e-20
Arhgap35	18.97	14.91	13.01	17.45	21.68	15.71	0.219571	1.16e-20
Mnt	12.34	10.81	10.24	16.26	14.08	11.9	0.339695	1.16e-20
Slc16a10	10.98	4.57	6.8	10.06	14.98	6.51	0.405109	1.2e-20
Fgf3	1.85	2.06	4.08	8.89	3.67	2.8	0.878387	1.21e-20
Ndufs4	32.96	52.13	57.32	33.06	33.65	47.26	-0.323209	1.23e-20
Notch1	14.76	8.21	9.93	14.26	14.78	9.9	0.242397	1.27e-20
Hnrnpd	16.07	19.5	23.67	18.87	11.44	20.95	-0.217532	1.47e-20
Eif3k	183	210.86	236.65	200.68	161.16	185.85	-0.201499	1.48e-20
Fcgr4	2.68	2.25	2.26	3.82	9.93	3.11	1.21917	1.58e-20
Hck	3.88	2.76	2.4	5.17	8.59	2.96	0.882196	1.64e-20
Slc11a1	2.59	2.34	3.43	4.82	7.21	3.3	0.870563	1.74e-20
Aacs	53.74	33.34	24.25	35.74	27.29	30.69	-0.247893	1.91e-20
Bag3	56.16	40.46	38.94	42.56	37.45	34.11	-0.24813	2.02e-20
Ceacam1	481.44	558.83	503.56	547.14	475.25	552.14	0.060536	2.04e-20
Glyr1	46.45	47.44	31.8	52.03	50.07	43.25	0.209232	2.07e-20
Cmtr1	14.04	10.14	9.74	13.71	16.21	11.54	0.287217	2.15e-20
Lpl	1.06	1.75	2.12	1.56	4.61	2.84	0.858614	2.21e-20
Lat2	2.82	2.23	2.96	3.43	10.1	3.19	1.06981	2.35e-20
Osbpl2	36.41	26.56	21.83	28.11	40.93	34.13	0.27836	2.4e-20
Tmem63a	50.29	39.39	22.63	31.36	35.19	28.46	-0.243126	2.52e-20
Bckdha	30.17	26.73	25.89	38.08	39.96	27.26	0.347834	2.52e-20
Adcy8	13.98	13.35	18.25	23.43	13.2	18.21	0.299875	2.56e-20
Atp1b3	39.95	52.96	62.16	41.07	36.9	51.19	-0.274589	2.63e-20
Zranb2	13.19	26.42	32.04	13.17	16.24	27.32	-0.336523	2.7e-20
Slco2b1	3.08	1.31	0.48	1.95	5.8	1.12	0.874626	2.71e-20
Oxct1	45.08	58.52	51.15	35.92	46.53	52.86	-0.197744	2.77e-20
1810022K09Rik	42.76	80.62	132.74	42.84	44.47	102.83	-0.433719	2.78e-20
Anxa6	45.63	31.75	48.74	55.59	58.85	33.87	0.233625	2.86e-20
Slc23a2	17.18	17.05	13.84	21.26	18.63	16.86	0.241068	3.16e-20
Dmp1	0.73	0.66	1.55	0.37	0.12	0.08	-2.34263	3.23e-20
Insl5	31.34	29.18	7.67	7.83	17.31	15.99	-0.740729	3.33e-20
Ecscr	36.01	43.19	63.96	71.54	44.24	61.62	0.323288	3.41e-20
Kdm6b	18.68	13.75	16.13	21.17	21.17	14.55	0.234983	3.55e-20
Adamts4	1.82	1.34	0.75	3.44	3.07	1.22	0.984862	3.75e-20
Fam105a	2.77	1.94	2.21	3.26	7.19	2.01	0.843444	3.9e-20
Ruvbl2	54.48	50.55	62.98	51.12	38.07	48.94	-0.278792	4.21e-20
Lama2	0.58	0.54	0.33	0.51	1.74	0.64	1.01354	4.41e-20
Tomm5	99.94	122.69	116.32	96.41	68.84	105.72	-0.321014	4.51e-20
Ccpg1	10.82	14.56	10.96	12.03	18.72	16.87	0.393891	4.54e-20
Plscr1	90.16	100.89	62.57	108.99	85.32	98.62	0.208643	4.99e-20
Gstm2	39.31	33.93	15.8	17.53	22.41	23.87	-0.485799	5.14e-20
Soga1	2.69	1.38	1.58	3.21	3.13	1.5	0.475686	5.22e-20
Nploc4	27.33	21.12	15.79	29.58	27.62	19.86	0.261039	5.27e-20
Pdk4	1.02	0.27	0.54	1.41	2.29	1.09	1.37917	5.34e-20
Spdef	34.07	39.11	16.15	20.91	27	18.82	-0.380202	5.48e-20
Tmem123	24.01	24.53	26.71	28.1	37.45	25.66	0.290276	5.89e-20
Kat6a	8.43	8.5	6.74	9.18	10.8	8.86	0.305285	6.39e-20
Cst3	234.19	184.03	216.52	248.41	284.24	192.63	0.190826	6.39e-20
Tnfsf10	7.21	5.56	11.65	8.97	10.29	12.45	0.374965	6.44e-20
Txn2	143.81	147.06	148.34	138.11	113.89	131.96	-0.193528	6.61e-20
Ceacam2	2.04	1.87	2.04	2.63	4.62	3.64	0.85623	7.07e-20
Exosc2	25.01	28.05	30.23	21.58	14	27.2	-0.406621	7.37e-20
Ptrf	43.1	17.7	26.56	23.17	32.65	16.57	-0.275158	7.41e-20
Cdk11b	32.71	46.64	67.38	34.35	36.23	52.69	-0.253395	7.48e-20
Lyn	16.28	15.15	13.15	17.65	21.61	17.28	0.355548	7.5e-20
Mettl1	18.25	23.65	22.75	17.71	9.98	21.19	-0.458949	7.59e-20
Sh3pxd2a	8.35	5.57	7.69	9.44	11.12	5.73	0.292627	7.78e-20
Rps6ka1	112.26	92.04	86.58	118.5	101.58	99.57	0.143114	7.85e-20
Chka	15.6	13.95	16.22	10.53	13.67	10.02	-0.38788	7.9e-20
Csf2ra	12.67	13.02	16.46	24	28.27	11.7	0.340508	7.9e-20
Kras	18.8	32.27	32.37	20.3	20.79	30.21	-0.229172	7.91e-20
Sec14l1	29.06	15.6	18.23	27.78	28.07	18.69	0.244117	8.07e-20
Cd37	6.62	3.4	2.3	6.46	13.25	3.29	0.926919	8.13e-20
Thoc1	4.44	10.05	16.09	4.97	5.54	12.15	-0.435974	8.13e-20
Klk15	44.91	16.04	80.21	22.33	16.11	68.61	-0.382056	8.5e-20
Ganab	82.11	75.63	71.13	90.68	80.73	81.01	0.142788	8.53e-20
Nudt19	35.67	32.66	27.87	25.09	20.99	29.79	-0.343177	9.04e-20
Lrrc16a	13.37	12.63	12.01	15.01	16.32	15.43	0.299267	9.31e-20
Atp5l	384.38	466.36	410.62	337.06	328.42	449.19	-0.180318	9.9e-20
Icos	0.44	0.63	0.49	0.94	2.72	0.78	1.49578	1.01e-19
Rrm2	26.25	27.72	33.34	23.22	12.6	33.3	-0.33589	1.04e-19
Lsm7	54.22	99.87	121.76	65.35	50.78	90.27	-0.419918	1.04e-19
Dennd5a	9.05	6.15	7.02	9.23	13.2	6.74	0.388645	1.09e-19
Rhbdf2	16.48	12.41	16.01	22.78	18.29	15.2	0.34486	1.11e-19
Aspm	1.53	3.1	3.95	1.56	1.7	2.22	-0.649245	1.16e-19
Pcdhga11	0.17	0.2	0.22	0.53	0.7	0.95	1.87744	1.2e-19
Chtf8	71.24	59.78	46.23	76.65	66.51	57.09	0.186999	1.23e-19
Wdr43	11.94	22.9	24.71	14.36	11.35	21.93	-0.32226	1.26e-19
Lmo7	56.39	63.82	73.06	64.01	76.58	72.42	0.136351	1.28e-19
Bmp7	10.44	12.46	16.46	18.28	18.25	13.34	0.342299	1.31e-19
Acat1	28.57	30.81	22.7	21.56	20.36	26	-0.275097	1.33e-19
Gpr107	20.49	16.43	13.5	21.65	24.07	16.2	0.29447	1.34e-19
Ago1	13.46	13.77	10.93	17.38	14.3	13.6	0.254593	1.36e-19
Sri	91.41	136.42	116.27	95.48	101.74	113.21	-0.155418	1.41e-19
Rps27	1145.98	1395.67	1273.4	1211.36	1045.88	1243.48	-0.124242	1.41e-19
Rcsd1	2.33	2.35	2.49	4.17	7.28	1.57	0.862157	1.41e-19
Lama1	1.15	1.86	1.97	2.58	3.19	1.63	0.571507	1.52e-19
Srp19	24.34	49.82	60.87	25.38	28.32	46.26	-0.436655	1.53e-19
Bub1	2.59	5.23	7.53	2.58	2.57	5.04	-0.591651	1.55e-19
Bdkrb2	3.69	2.79	3.23	6.26	6.05	2.87	0.639132	1.58e-19
Tnfrsf10b	9.18	12.65	14.88	9.11	8.33	9.75	-0.433586	1.61e-19
Irx5	4.38	1.72	7.61	4.73	4.15	13.04	0.674092	1.66e-19
Hyou1	64.75	48.61	51.04	47.24	48.79	50.58	-0.165568	1.68e-19
Cryl1	54.02	41.36	17.83	24.42	28.97	34.51	-0.369836	1.73e-19
Smpx	16.87	17.93	29.22	26.07	25.61	38.24	0.488795	1.79e-19
Hunk	14.35	15.72	14.5	21.75	15.59	16.57	0.276929	1.79e-19
Mbtps1	41.45	35.66	34.7	43.37	48.1	36.58	0.192959	1.8e-19
Ndufv2	71.19	77.45	92.67	57.58	62.08	85.55	-0.236577	1.81e-19
Slc30a10	0.76	0.07	0.05	0.02	0.03	0.03	-3.52522	1.83e-19
Ptprg	5.5	6.63	6.12	7.84	6.57	7.72	0.344766	1.93e-19
Stk39	13.78	14.53	17.2	11.61	9.38	14.88	-0.400866	1.93e-19
Clptm1l	84.35	73.07	63.94	90.13	83.54	77.84	0.183808	1.96e-19
Kif20a	13.68	13.61	14.79	13.38	9.66	9.17	-0.383596	2.02e-19
2021-09-09	65.05	56.49	52.48	74.07	66.04	56.4	0.181244	2.04e-19
Sdf2l1	62.78	50.19	63.6	44.31	47.83	48.43	-0.33083	2.13e-19
Sh3bp5l	21.15	16.31	12.63	22.33	22.47	18.33	0.332809	2.22e-19
Ttk	2.56	6.18	7.48	2.5	2.64	4.77	-0.718383	2.29e-19
Gsto1	349.84	212.86	213.89	224.71	229.46	247.87	-0.147637	2.33e-19
Trpv3	4.49	2.78	1.42	1.1	1.97	2.39	-0.700705	2.42e-19
Prodh	12.9	8.83	9.46	15.76	15.69	11.87	0.475072	2.44e-19
Os9	60.17	62	59.08	68.23	70.8	62.76	0.157246	2.69e-19
Cds2	14.21	9.52	6.83	13.64	15.13	7.47	0.266601	2.69e-19
Mid1	17.29	13.62	12.37	21.7	14.15	18.31	0.337317	2.75e-19
Msi2	13.92	12.68	12.31	14.89	17.05	14.74	0.259534	2.75e-19
Casz1	15.67	12.13	14.61	16.19	19.13	14.8	0.231512	2.82e-19
Pde4b	3.35	4.16	3.23	4.58	7.56	4.48	0.621113	2.89e-19
Ddx3x	48.27	69.51	55.66	57.39	58.71	76.58	0.1493	2.92e-19
Prkg2	5.55	16.25	22.29	8.62	10.94	14.82	-0.334766	3.02e-19
Sod1	362.5	449.92	504.38	394.72	355.63	433.47	-0.153925	3.06e-19
Ssr2	236.11	205.19	223.01	229.03	172.89	188.91	-0.167427	3.18e-19
Mapk13	204.62	189.4	158.53	155.31	142.76	196.74	-0.160429	3.19e-19
Gdpd5	3.31	6.18	3.5	7.99	4.69	6.48	0.569675	3.24e-19
Sepn1	9.61	8.57	12.49	16.46	15.38	8.34	0.391621	3.26e-19
Edf1	275.42	243.12	332.63	250.32	228.37	267.96	-0.189966	3.31e-19
Gak	60.17	44.89	31.61	56.46	53.75	44.14	0.172457	3.41e-19
Adamts10	2.25	1.93	2.78	2.69	7.28	1.91	0.728555	3.58e-19
Fgd2	3.69	2.58	3.97	3.44	8.8	4.8	0.83744	3.65e-19
Tfdp1	50.85	52.39	57.19	47.61	36.38	52.7	-0.222064	3.67e-19
Srm	47.94	48.98	45.98	43.53	28.84	40.85	-0.333994	4.11e-19
Fam234b	1.52	0.8	0.76	1.44	3.63	1.13	1.00246	4.2e-19
2021-09-07	18.8	40.34	56.86	22.02	27.64	47.62	-0.261484	4.22e-19
Aurkaip1	68.25	80.48	91.1	67.26	62.72	67.66	-0.271285	4.31e-19
Pcdh7	2.29	1.74	2.02	3.04	4.36	1.85	0.606945	4.31e-19
Slc12a6	10.23	8.79	7.9	9.14	13.59	10.6	0.316178	4.39e-19
Cfap36	4.66	9.68	17.96	6.05	8.48	13.15	-0.575087	4.61e-19
Gtse1	10.93	13.21	9.27	10.33	7.35	5.9	-0.49179	4.79e-19
Ppp1r1b	407.79	288.29	297.51	312.02	223.65	371.03	-0.107787	4.84e-19
Plvap	30.56	23.07	19.57	39.64	39.41	13.13	0.333517	4.91e-19
Lsm3	39.93	52.9	65.89	39.67	27.14	47.04	-0.477755	5.1e-19
Cars	21.16	21.2	28.33	20.37	16.64	18.6	-0.346722	5.24e-19
Mgl2	1.73	1.29	1.5	3.65	5.42	2.1	1.30548	5.57e-19
9530068E07Rik	70.82	68.45	64.42	89.42	79.6	62.53	0.185614	5.68e-19
Heph	9.85	15.36	7.45	10.65	15.89	14.61	0.327542	5.68e-19
Ap2s1	153.3	161.94	210.39	158.5	133.81	158.34	-0.221457	5.92e-19
Mylip	11.67	8.12	5.97	10.8	14.25	10.3	0.452039	6.16e-19
Rbp1	9.17	8.22	11.12	6.44	7.07	6.05	-0.544655	6.39e-19
Col5a1	9.57	8.9	8.43	10.9	15.92	5.68	0.273884	6.46e-19
Irak2	12.27	13.24	14.79	18.35	19.44	13.63	0.360705	6.56e-19
Amz1	1.21	0.75	1	1.83	4.03	1.12	1.22903	6.63e-19
Dhrs11	45.7	23.13	14.45	16.69	26.98	18.58	-0.426323	7.1e-19
Ccr5	0.89	1.25	1.12	1.77	3.79	1.66	1.13611	7.53e-19
Bod1l	1.46	5.48	6.73	1.87	2.69	5.87	-0.390462	7.58e-19
Il11	7.3	14.33	27.76	13.48	2.3	19.56	-0.484646	7.76e-19
Zfp277	14.84	29.6	27.21	15.49	18.57	22.62	-0.342935	8.01e-19
Rps27l	172.01	211.46	235.59	190	141.89	186.82	-0.255616	8.06e-19
Pmm2	95.23	111.53	80.68	80.65	81.33	86.27	-0.19762	8.3e-19
Gsdmd	103.79	107.29	117.28	105.99	118.41	146.71	0.172514	8.31e-19
Gars	68.48	80.08	75.39	74.36	55.55	66.07	-0.19105	8.61e-19
Rraga	43.24	41.25	40.33	52.66	46.29	53.09	0.284355	8.64e-19
Proser2	7.64	5.27	8.13	11.21	10.35	7.11	0.455922	8.92e-19
Runx3	1.57	1.27	1.65	2.15	4.38	1.79	0.919579	9.15e-19
Stx7	53.85	51.73	64.21	56.43	62.17	78.41	0.212398	9.73e-19
Pgpep1	11.74	11.25	10.39	15.44	14.48	11.61	0.315424	9.74e-19
Phb	98.44	95.37	98.75	93.82	71.15	90.97	-0.191996	9.83e-19
Creb3l2	10.44	11.29	9.36	13.78	14.3	10.21	0.280062	9.89e-19
Saxo1	0.21	0.66	0.57	0.76	1.69	2.98	1.91356	9.9e-19
Mpp6	7.2	19.07	19.27	10.03	8.62	14.38	-0.464151	1.08e-18
Preb	41.96	38.06	26.28	35.5	36.09	26.12	-0.224917	1.11e-18
Gm42052	4.32	15.26	11.11	2.95	7.68	4.71	-1.00965	1.12e-18
Mrpl12	172.19	175.88	142.84	153.66	111.77	160.15	-0.205446	1.13e-18
Cbarp	5.79	4.63	6.37	8.52	8.96	6.33	0.552791	1.16e-18
Jade2	4.01	2.21	1.35	3.59	5.34	2.45	0.564355	1.18e-18
Ubl5	184.1	232.86	296.02	196.87	174.59	232.81	-0.220483	1.18e-18
Arf4	173.23	151.67	177.17	153.55	140.47	162.95	-0.136345	1.2e-18
Zfp362	10.02	9.67	9.63	15.92	13.4	10.12	0.429462	1.2e-18
Dab2	3.72	3.89	4.43	4.67	8.32	4.31	0.548813	1.25e-18
Rtf1	9.77	17.25	23.74	11.52	12.08	18.79	-0.290416	1.31e-18
Anapc13	96.19	136.36	152.63	88.7	87.57	124.13	-0.362772	1.48e-18
Kremen1	12.53	6.97	7.26	12.19	13.11	8.47	0.351996	1.54e-18
Sox21	28.66	17.64	29.98	30.7	29.22	30.09	0.238572	1.59e-18
Acat2	38.9	38.12	34.51	33.82	21.52	35.55	-0.293736	1.6e-18
Cxcl1	11.66	7.19	22.37	23.48	16.8	22.6	0.612269	1.71e-18
Zfp385a	6.31	4.39	3.99	7.8	10.42	4.63	0.648767	1.77e-18
Slc5a9	5.19	9.74	5.41	8.38	7.55	11.26	0.423699	1.77e-18
Srek1ip1	6.08	16.63	22.95	8.66	8.48	14.87	-0.514111	1.78e-18
Arl4c	12.49	13.38	20.84	24.75	15.21	17.17	0.29483	1.83e-18
Reep4	39.33	50.13	63.31	45.08	37.18	43.89	-0.275801	1.91e-18
Naaladl1	6.06	1.1	0.34	0.65	1.61	0.82	-1.29311	1.95e-18
Asf1b	24.1	19.42	21.18	16.32	11.03	19.93	-0.451685	1.97e-18
Tbc1d9b	17.43	13.48	10.22	19.17	17.54	12.96	0.27381	2.01e-18
Sparc	104.15	138.19	137.69	152.92	159.08	104.09	0.130464	2.02e-18
Kdelr2	86.58	79.77	77.04	69.89	66.67	74.63	-0.205924	2.02e-18
Pgap2	52.02	40.12	44.09	52.67	55.26	52.77	0.241325	2.07e-18
Parvg	1.36	1.04	0.89	2.18	3.86	1.32	1.1655	2.39e-18
Ceacam20	34.31	30.26	16.8	25.68	45.85	27.13	0.263836	2.46e-18
Psmc6	25.85	52.28	73.82	29.31	34.04	61.27	-0.289082	2.48e-18
Rnf150	1.46	0.7	1.4	1.93	1.95	1.66	0.637581	2.5e-18
Ppp1r16b	0.67	0.62	0.58	0.98	2.25	0.57	1.01844	2.57e-18
Alox12e	1.32	1.02	0.26	2.27	2.94	1.45	1.35642	2.68e-18
Lss	13.86	7.23	6.84	7.87	5.96	6.99	-0.359832	2.7e-18
Mybl2	10.79	9.66	11.82	10.12	5.22	9.75	-0.401446	2.71e-18
Baz2a	27.06	21.72	24.42	28.23	28.51	24.68	0.179636	2.72e-18
Utp20	5.91	9.17	5.66	6.01	5.1	5.42	-0.327665	2.74e-18
[truncated: 15,638 more rows]
